# Supplementary material for: Addition of arylstannanes to alkynes givingortho-alkenylarylstannanes catalysed cooperatively by a rhodium complex and zinc chloride
Source: Royal Society of Chemistry journal article supplement (doi:10.1039/c8sc02459f), 2018-01-01

## Electronic Supplementary Information (ESI)

---

### Supporting Information

#### Contents:

|                                                                                                                                                    |      |
|----------------------------------------------------------------------------------------------------------------------------------------------------|------|
| 1. General method                                                                                                                                  | S-2  |
| 2. Materials                                                                                                                                       | S-2  |
| 3. Preparation of trioctyl(phenyl)stannane ( <b>1d</b> ) [143363-50-2]                                                                             | S-3  |
| 4. Preparation of tributyl(4-(trifluoromethoxy)phenyl)stannane ( <b>1h</b> ) and tributyl(pentadeutero-phenyl)stannane ( <b>1a-d<sub>5</sub></b> ) | S-3  |
| 5. Preparation of 1-(4-trimethylsilylphenyl)but-1-yne ( <b>2i</b> ) and 1-(3,4,5-trimethoxyphenyl)but-1-yne ( <b>2j</b> )                          | S-4  |
| 6. A typical procedure for migratory arylstannylation of alkynes catalysed by rhodium complex and zinc chloride (Table 1, entry 1)                 | S-5  |
| 7. Reactions to support the catalytic cycle (Scheme 3)                                                                                             | S-6  |
| 8. Transformations of ( <i>E</i> )-4-(2-tributylstannylphenyl)oct-4-ene ( <b>3aa</b> ) (Scheme 4)                                                  | S-9  |
| 9. Characterization of the products                                                                                                                | S-11 |
| 10. Single crystal X-ray diffraction data for compound <b>3ag</b> (CCDC 1841177)                                                                   | S-26 |
| 11. References                                                                                                                                     | S-28 |
| 12. NMR spectra                                                                                                                                    | S-29 |

## 1. General method

All anaerobic and moisture-sensitive manipulations were carried out with standard Schlenk techniques under dry nitrogen gas. NMR spectra were recorded on a Bruker AV 500MHz NMR, BBI probe (500 MHz for  $^1\text{H}$ , 125 MHz for  $^{13}\text{C}$ ), Bruker AV 400MHz NMR, QNP probe (400 MHz for  $^1\text{H}$ , 100 MHz for  $^{13}\text{C}$ , 61 MHz for  $^2\text{H}$ ), Bruker AVIII 400MHz NMR, BBFO Probe (400 MHz for  $^1\text{H}$ , 100 MHz for  $^{13}\text{C}$ ), JEOL ECA 400 MHz NMR (400 MHz for  $^1\text{H}$ , 100 MHz for  $^{13}\text{C}$ ), or Bruker AV 300MHz NMR, QNP probe (300 MHz for  $^1\text{H}$ , 75 MHz for  $^{13}\text{C}$ ). Chemical shifts are reported in  $\delta$  (ppm) referenced to the residual peaks of  $\text{CDCl}_3$  ( $\delta$  7.26) for  $^1\text{H}$  NMR,  $\text{CDCl}_3$  ( $\delta$  77.00) for  $^{13}\text{C}$  NMR and acetone ( $\delta$  2.05) for  $^2\text{H}$  NMR. The following abbreviations are used to describe the multiplicities; s: singlet, d: doublet, t: triplet, q: quartet, quint: quintet, sext: sextet, m: multiplet, br: broad. High resolution mass spectra (HRMS) were obtained with a Waters Q-ToF Premier mass spectrometer. For thin layer chromatography (TLC), Merck pre-coated TLC plates (Merck 60 F254) were used, and compounds were visualized with a UV light at 254 nm. Further visualization was achieved by basic aqueous  $\text{KMnO}_4$  solution stain. Flash column chromatography was performed with Silica gel 60 (Merk). The products were further purified by GPC (Gel Permeation Chromatography) if necessary.

## 2. Materials

Alkynes (**2a–2c**, **2e–2h**, **2k** and **2l**), aryl halides, bisphosphine ligands,  $n\text{-BuLi}$ ,  $\text{D}_2\text{O}$ ,  $\text{CuI}$ ,  $\text{CuCl}$ ,  $\text{AgOTf}$ ,  $\text{KOH}$ ,  $\text{Mg}$ ,  $\text{ZnCl}_2$ ,  $\text{ZnBr}_2$ ,  $\text{ZnI}_2$ , cyclohex-2-enone, trifluoroacetic anhydride, tributyltin chloride,  $\text{PhSnCl}_3$ ,  $\text{PhSnBu}_3$  (**1a**),  $\text{PhSnMe}_3$  (**1b**), 4-MeOC $_6\text{H}_4\text{SnBu}_3$  (**1i**), 4-FC $_6\text{H}_4\text{SnBu}_3$  (**1j**), 4-ClC $_6\text{H}_4\text{SnBu}_3$  (**1k**), 1-chloromethyl-4-fluoro-1,4-diazoniabicyclo[2.2.2]octane bis(tetrafluoroborate), 1-bromooctane, 1-bromopropane, 2-bromo-1,1,2-triphenylethylene,  $[\text{IrCl}(\text{coe})_2]_2$ ,  $\text{CoCl}_2(\text{xantphos})$ ,  $\text{PdCl}_2(\text{PPh}_3)_2$ ,  $\text{RhCl}(\text{PPh}_3)_3$  and iodine were purchased and used as received. Dioxane and THF were distilled over benzophenone ketyl under  $\text{N}_2$ .

$[\text{RhCl}(\text{coe})_2]_2$ ,<sup>1</sup>  $[\text{RhCl}(\text{cod})]_2$ ,<sup>2</sup>  $\text{RhPh}(\text{binap})(\text{PPh}_3)$  (**5**) [434314-09-7],<sup>3</sup> 4-BrC $_6\text{H}_4\text{SnBu}_3$  (**1l**) [17151-49-4],<sup>4</sup> 4-NCC $_6\text{H}_4\text{SnBu}_3$  (**1m**) [79048-30-9],<sup>4</sup> 4-MeOCC $_6\text{H}_4\text{SnBu}_3$  (**1n**) [91734-76-8],<sup>5</sup> and but-2-yn-1-ylcyclohexane (**2d**) [57497-07-1]<sup>6</sup> were prepared according to the reported procedures.

### 3. Preparation of trioctyl(phenyl)stannane (1d) [143363-50-2]

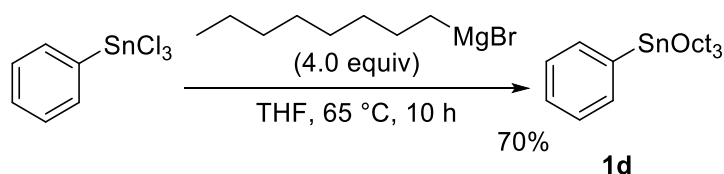

To a solution of octylmagnesium bromide in THF (25.0 mL), prepared from magnesium turnings (593 mg, 24 mmol) and 1-bromooctane (3.86 g, 20.0 mmol), PhSnCl<sub>3</sub> (1.51 g, 5.0 mmol) was added dropwise over 15 min at room temperature. The mixture was stirred at 65 °C for 10 h before H<sub>2</sub>O (10.0 mL) was added. The mixture was extracted with ethyl acetate, and the combined organic layer was dried over MgSO<sub>4</sub> and concentrated under reduced pressure. The residue was subjected to chromatography on silica gel (pre-treated with 1% Et<sub>3</sub>N in hexanes) to give trioctyl(phenyl)stannane (**1d**) [143363-50-2] (70%, 1.87 g, 3.5 mmol) as colorless oil. The spectral data are in agreement with reported literature values.<sup>7</sup>

PhSnPr<sub>3</sub> (**1c**) [55335-05-2] was prepared in the same manner as above using propylmagnesium bromide, and the spectral data are in agreement with reported literature values.<sup>8</sup>

### 4. Preparation of tributyl(4-(trifluoromethoxy)phenyl)stannane (1h) and tributyl(penta-deuterophenyl)stannane (1a-d<sub>5</sub>)

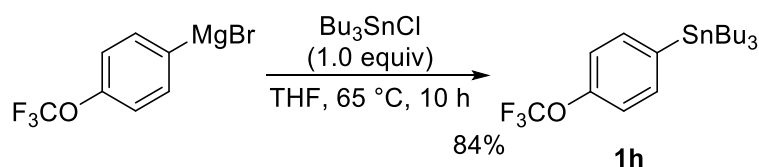

To a solution of 4-(trifluoromethoxy)phenylmagnesium bromide in THF (10.0 mL), prepared from magnesium turnings (288 mg, 12 mmol) and 4-bromotrifluoromethoxybenzene (2.41 g, 10.0 mmol), Bu<sub>3</sub>SnCl (3.26 g, 10.0 mmol) was added dropwise over 15 min at room temperature. The mixture was stirred at 65 °C for 10 h before H<sub>2</sub>O (5.0 mL) was added. The mixture was extracted with ethyl acetate, and the combined organic layer was dried over MgSO<sub>4</sub> and concentrated under reduced pressure. The residue was subjected to chromatography on silica gel (pre-treated with 1% Et<sub>3</sub>N in hexanes) to give tributyl(4-(trifluoromethoxy)phenyl)stannane (**1h**) (84%, 3.79 g, 8.4 mmol) as colorless oil. *R<sub>f</sub>* = 0.7 (hexanes). <sup>1</sup>H NMR (400 MHz, CDCl<sub>3</sub>) δ 0.92 (t, *J*<sub>H,H</sub> = 7.3 Hz, 9H), 1.09 (t, *J*<sub>H,H</sub> = 8.1 Hz, *J*<sub>H,<sup>119</sup>Sn</sub> = 51.2 Hz, 6H), 1.36 (sext, *J*<sub>H,H</sub> = 7.3 Hz, 6H), 1.45–1.65 (m, 6H), 7.19 (d, *J*<sub>H,H</sub> = 7.6 Hz, 2H), 7.50 (d, *J*<sub>H,H</sub> = 8.1 Hz, *J*<sub>H,<sup>119</sup>Sn</sub> = 35.7 Hz, 2H); <sup>13</sup>C NMR (100 MHz, CDCl<sub>3</sub>) δ 9.7 (*J*<sub>C,<sup>119</sup>Sn</sub> = 343.4 Hz, *J*<sub>C,<sup>117</sup>Sn</sub> = 328.2 Hz), 13.6, 27.4 (*J*<sub>C,<sup>119</sup>Sn</sub> = 55.9 Hz), 29.0 (*J*<sub>C,<sup>119</sup>Sn</sub> = 20.3 Hz), 120.3 (*J*<sub>C,<sup>119</sup>Sn</sub> = 41.7 Hz), 120.6 (q, *J*<sub>C,<sup>19</sup>F</sub> = 256.8

## Electronic Supplementary Information (ESI)

Hz), 137.6 ( $J_{\text{C},^{119}\text{Sn}} = 33.5$  Hz), 140.6 ( $J_{\text{C},^{119}\text{Sn}} = 368.7$  Hz,  $J_{\text{C},^{117}\text{Sn}} = 352.7$  Hz), 149.5 (q,  $J_{\text{C},^{19}\text{F}} = 1.4$  Hz). **HRMS** (ESI) calcd for  $\text{C}_{19}\text{H}_{31}\text{OF}_3\text{Na}^{120}\text{Sn} [\text{M}+\text{Na}]^+ 475.1247$ , found 475.1272.

$\text{C}_6\text{D}_5\text{SnBu}_3$  (**1a-d<sub>5</sub>**) was prepared in the same manner as above using pentadeutero-phenylmagnesium bromide and  $\text{Bu}_3\text{SnCl}$ . Thus, the reaction of a solution of pentadeutero-phenylmagnesium bromides in THF (10.0 mL), prepared from magnesium turnings (299 mg, 12 mmol) and pentadeutero-phenyl bromide (1.62g, 10.0 mmol), with  $\text{Bu}_3\text{SnCl}$  (3.26 g, 10.0 mmol) at 65 °C for 10 h gave tributyl(pentadeutero-phenyl)stannane (**1a-d<sub>5</sub>**) (83% yield, 3.09 g, 8.3 mmol) as colorless oil.  $R_f = 0.9$  (hexanes). **<sup>1</sup>H NMR** (300 MHz,  $\text{CDCl}_3$ )  $\delta$  0.93 (t,  $J_{\text{H,H}} = 7.3$  Hz, 9H), 1.10 (t,  $J_{\text{H,H}} = 8.1$  Hz,  $J_{\text{H},^{119}\text{Sn}} = 51.1$  Hz, 6H), 1.37 (sext,  $J_{\text{H,H}} = 7.3$  Hz, 6H), 1.44–1.75 (m, 6H); **<sup>13</sup>C NMR** (75 MHz,  $\text{CDCl}_3$ )  $\delta$  9.5 ( $J_{\text{C},^{119}\text{Sn}} = 339.6$  Hz,  $J_{\text{C},^{117}\text{Sn}} = 324.6$  Hz), 13.7, 27.4 ( $J_{\text{C},^{119}\text{Sn}} = 56.6$  Hz), 29.1 ( $J_{\text{C},^{119}\text{Sn}} = 20.1$  Hz), 127.4 (t,  $J_{\text{C},^2\text{H}} = 24.1$  Hz), 136.0 (t,  $J_{\text{C},^2\text{H}} = 24.0$  Hz), 141.7. **HRMS** (ESI) calcd for  $\text{C}_{18}\text{H}_{27}\text{D}_5\text{Na}^{120}\text{Sn} [\text{M}+\text{Na}]^+ 396.1738$ , found 396.1733.

4-MeC<sub>6</sub>H<sub>4</sub>SnBu<sub>3</sub> (**1e**) [31614-66-1],<sup>7</sup> 4-PhC<sub>6</sub>H<sub>4</sub>SnBu<sub>3</sub> (**1f**) [51533-89-2],<sup>4</sup> 4-Me<sub>3</sub>SiC<sub>6</sub>H<sub>4</sub>SnBu<sub>3</sub> (**1g**) [38860-01-4],<sup>9</sup> 4-CF<sub>3</sub>C<sub>6</sub>H<sub>4</sub>SnBu<sub>3</sub> (**1o**) [86487-19-6],<sup>5</sup> 3-MeC<sub>6</sub>H<sub>4</sub>SnBu<sub>3</sub> (**1p**) [68971-88-0],<sup>5</sup> 3-Me<sub>3</sub>SiC<sub>6</sub>H<sub>4</sub>SnBu<sub>3</sub> (**1q**) [1026787-60-9],<sup>10</sup> 3-CF<sub>3</sub>C<sub>6</sub>H<sub>4</sub>SnBu<sub>3</sub> (**1r**) [53566-38-4],<sup>11</sup> 2-naphthylSnBu<sub>3</sub> (**1s**) [972-11-2],<sup>11</sup> and 2-MeC<sub>6</sub>H<sub>4</sub>SnBu<sub>3</sub> (**1t**) [68971-87-9]<sup>5</sup> were prepared in the same manner as above from the corresponding arylmagnesium bromides and  $\text{Bu}_3\text{SnCl}$ . Their spectral data are in agreement with reported literature values.

### 5. Preparation of 1-(4-trimethylsilylphenyl)but-1-yne (**2i**) and 1-(3,4,5-trimethoxyphenyl)but-1-yne (**2j**)

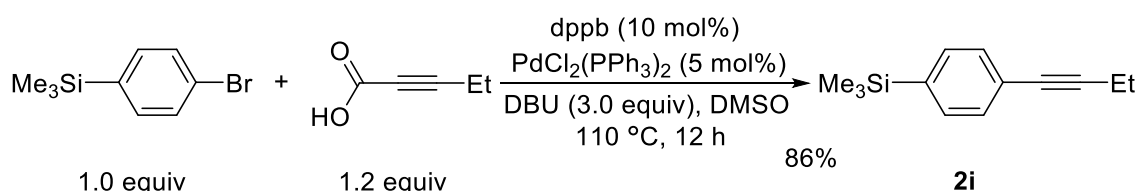

$\text{PdCl}_2(\text{PPh}_3)_2$  (351.0 mg, 0.50 mmol, 5.0 mol%) and 1,4-bis(diphenylphosphino)butane (426.5 mg, 1.0 mmol, 10.0 mol%) were placed in a 100 mL flask under nitrogen. DMSO (25 mL) was added and the mixture was stirred at room temperature for 10 min. To the mixture, 1-bromo-4-(trimethylsilyl)benzene (2.29 g, 10.0 mmol), 2-pentynoic acid (1.18 g, 12.0 mmol) and DBU (4.58 g, 30.0 mmol) were added. The mixture was heated at 110 °C for 12 h. The mixture was diluted with 20.0 mL of diethyl ether, and it was passed through a short pad of silica gel with ethyl acetate as an eluent. The solution was washed with  $\text{H}_2\text{O}$  and brine, dried over anhydrous  $\text{MgSO}_4$ , and concentrated under reduced pressure. The residue was subjected to chromatography on silica gel to give 1-(4-trimethylsilylphenyl)but-1-yne (**2i**) (86%, 1.74 g, 8.6 mmol) as pale yellow oil.  $R_f = 0.7$  (hexanes). **<sup>1</sup>H NMR** (400 MHz,  $\text{CDCl}_3$ )  $\delta$  0.25 (s, 9H), 1.24 (t,  $J_{\text{H,H}} = 7.5$  Hz, 3H), 2.42 (q,  $J_{\text{H,H}} = 7.5$  Hz, 2H), 7.36 (d,



## Electronic Supplementary Information (ESI)

$J_{\text{H,H}} = 8.1$  Hz, 2H), 7.43 (d,  $J_{\text{H,H}} = 8.1$  Hz, 2H);  $^{13}\text{C}$  NMR (100 MHz,  $\text{CDCl}_3$ )  $\delta$  -1.2, 13.1, 13.9, 80.0, 92.1, 124.3, 130.6, 133.1, 139.9. **HRMS** (ESI) calcd for  $\text{C}_{13}\text{H}_{19}\text{Si}$   $[\text{M}+\text{H}]^+$  203.1256, found 203.1218.

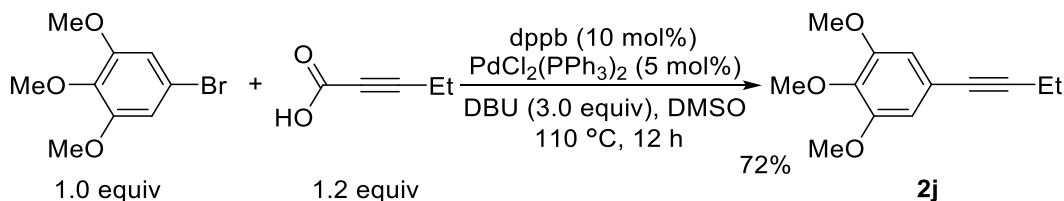

The alkyne, 1-(3,4,5-trimethoxyphenyl)but-1-yne (**2j**), was prepared in the same manner as above using 5-bromo-1,2,3-trimethoxybenzene. Thus, the reaction of  $\text{PdCl}_2(\text{PPh}_3)_2$  (351.0 mg, 0.50 mmol, 5.0 mol%), 1,4-bis(diphenylphosphino)butane (426.5 mg, 1.0 mmol, 10.0 mol%), 5-bromo-1,2,3-trimethoxybenzene (2.47 g, 10.0 mmol), 2-pentynoic acid (1.18 g, 12.0 mmol) and DBU (4.58 g, 30.0 mmol) at 110 °C for 12 h gave **2j** (72% yield, 1.59 g, 7.2 mmol) as colorless solid.  $R_f = 0.1$  (hexanes).  $^1\text{H}$  NMR (400 MHz,  $\text{CDCl}_3$ )  $\delta$  1.24 (t,  $J_{\text{H,H}} = 7.5$  Hz, 3H), 2.41 (q,  $J_{\text{H,H}} = 7.5$  Hz, 2H), 3.83 (s, 3H), 3.84 (s, 6H), 6.63 (s, 2H);  $^{13}\text{C}$  NMR (100 MHz,  $\text{CDCl}_3$ )  $\delta$  12.9, 13.8, 55.9, 60.8, 79.7, 90.6, 108.6, 119.0, 138.1, 152.8. **HRMS** (ESI) calcd for  $\text{C}_{13}\text{H}_{17}\text{O}_3$   $[\text{M}+\text{H}]^+$  221.1178, found 221.1190.

### 6. A typical procedure for migratory arylstannylation of alkynes catalysed by rhodium complex and zinc chloride (Table 1, entry 1)

$[\text{RhCl}(\text{coe})_2]_2$  (3.58 mg, 0.0050 mmol, 5.0 mol% of Rh), binap (6.85 mg, 0.0110 mmol, 5.5 mol%),  $\text{ZnCl}_2$  (27.3 mg, 0.20 mmol) and  $\text{PhSnBu}_3$  (**1a**) (146.9 mg, 0.40 mmol) were placed in a 10 mL Schlenk tube under nitrogen. Dioxane (1.0 mL) was added and the mixture was stirred at room temperature for 10 min. Before the tube was sealed, 4-octyne (**2a**) (22.0 mg, 0.20 mmol) was added. The tube was placed in a preheated oil bath at 130 °C and the mixture was stirred for 16 h. The reaction mixture was passed through a short pad of basic aluminum oxide with ethyl acetate as the eluent. The solvent was removed on a rotary evaporator. The residue was subjected to chromatography on silica gel (pre-treated with 1%  $\text{Et}_3\text{N}$  in hexanes) to give (*E*)-4-(2-tributylstannylphenyl)oct-4-ene (**3aa**) (85%, 81.2 mg, 0.17 mmol) as colorless oil.

The procedures shown above in Section 6 for the reaction of  $\text{PhSnBu}_3$  (**1a**) with 4-octyne (**2a**) (Table 1, entry 1) were used for the reaction of  $\text{ArSnR}_3$  (**1c–1h**, **1j–1n** and **1p–1t**) with 4-octyne (**2a**) (Table 2, entries 3–8, 10, 11, 13, 15, 17 and 20–24), and that of  $\text{PhSnBu}_3$  (**1a**) with unfunctionalised alkynes (**2b–2l**) (Table 3).

In the reaction of  $\text{ArSnR}_3$  (**1k–1o**) with 4-octyne (**2a**) (Table 2, entries 12, 14, 16, 18 and 19), the procedures shown in Section 6 were modified by use of segphos instead of binap.

In Table 2 entry 2, the procedures shown in Section 6 were modified by using THF as solvent and decreasing the reaction temperature to 90 °C. Thus, the reaction of  $[\text{RhCl}(\text{coe})_2]_2$  (3.58 mg, 0.0050 mmol,

## Electronic Supplementary Information (ESI)

5.0 mol% of Rh), binap (6.85 mg, 0.0110 mmol, 5.5 mol%),  $\text{ZnCl}_2$  (27.3 mg, 0.20 mmol),  $\text{PhSnMe}_3$  (**1b**) (96.4 mg, 0.40 mmol) and 4-octyne (**2a**, 22.0 mg, 0.20 mmol) in THF (1.0 mL) at 90 °C for 16 h gave (*E*)-4-(2-trimethylstannylphenyl)oct-4-ene (**3ba**) (77% yield, 54.1 mg, 0.15 mmol) as colorless oil. The same procedures for the reaction of  $\text{PhSnMe}_3$  (**1b**) with 4-octyne (**2a**) were also applied to the reaction of 4-MeOC<sub>6</sub>H<sub>4</sub>SnBu<sub>3</sub> (**1i**) with 4-octyne (**2a**) (Table 2, entry 9).

### 7 Reactions to support the catalytic cycle (Scheme 3)

Scheme 3a

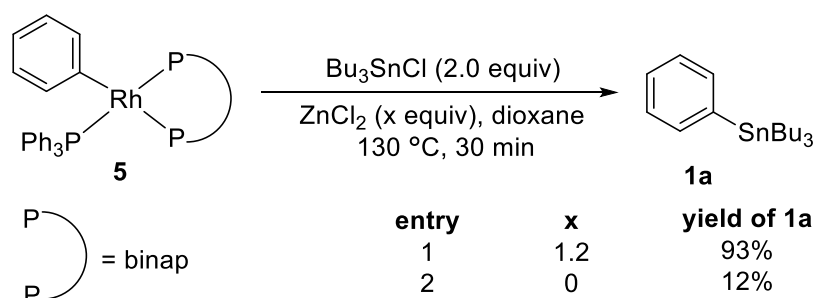

**Scheme 3a, entry 1:** In an oven-dried Schlenk tube,  $\text{RhPh(PPh}_3\text{)(binap)}$  (**5**) (106.0 mg, 0.10 mmol) and  $\text{ZnCl}_2$  (16.4 mg, 0.12 mmol) were placed under nitrogen. Dioxane (1.0 mL) and  $\text{Bu}_3\text{SnCl}$  (65.3 mg, 0.20 mmol) were added and the mixture was heated at 130 °C for 30 min. The reaction was quenched with saturated aqueous solution of  $\text{Na}_2\text{CO}_3$  (1.0 mL). The mixture was extracted with diethyl ether, and the combined organic layer was dried over  $\text{MgSO}_4$  and concentrated under reduced pressure. The residue was subjected to short chromatography on silica gel (pre-treated with 1%  $\text{Et}_3\text{N}$  in hexanes) to give tributyl(phenyl)stannane (**1a**) (93%, 34.5 mg, 0.09 mmol) as colorless oil.  $R_f$  = 0.9 (hexanes). The spectral data are in agreement with reported literature values.<sup>10b</sup>

**Scheme 3a, entry 2:** The procedures for entry 1 in Scheme 3a were modified by removing  $\text{ZnCl}_2$ . The reaction of  $\text{RhPh(PPh}_3\text{)(binap)}$  (107.1 mg, 0.10 mmol) and  $\text{Bu}_3\text{SnCl}$  (66.0 mg, 0.20 mmol) in dioxane (1.0 mL) at 130 °C for 30 min gave tributyl(phenyl)stannane (**1a**) (12%, 4.5 mg, 0.01 mmol) as colorless oil.

Scheme 3b

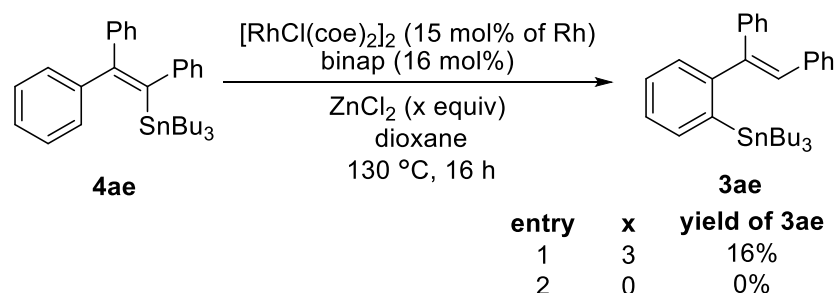

**Preparation of compound 4ae:** To a solution of 2-bromo-1,1,2-triphenylethylene (3.35 g, 10.0 mmol) in diethyl ether (20.0 mL), *n*-BuLi (5.0 mL, 10.0 mmol, 2.0 M in cyclohexane) was added dropwise at  $-78^{\circ}\text{C}$  over 30 min. The mixture was allowed to warm to  $0^{\circ}\text{C}$  and stirred for 2 h.  $\text{Bu}_3\text{SnCl}$  (3.30 g, 10.1 mmol) was added to the mixture at  $0^{\circ}\text{C}$ . The mixture was stirred at room temperature for 12 h before  $\text{H}_2\text{O}$  (5.0 mL) was added. The mixture was extracted with ethyl acetate, and the combined organic layer was dried over  $\text{MgSO}_4$  and concentrated under reduced pressure. The residue was subjected to chromatography on silica gel (pre-treated with 1%  $\text{Et}_3\text{N}$  in hexanes) to give **4ae** (88%, 4.78 g, 8.8 mmol) as pale yellow oil.  $R_f = 0.8$  (hexanes).  $^1\text{H NMR}$  (400 MHz,  $\text{CDCl}_3$ )  $\delta$  0.53 (t,  $J_{\text{H,H}} = 8.2$  Hz,  $J_{\text{H},^{119}\text{Sn}} = 50.8$  Hz, 6H), 0.80 (t,  $J_{\text{H,H}} = 7.2$  Hz, 9H), 1.16 (sext,  $J_{\text{H,H}} = 7.2$  Hz, 6H), 1.21–1.32 (m, 6H), 6.87–7.03 (m, 8H), 7.12 (t,  $J_{\text{H,H}} = 7.6$  Hz, 2H), 7.28–7.35 (m, 5H);  $^{13}\text{C NMR}$  (100 MHz,  $\text{CDCl}_3$ )  $\delta$  11.6 ( $J_{\text{C},^{119}\text{Sn}} = 334.2$  Hz,  $J_{\text{C},^{117}\text{Sn}} = 319.6$  Hz), 13.6, 27.3 ( $J_{\text{C},^{119}\text{Sn}} = 61.6$  Hz), 29.0 ( $J_{\text{C},^{119}\text{Sn}} = 19.3$  Hz), 124.4, 125.9, 127.1, 127.2, 127.6, 128.0 ( $J_{\text{C},^{119}\text{Sn}} = 15.6$  Hz), 128.1, 129.4, 130.0, 142.5 ( $J_{\text{C},^{119}\text{Sn}} = 49.2$  Hz), 145.9 ( $J_{\text{C},^{119}\text{Sn}} = 26.0$  Hz), 146.2 ( $J_{\text{C},^{119}\text{Sn}} = 25.4$  Hz), 148.3, 152.7 ( $J_{\text{C},^{119}\text{Sn}} = 24.7$  Hz). **HRMS** (ESI) calcd for  $\text{C}_{32}\text{H}_{42}\text{Na}^{120}\text{Sn} [\text{M}+\text{Na}]^+$  569.2206, found 569.2206.

**Scheme 3b, entry 1:** In an oven-dried Schlenk tube,  $[\text{RhCl}(\text{coe})_2]_2$  (10.9 mg, 0.015 mmol, 15 mol% of Rh), binap (19.9 mg, 0.032 mmol, 16 mol%),  $\text{ZnCl}_2$  (81.5 mg, 0.60 mmol) and compound **4ae** (110.2 mg, 0.20 mmol) were placed under nitrogen. Before the tube was sealed, dioxane (1.0 mL) was added. The reaction mixture was heated at  $130^{\circ}\text{C}$  for 16 h. The reaction mixture was passed through a short pad of basic aluminum oxide with ethyl acetate as the eluent. The solvent was removed on a rotary evaporator. The residue was subjected to chromatography on silica gel (pre-treated with 1%  $\text{Et}_3\text{N}$  in hexanes) to give **3ae** (16%, 17.6 mg, 0.32 mmol) as colorless oil.

**Scheme 3b, entry 2:** The procedures for entry 2 in Scheme 3b were modified by removing  $\text{ZnCl}_2$ . The reaction of compound **4ae** (112.2 mg, 0.21 mmol),  $[\text{RhCl}(\text{coe})_2]_2$  (10.5 mg, 0.015 mmol, 15 mol% of Rh) and binap (19.5 mg, 0.032 mmol, 16 mol%) in dioxane (1.0 mL) at  $130^{\circ}\text{C}$  for 16 h did not give **3ae**. Compound **3ae** was not detected by  $^1\text{H NMR}$  or GC.

Scheme 3c

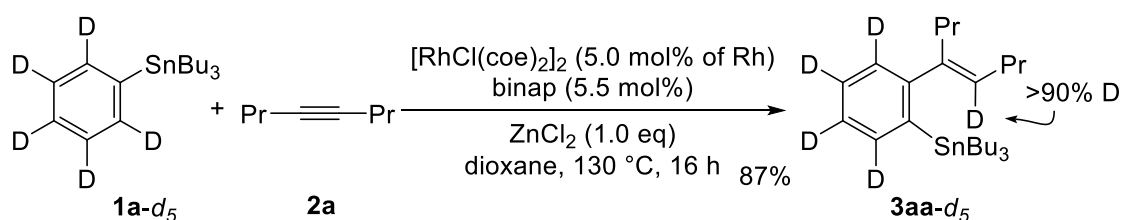

**Scheme 3c:** The procedures shown in Section 6 for the reaction of  $\text{PhSnBu}_3$  (**1a**) with 4-octyne (**2a**) (Table 1, entry 1) were used for the reaction of  $\text{C}_6\text{D}_5\text{SnBu}_3$  (**1a-d<sub>5</sub>**) with 4-octyne (**2a**). Thus, the reaction of  $[\text{RhCl}(\text{coe})_2]_2$  (3.61 mg, 0.0050 mmol, 5.0 mol% of Rh), binap (6.92 mg, 0.0110 mmol, 5.5 mol%),  $\text{ZnCl}_2$  (27.6 mg, 0.20 mmol),  $\text{C}_6\text{D}_5\text{SnBu}_3$  (**1a-d<sub>5</sub>**) (148.9 mg, 0.40 mmol) and 4-octyne (**2a**) (22.3 mg, 0.20 mmol) in dioxane (1.0 mL) at 130 °C for 16 h gave **3aa-d<sub>5</sub>** (87% yield, 83.9 mg, 0.17 mmol) as colorless oil.

Scheme 3d

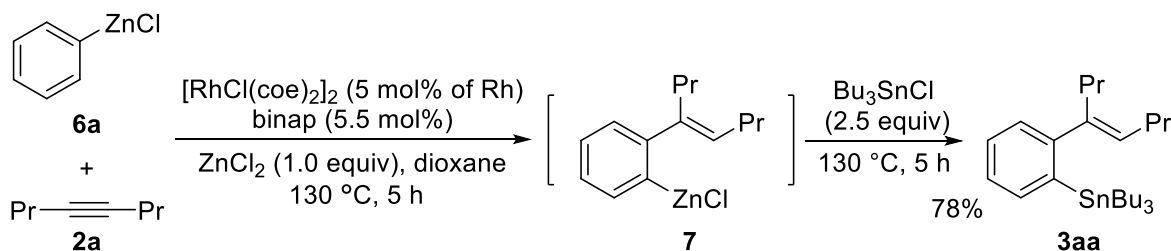

**Preparation of  $\text{PhZnCl}$  (**6a**):** An oven-dried Schlenk flask equipped with a stir bar was charged with a solution of bromobenzene (3.39 g, 22.0 mmol) in THF (12.0 mL). The solution was cooled down to −80 °C and  $n\text{-BuLi}$  (7.4 mL, 20.0 mmol, 2.69 M in hexanes) was added dropwise over 30 min. Precipitates were formed immediately. The reaction mixture was stirred at −80 °C for 90 min. To the THF solution of phenyllithium thus generated, the THF solution of  $\text{ZnCl}_2$  (30.0 mL, 30 mmol, 1.0 M) was added dropwise at −80 °C. The reaction mixture was allowed to warm to room temperature to give a solution of phenylzinc chloride (**6a**) (0.4 M) and  $\text{ZnCl}_2$  (0.2 M) in THF.

**Scheme 3d:** In an oven-dried Schlenk tube,  $[\text{RhCl}(\text{coe})_2]_2$  (3.58 mg, 0.0050 mmol, 5.0 mol% of Rh) and binap (6.85 mg, 0.0110 mmol, 5.5 mol%) were placed under nitrogen. Dioxane (1.2 mL) was added and the mixture was stirred at room temperature for 10 min. To the mixture, 4-octyne (**2a**) (22.3 mg, 0.20 mmol) and 1.0 mL of the THF solution containing phenylzinc chloride (**6a**) (0.40 mmol, 0.4 M) and  $\text{ZnCl}_2$  (0.4 mmol, 0.2 M), whose preparation is shown above, were added at room temperature. After the mixture was concentrated to *ca.* 1.0 mL under the flow of dry  $\text{N}_2$ , the reaction mixture was heated at 130 °C for 5 h.  $\text{Bu}_3\text{SnCl}$  (163.1 mg, 0.50 mmol) was added to the mixture at room temperature and the mixture was heated at 130 °C for another 5 h. The reaction mixture was passed through a short pad of basic aluminum oxide with ethyl acetate as the eluent. The solvent was removed on a rotary evaporator.

## Electronic Supplementary Information (ESI)

The residue was subjected to chromatography on silica gel (pre-treated with 1% Et<sub>3</sub>N in hexanes) to give (*E*)-4-(2-tributylstannylphenyl)oct-4-ene (**3aa**) (78%, 74.6 mg, 0.16 mmol) as colorless oil.

### 8. Transformations of (*E*)-4-(2-tributylstannylphenyl)oct-4-ene (**3aa**) (Scheme 4)

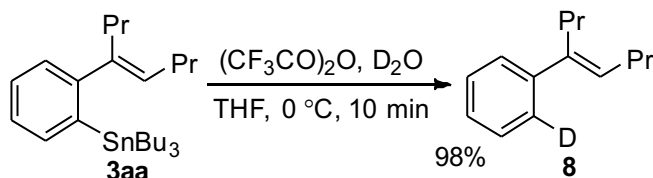

Deuterodestannylation of **3aa** was carried out according to a reported procedure.<sup>12</sup> To a mixture of trifluoroacetic anhydride (3.02g, 14.4 mmol) and **3aa** (85.9 mg, 0.18 mmol) in THF (1.0 mL) at 0 °C was added deuterium oxide (0.27 g, 13.5 mmol). The mixture was stirred at 0 °C for 10 min and was neutralized by addition of 6 N aqueous sodium hydroxide. The mixture was extracted with Et<sub>2</sub>O, and the combined organic layer was dried over MgSO<sub>4</sub> and concentrated under reduced pressure. The residue was subjected to chromatography on silica gel to give (*E*)-4-(2-deuteriophenyl)oct-4-ene (**8**) (98%, 33.5 mg, 0.18 mmol) as colorless oil.

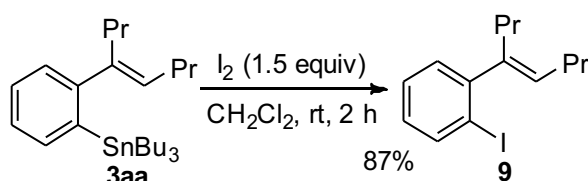

Iododestannylation of **3aa** was carried out according to a reported procedure<sup>11</sup> with minor modifications. An oven-dried flask was charged with **3aa** (114.7 mg, 0.24 mmol), I<sub>2</sub> (91.4 mg, 0.36 mmol) and CH<sub>2</sub>Cl<sub>2</sub> (5.0 mL). The mixture was stirred at room temperature for 2 h before saturated aqueous solution of Na<sub>2</sub>S<sub>2</sub>O<sub>3</sub> (3.0 mL) was added. The mixture was extracted with Et<sub>2</sub>O, and the combined organic layer was dried over MgSO<sub>4</sub> and concentrated under reduced pressure. The residue was subjected to chromatography on silica gel (pre-treated with 1% Et<sub>3</sub>N in hexanes) to give (*E*)-4-(2-iodophenyl)oct-4-ene (**9**) (87%, 65.5 mg, 0.21 mmol) as colorless oil.

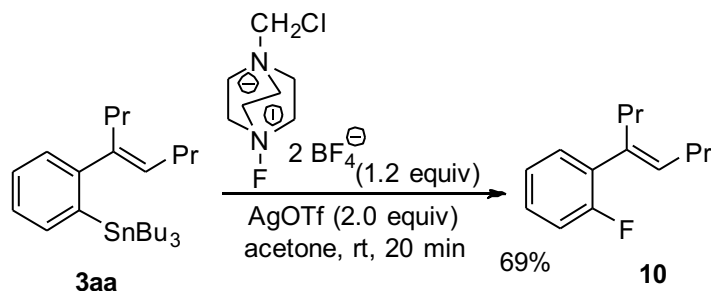

Fluorodestannylation of **3aa** was carried out according to a reported procedure.<sup>13</sup> Under nitrogen at room temperature, to a solution of **3aa** (90.6 mg, 0.19 mmol) in dry acetone (2.0 mL) was added silver triflate (97.6 mg, 0.38 mmol) and 1-chloromethyl-4-fluoro-1,4-diazoniabicyclo[2.2.2]octane

## Electronic Supplementary Information (ESI)

bis(tetrafluoroborate) (80.9 mg, 0.23 mmol). The mixture was stirred at room temperature for 20 min, and it was passed through a short pad of silica gel with ethyl acetate as the eluent. The solvent was removed on a rotary evaporator. The residue was subjected to chromatography on silica gel to give (*E*)-4-(2-fluorophenyl)oct-4-ene (**10**) (69%, 27.1 mg, 0.13 mmol) as colorless oil.

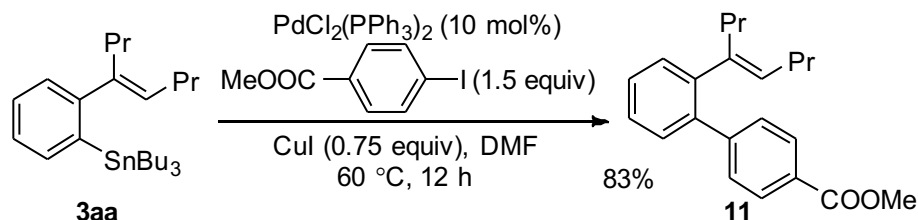

The cross-coupling of **3aa** was performed according to a reported procedure<sup>14</sup> with some modifications. Under nitrogen, **3aa** (95.5 mg, 0.20 mmol), methyl 4-iodobenzoate (78.6 mg, 0.30 mmol),  $\text{PdCl}_2(\text{PPh}_3)_2$  (14.0 mg, 0.020 mmol, 10 mol%) and  $\text{CuI}$  (28.6 mg, 0.15 mmol) were placed in a 10 mL Schlenk tube. DMF (4.0 mL) was added by syringe and the mixture was allowed to stir at 60 °C for 12 h. The mixture was passed through a short pad of silica gel with ethyl acetate as the eluent. The solvent was removed on a rotary evaporator. The residue was subjected to chromatography on silica gel to give (*E*)-4-(2-(4-methoxycarbonylphenyl)phenyl)oct-4-ene (**11**) (83%, 53.5 mg, 0.17 mmol) as pale yellow oil.

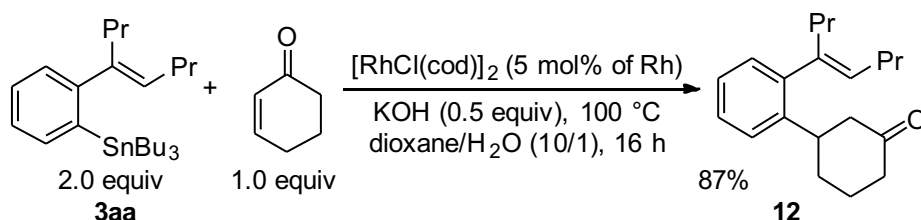

$[\text{RhCl}(\text{cod})]_2$  (2.46 mg, 0.0050 mmol, 5 mol% of Rh), **3aa** (190.9 mg, 0.40 mmol), 2-cyclohexenone (19.2 mg, 0.20 mmol) and  $\text{KOH}$  (5.61 mg, 0.10 mmol) were placed in a 10 mL Schlenk tube under nitrogen. Dioxane (1.0 mL) and water (0.1 mL) were added by syringe, and the mixture was heated at 100 °C for 16 h. The mixture was passed through a short pad of silica gel with ethyl acetate as the eluent. The solvent was removed on a rotary evaporator. The residue was subjected to chromatography on silica gel to give the product **12** (87%, 49.5 mg, 0.17 mmol) as colorless oil.

9. Characterization of the products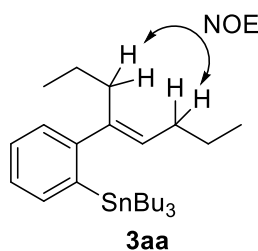

**Compound 3aa.** (Table 2, entry 1, 85% yield, colorless oil,  $R_f$  = 0.9 (hexanes)). The *E* geometry was assigned by NOESY NMR study.  **$^1\text{H}$  NMR** (400 MHz,  $\text{CDCl}_3$ )  $\delta$  0.88 (t,  $J_{\text{H,H}}$  = 7.3 Hz, 9H), 0.90 (t,  $J_{\text{H,H}}$  = 7.2 Hz, 3H), 0.97 (t,  $J_{\text{H,H}}$  = 7.3 Hz, 3H), 0.99 (t,  $J_{\text{H,H}}$  = 8.0 Hz,  $J_{\text{H},^{119}\text{Sn}}$  = 51.4 Hz, 6H), 1.32 (sext,  $J_{\text{H,H}}$  = 7.2 Hz, 6H+2H), 1.42–1.54 (m, 8H), 2.14 (q,  $J_{\text{H,H}}$  = 7.5 Hz, 2H), 2.32 (t,  $J_{\text{H,H}}$  = 8.0 Hz, 2H), 5.27 (t,  $J_{\text{H,H}}$  = 7.0 Hz, 1H), 7.15 (d,  $J_{\text{H,H}}$  = 7.4 Hz, 1H), 7.18 (td,  $J_{\text{H,H}}$  = 7.1 Hz, 1.5 Hz, 1H), 7.23 (td,  $J_{\text{H,H}}$  = 7.3 Hz, 1.6 Hz, 1H), 7.42 (dd,  $J_{\text{H,H}}$  = 7.0 Hz, 1.2 Hz,  $J_{\text{H},^{119}\text{Sn}}$  = 42.9 Hz, 1H);  **$^{13}\text{C}$  NMR** (100 MHz,  $\text{CDCl}_3$ )  $\delta$  10.9 ( $J_{\text{C},^{119}\text{Sn}}$  = 339.7 Hz,  $J_{\text{C},^{117}\text{Sn}}$  = 324.5 Hz), 13.6, 14.1, 14.4, 21.6, 22.9, 27.5 ( $J_{\text{C},^{119}\text{Sn}}$  = 60.9 Hz), 29.2 ( $J_{\text{C},^{119}\text{Sn}}$  = 18.9 Hz), 30.6, 34.9, 125.6 ( $J_{\text{C},^{119}\text{Sn}}$  = 42.4 Hz), 127.4 ( $J_{\text{C},^{119}\text{Sn}}$  = 9.6 Hz), 127.9 ( $J_{\text{C},^{119}\text{Sn}}$  = 35.0 Hz), 129.5, 136.9 ( $J_{\text{C},^{119}\text{Sn}}$  = 32.7 Hz), 140.7 ( $J_{\text{C},^{119}\text{Sn}}$  = 412.3 Hz,  $J_{\text{C},^{117}\text{Sn}}$  = 393.8 Hz), 144.3 ( $J_{\text{C},^{119}\text{Sn}}$  = 14.6 Hz), 152.7 ( $J_{\text{C},^{119}\text{Sn}}$  = 28.4 Hz). **HRMS** (ESI) calcd for  $\text{C}_{26}\text{H}_{46}\text{Na}^{120}\text{Sn}$   $[\text{M}+\text{Na}]^+$  501.2519, found 501.2537.

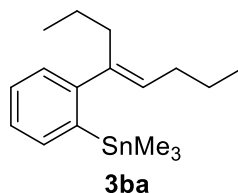

**Compound 3ba.** (Table 2, entry 2, 77% yield, colorless oil,  $R_f$  = 0.9 (hexanes)).  **$^1\text{H}$  NMR** (400 MHz,  $\text{CDCl}_3$ )  $\delta$  0.24 (t,  $J_{\text{H},^{119}\text{Sn}}$  = 53.0 Hz, 9H), 0.91 (t,  $J_{\text{H,H}}$  = 7.3 Hz, 3H), 0.97 (t,  $J_{\text{H,H}}$  = 7.4 Hz, 3H), 1.37 (sext,  $J_{\text{H,H}}$  = 7.8 Hz, 2H), 1.46 (sext,  $J_{\text{H,H}}$  = 7.4 Hz, 2H), 2.15 (q,  $J_{\text{H,H}}$  = 7.4 Hz, 2H), 2.34 (t,  $J_{\text{H,H}}$  = 8.1 Hz, 2H), 5.31 (t,  $J_{\text{H,H}}$  = 7.1 Hz, 1H), 7.19 (d,  $J_{\text{H,H}}$  = 7.5 Hz, 1H), 7.22 (t,  $J_{\text{H,H}}$  = 6.9 Hz, 1H), 7.24–7.28 (m, 1H), 7.47 (d,  $J_{\text{H,H}}$  = 6.9 Hz,  $J_{\text{H},^{119}\text{Sn}}$  = 49.4 Hz, 1H);  **$^{13}\text{C}$  NMR** (100 MHz,  $\text{CDCl}_3$ )  $\delta$  –7.4 ( $J_{\text{C},^{119}\text{Sn}}$  = 350.4 Hz,  $J_{\text{C},^{117}\text{Sn}}$  = 334.8 Hz), 14.1, 14.5, 21.6, 22.9, 30.5, 34.8, 125.9 ( $J_{\text{C},^{119}\text{Sn}}$  = 47.8 Hz), 127.6 ( $J_{\text{C},^{119}\text{Sn}}$  = 38.2 Hz), 127.8 ( $J_{\text{C},^{119}\text{Sn}}$  = 9.5 Hz), 130.0, 136.3 ( $J_{\text{C},^{119}\text{Sn}}$  = 38.6 Hz), 141.0 ( $J_{\text{C},^{119}\text{Sn}}$  = 497.6 Hz,  $J_{\text{C},^{117}\text{Sn}}$  = 475.1 Hz), 144.2 ( $J_{\text{C},^{119}\text{Sn}}$  = 16.4 Hz), 152.4 ( $J_{\text{C},^{119}\text{Sn}}$  = 31.1 Hz). **HRMS** (ESI) calcd for  $\text{C}_{17}\text{H}_{28}\text{Na}^{120}\text{Sn}$   $[\text{M}+\text{Na}]^+$  375.1111, found 375.1118.

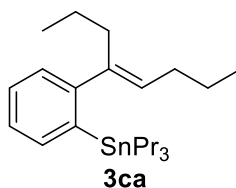

**Compound 3ca.** (Table 2, entry 3, 89% yield, colorless oil,  $R_f$  = 0.9 (hexanes)).  $^1\text{H NMR}$  (400 MHz,  $\text{CDCl}_3$ )  $\delta$  0.90 (t,  $J_{\text{H,H}}$  = 7.3 Hz, 3H), 0.96 (t,  $J_{\text{H,H}}$  = 7.2 Hz, 9H), 0.98 (t,  $J_{\text{H,H}}$  = 7.4 Hz, 3H), 1.00 (t,  $J_{\text{H,H}}$  = 8.3 Hz,  $J_{\text{H},^{119}\text{Sn}}$  = 50.8 Hz, 6H), 1.36 (sext,  $J_{\text{H,H}}$  = 7.6 Hz, 2H), 1.47 (sext,  $J_{\text{H,H}}$  = 7.5 Hz, 2H), 1.55 (sext,  $J_{\text{H,H}}$  = 7.7 Hz, 6H), 2.14 (q,  $J_{\text{H,H}}$  = 7.4 Hz, 2H), 2.32 (t,  $J_{\text{H,H}}$  = 8.0 Hz, 2H), 5.27 (t,  $J_{\text{H,H}}$  = 7.0 Hz, 1H), 7.16 (dd,  $J_{\text{H,H}}$  = 7.6 Hz, 1.3 Hz, 1H), 7.18 (td,  $J_{\text{H,H}}$  = 7.1 Hz, 1.6 Hz, 1H), 7.23 (td,  $J_{\text{H,H}}$  = 7.3 Hz, 1.6 Hz, 1H), 7.43 (dd,  $J_{\text{H,H}}$  = 7.0 Hz, 1.4 Hz,  $J_{\text{H},^{119}\text{Sn}}$  = 43.0 Hz, 1H);  $^{13}\text{C NMR}$  (100 MHz,  $\text{CDCl}_3$ )  $\delta$  13.9 ( $J_{\text{C},^{119}\text{Sn}}$  = 339.0 Hz,  $J_{\text{C},^{117}\text{Sn}}$  = 323.8 Hz), 14.1, 14.4, 19.1 ( $J_{\text{C},^{119}\text{Sn}}$  = 62.6 Hz,  $J_{\text{C},^{117}\text{Sn}}$  = 59.2 Hz), 20.4 ( $J_{\text{C},^{119}\text{Sn}}$  = 18.6 Hz), 21.6, 22.9, 30.6, 34.9, 125.6 ( $J_{\text{C},^{119}\text{Sn}}$  = 41.0 Hz), 127.5 ( $J_{\text{C},^{119}\text{Sn}}$  = 9.5 Hz), 128.0 ( $J_{\text{C},^{119}\text{Sn}}$  = 35.1 Hz), 129.5, 136.9 ( $J_{\text{C},^{119}\text{Sn}}$  = 32.4 Hz), 140.7 ( $J_{\text{C},^{119}\text{Sn}}$  = 412.6 Hz,  $J_{\text{C},^{117}\text{Sn}}$  = 394.1 Hz), 144.3 ( $J_{\text{C},^{119}\text{Sn}}$  = 14.7 Hz), 152.7 ( $J_{\text{C},^{119}\text{Sn}}$  = 27.7 Hz). **HRMS** (ESI) calcd for  $\text{C}_{23}\text{H}_{40}\text{Na}^{120}\text{Sn} [\text{M}+\text{Na}]^+$  459.2059, found 459.2050.

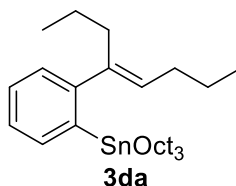

**Compound 3da.** (Table 2, entry 4, 78% yield, colorless oil,  $R_f$  = 0.9 (hexanes)).  $^1\text{H NMR}$  (400 MHz,  $\text{CDCl}_3$ )  $\delta$  0.88 (t,  $J_{\text{H,H}}$  = 7.0 Hz, 9H), 0.90 (t,  $J_{\text{H,H}}$  = 7.2 Hz, 3H), 0.97 (t,  $J_{\text{H,H}}$  = 7.2 Hz, 3H), 0.98 (t,  $J_{\text{H,H}}$  = 8.3 Hz,  $J_{\text{H},^{119}\text{Sn}}$  = 50.7 Hz, 6H), 1.20–1.40 (br m, 32H), 1.41–1.60 (m, 8H), 2.14 (q,  $J_{\text{H,H}}$  = 7.4 Hz, 2H), 2.31 (t,  $J_{\text{H,H}}$  = 8.0 Hz, 2H), 5.26 (t,  $J_{\text{H,H}}$  = 7.0 Hz, 1H), 7.15 (d,  $J_{\text{H,H}}$  = 7.6 Hz, 1H), 7.17 (td,  $J_{\text{H,H}}$  = 7.1 Hz, 1.5 Hz, 1H), 7.22 (td,  $J_{\text{H,H}}$  = 7.3 Hz, 1.6 Hz, 1H), 7.41 (dd,  $J_{\text{H,H}}$  = 7.0 Hz, 1.3 Hz,  $J_{\text{H},^{119}\text{Sn}}$  = 42.8 Hz, 1H);  $^{13}\text{C NMR}$  (100 MHz,  $\text{CDCl}_3$ )  $\delta$  11.2 ( $J_{\text{C},^{119}\text{Sn}}$  = 339.2 Hz,  $J_{\text{C},^{117}\text{Sn}}$  = 323.0 Hz), 14.09, 14.13, 14.4, 21.6, 22.7, 23.0, 26.9 ( $J_{\text{C},^{119}\text{Sn}}$  = 18.6 Hz), 29.2, 29.3, 30.6, 31.9, 34.5 ( $J_{\text{C},^{119}\text{Sn}}$  = 58.1 Hz), 34.9, 125.6 ( $J_{\text{C},^{119}\text{Sn}}$  = 41.7 Hz), 127.4, 127.9, 129.5, 136.9 ( $J_{\text{C},^{119}\text{Sn}}$  = 32.9 Hz), 140.8, 144.3, 152.7. **HRMS** (ESI) calcd for  $\text{C}_{38}\text{H}_{71}^{120}\text{Sn} [\text{M}+\text{H}]^+$  647.4578, found 647.4565.

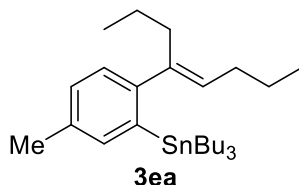

**Compound 3ea.** (Table 2, entry 5, 87% yield, colorless oil,  $R_f$  = 0.9 (hexanes)).  $^1\text{H NMR}$  (400 MHz,  $\text{CDCl}_3$ )  $\delta$  0.88 (t,  $J_{\text{H,H}}$  = 7.3 Hz, 9H), 0.89 (t,  $J_{\text{H,H}}$  = 7.3 Hz, 3H), 0.96 (t,  $J_{\text{H,H}}$  = 7.3 Hz, 3H), 0.98



## Electronic Supplementary Information (ESI)

(t,  $J_{\text{H,H}} = 7.8$  Hz,  $J_{\text{H},^{119}\text{Sn}} = 49.6$  Hz, 6H), 1.32 (sext,  $J_{\text{H,H}} = 7.3$  Hz, 6H), 1.28–1.40 (m, 2H), 1.41–1.54 (m, 8H), 2.12 (q,  $J_{\text{H,H}} = 7.4$  Hz, 2H), 2.30 (t,  $J_{\text{H,H}} = 8.2$  Hz, 2H), 2.32 (s, 3H), 5.25 (t,  $J_{\text{H,H}} = 7.0$  Hz, 1H), 7.02–7.08 (m, 2H), 7.21 (s,  $J_{\text{H},^{119}\text{Sn}} = 44.3$  Hz, 1H);  $^{13}\text{C}$  NMR (100 MHz,  $\text{CDCl}_3$ )  $\delta$  10.8 ( $J_{\text{C},^{119}\text{Sn}} = 338.7$  Hz,  $J_{\text{C},^{117}\text{Sn}} = 323.7$  Hz), 13.6, 14.1, 14.4, 21.1, 21.6, 23.0, 27.5 ( $J_{\text{C},^{119}\text{Sn}} = 62.3$  Hz,  $J_{\text{C},^{117}\text{Sn}} = 59.4$  Hz), 29.2 ( $J_{\text{C},^{119}\text{Sn}} = 18.7$  Hz), 30.6, 35.0, 127.7 ( $J_{\text{C},^{119}\text{Sn}} = 37.0$  Hz), 128.3, 129.4, 134.8, 137.6, 140.5, 144.1, 149.8. **HRMS** (ESI) calcd for  $\text{C}_{27}\text{H}_{48}\text{Na}^{120}\text{Sn}$  [ $\text{M}+\text{Na}$ ] $^+$  515.2676, found 515.2684.

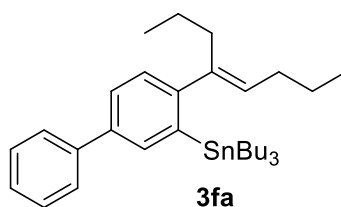

**Compound 3fa.** (Table 2, entry 6, 91% yield, colorless oil,  $R_f = 0.8$  (hexanes)).  $^1\text{H}$  NMR (400 MHz,  $\text{CDCl}_3$ )  $\delta$  0.89 (t,  $J_{\text{H,H}} = 7.3$  Hz, 9H), 0.92 (t,  $J_{\text{H,H}} = 7.4$  Hz, 3H), 0.98 (t,  $J_{\text{H,H}} = 7.4$  Hz, 3H), 1.02 (t,  $J_{\text{H,H}} = 8.3$  Hz,  $J_{\text{H},^{119}\text{Sn}} = 47.2$  Hz, 6H), 1.33 (sext,  $J_{\text{H,H}} = 7.3$  Hz, 6H), 1.32–1.42 (m, 2H), 1.44–1.55 (m, 8H), 2.16 (q,  $J_{\text{H,H}} = 7.4$  Hz, 2H), 2.35 (t,  $J_{\text{H,H}} = 8.0$  Hz, 2H), 5.32 (t,  $J_{\text{H,H}} = 7.0$  Hz, 1H), 7.23 (d,  $J_{\text{H,H}} = 8.0$  Hz,  $J_{\text{H},^{119}\text{Sn}} = 16.0$  Hz, 1H), 7.32 (t,  $J_{\text{H,H}} = 7.3$  Hz, 1H), 7.43 (t,  $J_{\text{H,H}} = 7.7$  Hz, 2H), 7.45 (d,  $J_{\text{H,H}} = 8.0$  Hz, 1H), 7.58 (d,  $J_{\text{H,H}} = 7.1$  Hz, 2H), 7.63 (d,  $J_{\text{H,H}} = 1.9$  Hz,  $J_{\text{H},^{119}\text{Sn}} = 43.6$  Hz, 1H);  $^{13}\text{C}$  NMR (100 MHz,  $\text{CDCl}_3$ )  $\delta$  11.0 ( $J_{\text{C},^{119}\text{Sn}} = 339.7$  Hz,  $J_{\text{C},^{117}\text{Sn}} = 324.9$  Hz), 13.7, 14.1, 14.5, 21.7, 23.0, 27.5 ( $J_{\text{C},^{119}\text{Sn}} = 61.4$  Hz), 29.2 ( $J_{\text{C},^{119}\text{Sn}} = 18.7$  Hz), 30.6, 34.9, 126.4 ( $J_{\text{C},^{119}\text{Sn}} = 9.7$  Hz), 126.9, 127.1, 128.1 ( $J_{\text{C},^{119}\text{Sn}} = 36.1$  Hz), 128.7, 129.7, 135.6 ( $J_{\text{C},^{119}\text{Sn}} = 32.9$  Hz), 138.2, 141.3, 141.5, 144.0 ( $J_{\text{C},^{119}\text{Sn}} = 13.9$  Hz), 151.8. **HRMS** (ESI) calcd for  $\text{C}_{32}\text{H}_{50}\text{Na}^{120}\text{Sn}$  [ $\text{M}+\text{Na}$ ] $^+$  577.2832, found 577.2823.

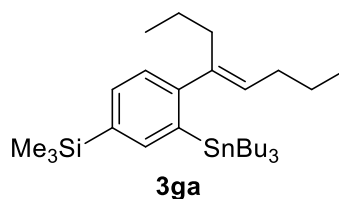

**Compound 3ga.** (Table 2, entry 7, 83% yield, colorless oil,  $R_f = 0.9$  (hexanes)).  $^1\text{H}$  NMR (400 MHz,  $\text{CDCl}_3$ )  $\delta$  0.26 (s, 9H), 0.89 (t,  $J_{\text{H,H}} = 7.2$  Hz, 9H+3H), 0.96 (t,  $J_{\text{H,H}} = 7.4$  Hz, 3H), 0.99 (t,  $J_{\text{H,H}} = 8.4$  Hz,  $J_{\text{H},^{119}\text{Sn}} = 48.8$  Hz, 6H), 1.33 (sext,  $J_{\text{H,H}} = 7.3$  Hz, 6H+2H), 1.43–1.53 (m, 8H), 2.14 (q,  $J_{\text{H,H}} = 7.4$  Hz, 2H), 2.32 (t,  $J_{\text{H,H}} = 8.0$  Hz, 2H), 5.27 (t,  $J_{\text{H,H}} = 7.0$  Hz, 1H), 7.15 (d,  $J_{\text{H,H}} = 7.5$  Hz,  $J_{\text{H},^{119}\text{Sn}} = 15.0$  Hz, 1H), 7.39 (dd,  $J_{\text{H,H}} = 7.5$  Hz, 1.4 Hz, 1H), 7.58 (s,  $J_{\text{H},^{119}\text{Sn}} = 42.3$  Hz, 1H);  $^{13}\text{C}$  NMR (100 MHz,  $\text{CDCl}_3$ )  $\delta$  -1.0, 11.0 ( $J_{\text{C},^{119}\text{Sn}} = 337.9$  Hz,  $J_{\text{C},^{117}\text{Sn}} = 322.1$  Hz), 13.7, 14.1, 14.4, 21.7, 22.9, 27.5 ( $J_{\text{C},^{119}\text{Sn}} = 60.1$  Hz), 29.2 ( $J_{\text{C},^{119}\text{Sn}} = 19.5$  Hz), 30.6, 34.8, 127.2, 129.7, 132.6, 136.7, 139.7, 142.2, 144.3, 153.1. **HRMS** (ESI) calcd for  $\text{C}_{29}\text{H}_{54}\text{NaSi}^{120}\text{Sn}$  [ $\text{M}+\text{Na}$ ] $^+$  573.2914, found 573.2903.

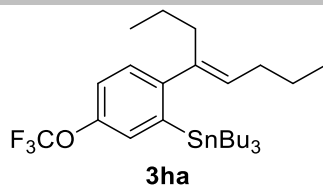

**Compound 3ha.** (Table 2, entry 8, 83% yield, colorless oil,  $R_f$  = 0.8 (hexanes)).  $^1\text{H NMR}$  (400 MHz,  $\text{CDCl}_3$ )  $\delta$  0.88 (t,  $J_{\text{H,H}}$  = 7.2 Hz, 9H), 0.90 (t,  $J_{\text{H,H}}$  = 7.1 Hz, 3H), 0.97 (t,  $J_{\text{H,H}}$  = 7.4 Hz, 3H), 1.01 (t,  $J_{\text{H,H}}$  = 8.2 Hz,  $J_{\text{H},^{119}\text{Sn}}$  = 49.9 Hz, 6H), 1.32 (sext,  $J_{\text{H,H}}$  = 7.2 Hz, 6H+2H), 1.43–1.54 (m, 8H), 2.13 (q,  $J_{\text{H,H}}$  = 7.4 Hz, 2H), 2.30 (t,  $J_{\text{H,H}}$  = 8.0 Hz, 2H), 5.27 (t,  $J_{\text{H,H}}$  = 7.1 Hz, 1H), 7.04 (dd,  $J_{\text{H,H}}$  = 8.4 Hz, 1.4 Hz, 1H), 7.14 (d,  $J_{\text{H,H}}$  = 8.4 Hz,  $J_{\text{H},^{119}\text{Sn}}$  = 16.5 Hz, 1H), 7.23 (d,  $J_{\text{H,H}}$  = 1.5 Hz,  $J_{\text{H},^{119}\text{Sn}}$  = 43.4 Hz, 1H);  $^{13}\text{C NMR}$  (100 MHz,  $\text{CDCl}_3$ )  $\delta$  11.0 ( $J_{\text{C},^{119}\text{Sn}}$  = 343.7 Hz,  $J_{\text{C},^{117}\text{Sn}}$  = 328.4 Hz), 13.6, 14.1, 14.3, 21.5, 22.9, 27.4 ( $J_{\text{C},^{119}\text{Sn}}$  = 62.7 Hz,  $J_{\text{C},^{117}\text{Sn}}$  = 59.2 Hz), 29.0 ( $J_{\text{C},^{119}\text{Sn}}$  = 19.2 Hz), 30.6, 34.9, 119.7, 120.6 (q,  $J_{\text{C},^{19}\text{F}}$  = 256.5 Hz), 128.6 ( $J_{\text{C},^{119}\text{Sn}}$  = 34.4 Hz), 128.9 ( $J_{\text{C},^{119}\text{Sn}}$  = 37.0 Hz), 130.2, 143.3 ( $J_{\text{C},^{119}\text{Sn}}$  = 13.1 Hz), 143.4 ( $J_{\text{C},^{119}\text{Sn}}$  = 380.6 Hz,  $J_{\text{C},^{117}\text{Sn}}$  = 343.7 Hz), 147.3, 151.2 ( $J_{\text{C},^{119}\text{Sn}}$  = 25.0 Hz). **HRMS** (ESI) calcd for  $\text{C}_{27}\text{H}_{45}\text{F}_3\text{ONa}^{120}\text{Sn} [\text{M}+\text{Na}]^+$  585.2342, found 585.2335.

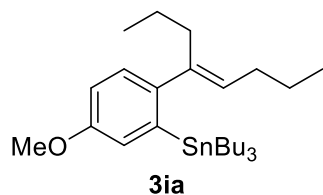

**Compound 3ia.** (Table 2, entry 9, 65% yield, colorless oil,  $R_f$  = 0.8 (hexanes)).  $^1\text{H NMR}$  (400 MHz,  $\text{CDCl}_3$ )  $\delta$  0.88 (t,  $J_{\text{H,H}}$  = 7.3 Hz, 9H), 0.89 (t,  $J_{\text{H,H}}$  = 7.3 Hz, 3H), 0.96 (t,  $J_{\text{H,H}}$  = 7.4 Hz, 3H), 0.98 (t,  $J_{\text{H,H}}$  = 8.4 Hz,  $J_{\text{H},^{119}\text{Sn}}$  = 50.5 Hz, 6H), 1.32 (sext,  $J_{\text{H,H}}$  = 7.3 Hz, 6H+2H), 1.42–1.52 (m, 8H), 2.11 (q,  $J_{\text{H,H}}$  = 7.4 Hz, 2H), 2.29 (t,  $J_{\text{H,H}}$  = 8.0 Hz, 2H), 3.80 (s, 3H), 5.24 (t,  $J_{\text{H,H}}$  = 7.0 Hz, 1H), 6.76 (dd,  $J_{\text{H,H}}$  = 8.4 Hz, 2.8 Hz, 1H), 6.97 (d,  $J_{\text{H,H}}$  = 2.8 Hz,  $J_{\text{H},^{119}\text{Sn}}$  = 46.6 Hz, 1H), 7.09 (d,  $J_{\text{H,H}}$  = 8.4 Hz,  $J_{\text{H},^{119}\text{Sn}}$  = 17.6 Hz, 1H);  $^{13}\text{C NMR}$  (100 MHz,  $\text{CDCl}_3$ )  $\delta$  10.9 ( $J_{\text{C},^{119}\text{Sn}}$  = 340.5 Hz,  $J_{\text{C},^{117}\text{Sn}}$  = 325.5 Hz), 13.6, 14.1, 14.4, 21.6, 23.0, 27.5 ( $J_{\text{C},^{119}\text{Sn}}$  = 60.6 Hz), 29.1 ( $J_{\text{C},^{119}\text{Sn}}$  = 18.9 Hz), 30.6, 35.0, 55.1, 112.2, 122.4, 128.6, 129.3, 142.2, 143.8, 145.2, 157.2. **HRMS** (ESI) calcd for  $\text{C}_{27}\text{H}_{48}\text{ONa}^{120}\text{Sn} [\text{M}+\text{Na}]^+$  531.2625, found 531.2617.

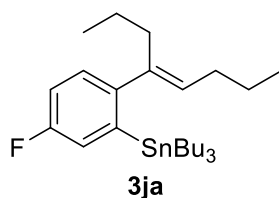

**Compound 3ja.** (Table 2, entry 10, 77% yield, colorless oil,  $R_f$  = 0.8 (hexanes)).  $^1\text{H NMR}$  (400 MHz,  $\text{CDCl}_3$ )  $\delta$  0.886 (t,  $J_{\text{H,H}}$  = 7.3 Hz, 9H), 0.894 (t,  $J_{\text{H,H}}$  = 7.3 Hz, 3H), 0.97 (t,  $J_{\text{H,H}}$  = 7.4 Hz, 3H), 0.99 (t,  $J_{\text{H,H}}$  = 8.3 Hz,  $J_{\text{H},^{119}\text{Sn}}$  = 50.9 Hz, 6H), 1.32 (sext,  $J_{\text{H,H}}$  = 7.3 Hz, 6H), 1.27–1.37 (m, 2H), 1.41–1.53 (m, 8H), 2.12 (q,  $J_{\text{H,H}}$  = 7.4 Hz, 2H), 2.28 (t,  $J_{\text{H,H}}$  = 8.0 Hz, 2H), 5.24 (t,  $J_{\text{H,H}}$  = 7.0 Hz, 1H), 6.88

## Electronic Supplementary Information (ESI)

(td,  $J_{\text{H,H}} = J_{\text{H},^{19}\text{F}} = 8.6$  Hz, 2.8 Hz, 1H), 7.09 (dd,  $J_{\text{H,H}} = 2.0$  Hz,  $J_{\text{H},^{19}\text{F}} = 8.4$  Hz,  $J_{\text{H},^{119}\text{Sn}} = 43.6$  Hz, 1H), 7.10 (d,  $J_{\text{H,H}} = 8.3$  Hz, 1H);  $^{13}\text{C}$  NMR (100 MHz,  $\text{CDCl}_3$ )  $\delta$  10.9 ( $J_{\text{C},^{119}\text{Sn}} = 343.0$  Hz,  $J_{\text{C},^{117}\text{Sn}} = 327.7$  Hz), 13.6, 14.1, 14.4, 21.5, 22.9, 27.4 ( $J_{\text{C},^{119}\text{Sn}} = 61.7$  Hz), 29.1 ( $J_{\text{C},^{119}\text{Sn}} = 19.1$  Hz), 30.6, 35.0, 114.0 (d,  $J_{\text{C},^{19}\text{F}} = 20.9$  Hz,  $J_{\text{C},^{119}\text{Sn}} = 8.7$  Hz), 122.7 (d,  $J_{\text{C},^{19}\text{F}} = 17.5$  Hz,  $J_{\text{C},^{119}\text{Sn}} = 34.1$  Hz), 129.2 (d,  $J_{\text{C},^{19}\text{F}} = 6.5$  Hz,  $J_{\text{C},^{119}\text{Sn}} = 39.4$  Hz), 129.9, 143.4 ( $J_{\text{C},^{119}\text{Sn}} = 13.2$  Hz), 143.6 (d,  $J_{\text{C},^{19}\text{F}} = 2.1$  Hz), 148.4 (d,  $J_{\text{C},^{19}\text{F}} = 3.1$  Hz,  $J_{\text{C},^{119}\text{Sn}} = 25.8$  Hz), 161.1 (d,  $J_{\text{C},^{19}\text{F}} = 248.6$  Hz). **HRMS** (ESI) calcd for  $\text{C}_{26}\text{H}_{45}\text{FNa}^{120}\text{Sn}$   $[\text{M}+\text{Na}]^+$  519.2425, found 519.2407.

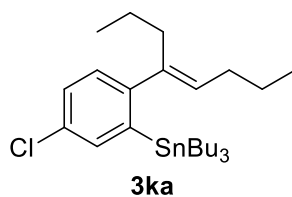

**Compound 3ka.** (Table 2, entry 12, 84% yield, colorless oil,  $R_f = 0.8$  (hexanes)).  $^1\text{H}$  NMR (400 MHz,  $\text{CDCl}_3$ )  $\delta$  0.89 (t,  $J_{\text{H,H}} = 7.3$  Hz, 9H+3H), 0.96 (t,  $J_{\text{H,H}} = 7.3$  Hz, 3H), 1.00 (t,  $J_{\text{H,H}} = 8.3$  Hz,  $J_{\text{H},^{119}\text{Sn}} = 51.7$  Hz, 6H), 1.32 (sext,  $J_{\text{H,H}} = 7.3$  Hz, 6H+2H), 1.42–1.51 (m, 8H), 2.12 (q,  $J_{\text{H,H}} = 7.4$  Hz, 2H), 2.28 (t,  $J_{\text{H,H}} = 8.0$  Hz, 2H), 5.25 (t,  $J_{\text{H,H}} = 7.0$  Hz, 1H), 7.06 (d,  $J_{\text{H,H}} = 8.2$  Hz,  $J_{\text{H},^{119}\text{Sn}} = 16.2$  Hz, 1H), 7.18 (dd,  $J_{\text{H,H}} = 8.2$  Hz, 2.3 Hz, 1H), 7.34 (d,  $J_{\text{H,H}} = 2.3$  Hz,  $J_{\text{H},^{119}\text{Sn}} = 42.1$  Hz, 1H);  $^{13}\text{C}$  NMR (100 MHz,  $\text{CDCl}_3$ )  $\delta$  10.9 ( $J_{\text{C},^{119}\text{Sn}} = 342.6$  Hz,  $J_{\text{C},^{117}\text{Sn}} = 327.6$  Hz), 13.6, 14.1, 14.4, 21.5, 22.9, 27.4 ( $J_{\text{C},^{119}\text{Sn}} = 62.1$  Hz), 29.1 ( $J_{\text{C},^{119}\text{Sn}} = 19.0$  Hz), 30.5, 34.8, 127.4 ( $J_{\text{C},^{119}\text{Sn}} = 8.5$  Hz), 129.2 ( $J_{\text{C},^{119}\text{Sn}} = 35.7$  Hz), 130.0, 132.0 ( $J_{\text{C},^{119}\text{Sn}} = 53.4$  Hz), 136.1 ( $J_{\text{C},^{119}\text{Sn}} = 34.6$  Hz), 143.3 ( $J_{\text{C},^{119}\text{Sn}} = 13.0$  Hz), 143.4, 150.8 ( $J_{\text{C},^{119}\text{Sn}} = 25.4$  Hz). **HRMS** (ESI) calcd for  $\text{C}_{26}\text{H}_{45}\text{NaCl}^{120}\text{Sn}$   $[\text{M}+\text{Na}]^+$  535.2129, found 535.2140.

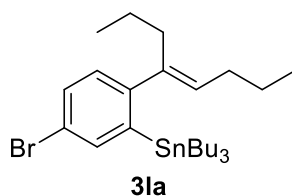

**Compound 3la.** (Table 2, entry 14, 78% yield, colorless oil,  $R_f = 0.8$  (hexanes)).  $^1\text{H}$  NMR (400 MHz,  $\text{CDCl}_3$ )  $\delta$  0.89 (t,  $J_{\text{H,H}} = 7.3$  Hz, 9H+3H), 0.96 (t,  $J_{\text{H,H}} = 7.3$  Hz, 3H), 1.00 (t,  $J_{\text{H,H}} = 8.3$  Hz,  $J_{\text{H},^{119}\text{Sn}} = 51.2$  Hz, 6H), 1.32 (sext,  $J_{\text{H,H}} = 7.3$  Hz, 6H+2H), 1.42–1.51 (m, 8H), 2.12 (q,  $J_{\text{H,H}} = 7.3$  Hz, 2H), 2.28 (t,  $J_{\text{H,H}} = 8.0$  Hz, 2H), 5.26 (t,  $J_{\text{H,H}} = 7.0$  Hz, 1H), 7.00 (d,  $J_{\text{H,H}} = 8.1$  Hz,  $J_{\text{H},^{119}\text{Sn}} = 16.1$  Hz, 1H), 7.32 (dd,  $J_{\text{H,H}} = 8.2$  Hz, 2.2 Hz, 1H), 7.48 (d,  $J_{\text{H,H}} = 2.1$  Hz,  $J_{\text{H},^{119}\text{Sn}} = 41.4$  Hz, 1H);  $^{13}\text{C}$  NMR (100 MHz,  $\text{CDCl}_3$ )  $\delta$  11.0 ( $J_{\text{C},^{119}\text{Sn}} = 343.0$  Hz,  $J_{\text{C},^{117}\text{Sn}} = 327.1$  Hz), 13.6, 14.1, 14.4, 21.5, 22.9, 27.4 ( $J_{\text{C},^{119}\text{Sn}} = 61.5$  Hz), 29.1 ( $J_{\text{C},^{119}\text{Sn}} = 19.2$  Hz), 30.5, 34.8, 120.7, 129.7, 130.0, 130.3, 139.0, 143.3, 144.1, 151.2. **HRMS** (ESI) calcd for  $\text{C}_{26}\text{H}_{45}\text{NaBr}^{120}\text{Sn}$   $[\text{M}+\text{Na}]^+$  579.1624, found 579.1625.

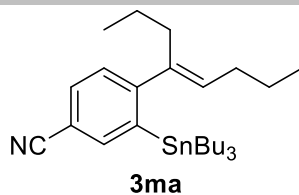

**Compound 3ma.** (Table 2, entry 16, 67% yield, colorless oil,  $R_f$  = 0.6 (hexanes)).  $^1\text{H NMR}$  (400 MHz,  $\text{CDCl}_3$ )  $\delta$  0.886 (t,  $J_{\text{H,H}}$  = 7.3 Hz, 9H), 0.892 (t,  $J_{\text{H,H}}$  = 7.3 Hz, 3H), 0.97 (t,  $J_{\text{H,H}}$  = 7.4 Hz, 3H), 1.01 (t,  $J_{\text{H,H}}$  = 8.3 Hz,  $J_{\text{H},^{119}\text{Sn}}$  = 51.2 Hz, 6H), 1.31 (sext,  $J_{\text{H,H}}$  = 7.3 Hz, 6H), 1.25–1.36 (m, 2H), 1.41–1.50 (m, 8H), 2.14 (q,  $J_{\text{H,H}}$  = 7.4 Hz, 2H), 2.31 (t,  $J_{\text{H,H}}$  = 8.0 Hz, 2H), 5.28 (t,  $J_{\text{H,H}}$  = 7.1 Hz, 1H), 7.20 (d,  $J_{\text{H,H}}$  = 7.9 Hz,  $J_{\text{H},^{119}\text{Sn}}$  = 14.4 Hz, 1H), 7.50 (dd,  $J_{\text{H,H}}$  = 7.9 Hz, 1.8 Hz, 1H), 7.66 (d,  $J_{\text{H,H}}$  = 1.7 Hz,  $J_{\text{H},^{119}\text{Sn}}$  = 39.2 Hz, 1H);  $^{13}\text{C NMR}$  (100 MHz,  $\text{CDCl}_3$ )  $\delta$  11.0 ( $J_{\text{C},^{119}\text{Sn}}$  = 345.3 Hz,  $J_{\text{C},^{117}\text{Sn}}$  = 329.8 Hz), 13.6, 14.1, 14.3, 21.6, 22.8, 27.3 ( $J_{\text{C},^{119}\text{Sn}}$  = 62.3 Hz), 29.0 ( $J_{\text{C},^{119}\text{Sn}}$  = 19.3 Hz), 30.5, 34.5, 109.6 ( $J_{\text{C},^{119}\text{Sn}}$  = 44.8 Hz), 119.8, 128.2 ( $J_{\text{C},^{119}\text{Sn}}$  = 30.9 Hz), 131.0, 131.1 ( $J_{\text{C},^{119}\text{Sn}}$  = 8.5 Hz), 140.3 ( $J_{\text{C},^{119}\text{Sn}}$  = 35.6 Hz), 142.9, 143.5 ( $J_{\text{C},^{119}\text{Sn}}$  = 12.2 Hz), 157.2 ( $J_{\text{C},^{119}\text{Sn}}$  = 24.8 Hz). **HRMS** (ESI) calcd for  $\text{C}_{27}\text{H}_{45}\text{NNa}^{120}\text{Sn}$   $[\text{M}+\text{Na}]^+$  526.2472, found 526.2480.

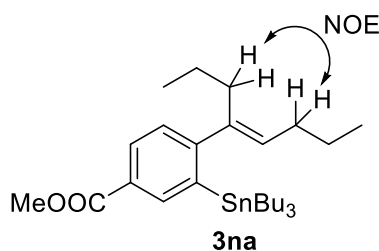

**Compound 3na.** (Table 2, entry 18, 82% yield, colorless oil,  $R_f$  = 0.5 (hexanes)). The *E* geometry was assigned by NOESY NMR study.  $^1\text{H NMR}$  (400 MHz,  $\text{CDCl}_3$ )  $\delta$  0.88 (t,  $J_{\text{H,H}}$  = 7.3 Hz, 9H), 0.89 (t,  $J_{\text{H,H}}$  = 7.3 Hz, 3H), 0.97 (t,  $J_{\text{H,H}}$  = 7.4 Hz, 3H), 1.02 (t,  $J_{\text{H,H}}$  = 8.3 Hz,  $J_{\text{H},^{119}\text{Sn}}$  = 49.9 Hz, 6H), 1.32 (sext,  $J_{\text{H,H}}$  = 7.3 Hz, 6H+2H), 1.42–1.53 (m, 8H), 2.14 (q,  $J_{\text{H,H}}$  = 7.4 Hz, 2H), 2.33 (t,  $J_{\text{H,H}}$  = 8.0 Hz, 2H), 3.90 (s, 3H), 5.30 (t,  $J_{\text{H,H}}$  = 7.0 Hz, 1H), 7.20 (d,  $J_{\text{H,H}}$  = 8.0 Hz,  $J_{\text{H},^{119}\text{Sn}}$  = 15.0 Hz, 1H), 7.87 (dd,  $J_{\text{H,H}}$  = 8.0 Hz, 1.8 Hz, 1H), 8.09 (d,  $J_{\text{H,H}}$  = 1.8 Hz,  $J_{\text{H},^{119}\text{Sn}}$  = 43.2 Hz, 1H);  $^{13}\text{C NMR}$  (75 MHz,  $\text{CDCl}_3$ )  $\delta$  10.9 ( $J_{\text{C},^{119}\text{Sn}}$  = 342.4 Hz,  $J_{\text{C},^{117}\text{Sn}}$  = 327.3 Hz), 13.6, 14.1, 14.3, 21.6, 22.9, 27.4 ( $J_{\text{C},^{119}\text{Sn}}$  = 62.3 Hz,  $J_{\text{C},^{117}\text{Sn}}$  = 59.6 Hz), 29.1 ( $J_{\text{C},^{119}\text{Sn}}$  = 19.1 Hz), 30.6, 34.6, 51.9, 127.1 ( $J_{\text{C},^{119}\text{Sn}}$  = 41.3 Hz), 127.8 ( $J_{\text{C},^{119}\text{Sn}}$  = 32.9 Hz), 128.8 ( $J_{\text{C},^{119}\text{Sn}}$  = 8.8 Hz), 130.3, 138.1 ( $J_{\text{C},^{119}\text{Sn}}$  = 35.4 Hz), 141.2, 143.9 ( $J_{\text{C},^{119}\text{Sn}}$  = 13.1 Hz), 157.5 ( $J_{\text{C},^{119}\text{Sn}}$  = 27.5 Hz), 167.6. **HRMS** (ESI) calcd for  $\text{C}_{28}\text{H}_{48}\text{O}_2\text{Na}^{120}\text{Sn}$   $[\text{M}+\text{Na}]^+$  559.2574, found 559.2605.

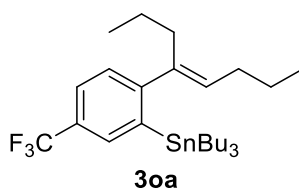

**Compound 3oa.** (Table 2, entry 19, 69% yield, colorless oil,  $R_f$  = 0.8 (hexanes)).  $^1\text{H NMR}$  (400

## Electronic Supplementary Information (ESI)

MHz, CDCl<sub>3</sub>)  $\delta$  0.89 (t,  $J_{\text{H,H}} = 7.3$  Hz, 9H), 0.90 (t,  $J_{\text{H,H}} = 7.2$  Hz, 3H), 0.97 (t,  $J_{\text{H,H}} = 7.3$  Hz, 3H), 1.02 (t,  $J_{\text{H,H}} = 8.3$  Hz,  $J_{\text{H},^{119}\text{Sn}} = 52.2$  Hz, 6H), 1.32 (sext,  $J_{\text{H,H}} = 7.3$  Hz, 6H), 1.27–1.37 (m, 2H), 1.42–1.52 (m, 8H), 2.15 (q,  $J_{\text{H,H}} = 7.4$  Hz, 2H), 2.32 (t,  $J_{\text{H,H}} = 8.0$  Hz, 2H), 5.29 (t,  $J_{\text{H,H}} = 7.1$  Hz, 1H), 7.23 (d,  $J_{\text{H,H}} = 7.9$  Hz,  $J_{\text{H},^{119}\text{Sn}} = 14.5$  Hz, 1H), 7.46 (dd,  $J_{\text{H,H}} = 8.0$  Hz, 1.5 Hz, 1H), 7.63 (s,  $J_{\text{H},^{119}\text{Sn}} = 42.4$  Hz, 1H); **<sup>13</sup>C NMR** (100 MHz, CDCl<sub>3</sub>)  $\delta$  10.9 ( $J_{\text{C},^{119}\text{Sn}} = 343.6$  Hz,  $J_{\text{C},^{117}\text{Sn}} = 328.7$  Hz), 13.6, 14.1, 14.4, 21.6, 22.9, 27.4 ( $J_{\text{C},^{119}\text{Sn}} = 62.0$  Hz), 29.1 ( $J_{\text{C},^{119}\text{Sn}} = 19.2$  Hz), 30.5, 34.7, 124.4 (q,  $J_{\text{C},^{19}\text{F}} = 3.8$  Hz), 124.7 (q,  $J_{\text{C},^{19}\text{F}} = 272.2$  Hz), 127.5 (q,  $J_{\text{C},^{19}\text{F}} = 31.6$  Hz), 127.9, 130.5, 133.2 (q,  $J_{\text{C},^{19}\text{F}} = 3.4$  Hz), 142.0, 143.6, 156.2. **HRMS** (ESI) calcd for C<sub>27</sub>H<sub>45</sub>F<sub>3</sub>Na<sup>120</sup>Sn [M+Na]<sup>+</sup> 569.2393, found 569.2371.

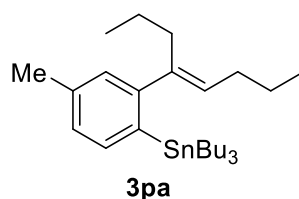

**Compound 3pa.** (Table 2, entry 20, 77% yield, colorless oil,  $R_f = 0.9$  (hexanes)). **<sup>1</sup>H NMR** (400 MHz, CDCl<sub>3</sub>)  $\delta$  0.88 (t,  $J_{\text{H,H}} = 7.3$  Hz, 9H+3H), 0.97 (t,  $J_{\text{H,H}} = 8.2$  Hz,  $J_{\text{H},^{119}\text{Sn}} = 50.2$  Hz, 6H), 0.97 (t,  $J_{\text{H,H}} = 8.2$  Hz, 3H), 1.32 (sext,  $J_{\text{H,H}} = 7.4$  Hz, 6H), 1.29–1.38 (m, 2H) 1.43–1.53 (m, 8H), 2.13 (q,  $J_{\text{H,H}} = 7.4$  Hz, 2H), 2.31 (t,  $J_{\text{H,H}} = 8.2$  Hz, 2H), 2.32 (s, 3H), 5.26 (t,  $J_{\text{H,H}} = 7.0$  Hz, 1H), 6.99 (s, 1H), 7.02 (d,  $J_{\text{H,H}} = 7.5$  Hz, 1H), 7.31 (d,  $J_{\text{H,H}} = 7.4$  Hz,  $J_{\text{H},^{119}\text{Sn}} = 42.9$  Hz, 1H); **<sup>13</sup>C NMR** (100 MHz, CDCl<sub>3</sub>)  $\delta$  10.8 ( $J_{\text{C},^{119}\text{Sn}} = 339.9$  Hz,  $J_{\text{C},^{117}\text{Sn}} = 324.5$  Hz), 13.6, 14.1, 14.4, 21.3, 21.7, 23.0, 27.5 ( $J_{\text{C},^{119}\text{Sn}} = 61.0$  Hz), 29.2 ( $J_{\text{C},^{119}\text{Sn}} = 18.6$  Hz), 30.6, 34.9, 126.6 ( $J_{\text{C},^{119}\text{Sn}} = 44.5$  Hz), 128.8 ( $J_{\text{C},^{119}\text{Sn}} = 36.6$  Hz), 129.4, 136.7, 136.9, 137.1, 144.4 ( $J_{\text{C},^{119}\text{Sn}} = 14.5$  Hz), 152.7 ( $J_{\text{C},^{119}\text{Sn}} = 29.1$  Hz). **HRMS** (ESI) calcd for C<sub>27</sub>H<sub>48</sub>Na<sup>120</sup>Sn [M+Na]<sup>+</sup> 515.2676, found 515.2698.

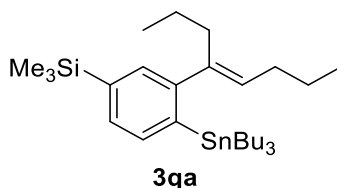

**Compound 3qa.** (Table 2, entry 21, 84% yield, colorless oil,  $R_f = 0.9$  (hexanes)). **<sup>1</sup>H NMR** (500 MHz, CDCl<sub>3</sub>)  $\delta$  0.27 (s, 9H), 0.90 (t,  $J_{\text{H,H}} = 7.3$  Hz, 9H), 0.92 (t,  $J_{\text{H,H}} = 7.4$  Hz, 3H), 0.987 (t,  $J_{\text{H,H}} = 7.2$  Hz, 3H), 0.993 (t,  $J_{\text{H,H}} = 8.4$  Hz,  $J_{\text{H},^{119}\text{Sn}} = 50.7$  Hz, 6H), 1.33 (sext,  $J_{\text{H,H}} = 7.3$  Hz, 6H), 1.33–1.41 (m, 2H), 1.44–1.52 (m, 8H), 2.15 (q,  $J_{\text{H,H}} = 7.4$  Hz, 2H), 2.33 (t,  $J_{\text{H,H}} = 8.0$  Hz, 2H), 5.28 (t,  $J_{\text{H,H}} = 7.0$  Hz, 1H), 7.28 (s,  $J_{\text{H},^{119}\text{Sn}} = 16.4$  Hz, 1H), 7.34 (d,  $J_{\text{H,H}} = 7.2$  Hz, 1H), 7.43 (d,  $J_{\text{H,H}} = 7.1$  Hz,  $J_{\text{H},^{119}\text{Sn}} = 43.0$  Hz, 1H); **<sup>13</sup>C NMR** (125 MHz, CDCl<sub>3</sub>)  $\delta$  -1.1, 10.8 ( $J_{\text{C},^{119}\text{Sn}} = 339.0$  Hz,  $J_{\text{C},^{117}\text{Sn}} = 323.9$  Hz), 13.6, 14.2, 14.4, 21.6, 23.0, 27.5 ( $J_{\text{C},^{119}\text{Sn}} = 60.4$  Hz), 29.2 ( $J_{\text{C},^{119}\text{Sn}} = 18.5$  Hz), 30.6, 35.0, 129.5, 130.5, 132.6, 136.3, 139.1, 141.6, 144.5, 151.8. **HRMS** (ESI) calcd for C<sub>29</sub>H<sub>54</sub>NaSi<sup>120</sup>Sn [M+Na]<sup>+</sup> 573.2914, found 573.2917.

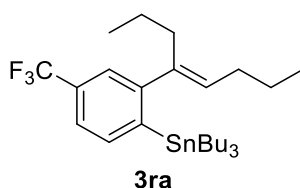

**Compound 3ra.** (Table 2, entry 22, 67% yield, colorless oil,  $R_f$  = 0.9 (hexanes)).  $^1\text{H NMR}$  (400 MHz,  $\text{CDCl}_3$ )  $\delta$  0.89 (t,  $J_{\text{H,H}}$  = 7.3 Hz, 9H), 0.91 (t,  $J_{\text{H,H}}$  = 7.4 Hz, 3H), 0.98 (t,  $J_{\text{H,H}}$  = 7.4 Hz, 3H), 1.02 (t,  $J_{\text{H,H}}$  = 8.2 Hz,  $J_{\text{H},^{119}\text{Sn}}$  = 50.0 Hz, 6H), 1.32 (sext,  $J_{\text{H,H}}$  = 7.3 Hz, 6H), 1.26–1.42 (m, 2H), 1.42–1.51 (m, 8H), 2.15 (q,  $J_{\text{H,H}}$  = 7.4 Hz, 2H), 2.32 (t,  $J_{\text{H,H}}$  = 8.0 Hz, 2H), 5.29 (t,  $J_{\text{H,H}}$  = 7.0 Hz, 1H), 7.34 (s, 1H), 7.40 (d,  $J_{\text{H,H}}$  = 7.6 Hz, 1H), 7.53 (d,  $J_{\text{H,H}}$  = 7.6 Hz,  $J_{\text{H},^{119}\text{Sn}}$  = 40.0 Hz, 1H);  $^{13}\text{C NMR}$  (125 MHz,  $\text{CDCl}_3$ )  $\delta$  10.9 ( $J_{\text{C},^{119}\text{Sn}}$  = 343.1 Hz,  $J_{\text{C},^{117}\text{Sn}}$  = 328.1 Hz), 13.6, 14.1, 14.4, 21.6, 22.9, 27.4 ( $J_{\text{C},^{119}\text{Sn}}$  = 61.7 Hz), 29.1 ( $J_{\text{C},^{119}\text{Sn}}$  = 19.2 Hz), 30.6, 34.8, 121.8 (q,  $J_{\text{C},^{19}\text{F}}$  = 3.7 Hz,  $J_{\text{C},^{119}\text{Sn}}$  = 41.0 Hz), 124.1 (q,  $J_{\text{C},^{19}\text{F}}$  = 3.6 Hz,  $J_{\text{C},^{119}\text{Sn}}$  = 34.0 Hz), 124.4 (q,  $J_{\text{C},^{19}\text{F}}$  = 272.2 Hz), 129.6 (q,  $J_{\text{C},^{19}\text{F}}$  = 31.8 Hz), 130.6, 137.1 ( $J_{\text{C},^{119}\text{Sn}}$  = 33.0 Hz), 143.4 ( $J_{\text{C},^{119}\text{Sn}}$  = 13.0 Hz), 146.3, 153.2 ( $J_{\text{C},^{119}\text{Sn}}$  = 28.2 Hz). **HRMS** (ESI) calcd for  $\text{C}_{27}\text{H}_{45}\text{F}_3\text{Na}^{120}\text{Sn}$   $[\text{M}+\text{Na}]^+$  569.2393, found 569.2393.

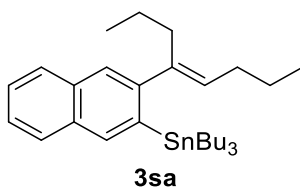

**Compound 3sa.** (Table 2, entry 23, 83% yield, colorless oil,  $R_f$  = 0.9 (hexanes)).  $^1\text{H NMR}$  (400 MHz,  $\text{CDCl}_3$ )  $\delta$  0.89 (t,  $J_{\text{H,H}}$  = 7.3 Hz, 9H+3H), 1.00 (t,  $J_{\text{H,H}}$  = 7.4 Hz, 3H), 1.06 (t,  $J_{\text{H,H}}$  = 8.3 Hz,  $J_{\text{H},^{119}\text{Sn}}$  = 50.8 Hz, 6H), 1.34 (sext,  $J_{\text{H,H}}$  = 7.3 Hz, 6H), 1.25–1.41 (m, 2H), 1.47–1.54 (m, 8H), 2.19 (q,  $J_{\text{H,H}}$  = 7.4 Hz, 2H), 2.39 (t,  $J_{\text{H,H}}$  = 7.9 Hz, 2H), 5.38 (t,  $J_{\text{H,H}}$  = 7.0 Hz, 1H), 7.40–7.45 (m, 2H), 7.56 (s,  $J_{\text{H},^{119}\text{Sn}}$  = 14.3 Hz, 1H), 7.73–7.80 (m, 2H), 7.89 (s,  $J_{\text{H},^{119}\text{Sn}}$  = 48.3 Hz, 1H);  $^{13}\text{C NMR}$  (100 MHz,  $\text{CDCl}_3$ )  $\delta$  11.0 ( $J_{\text{C},^{119}\text{Sn}}$  = 340.0 Hz,  $J_{\text{C},^{117}\text{Sn}}$  = 325.2 Hz), 13.7, 14.2, 14.3, 21.6, 23.0, 27.5 ( $J_{\text{C},^{119}\text{Sn}}$  = 62.1 Hz), 29.2 ( $J_{\text{C},^{119}\text{Sn}}$  = 19.0 Hz), 30.6, 34.8, 125.2, 125.7, 125.9, 127.3, 127.5, 129.9, 131.7, 133.0, 137.1 ( $J_{\text{C},^{119}\text{Sn}}$  = 30.6 Hz), 140.0, 144.1 ( $J_{\text{C},^{119}\text{Sn}}$  = 11.6 Hz), 149.3. **HRMS** (ESI) calcd for  $\text{C}_{30}\text{H}_{48}\text{Na}^{120}\text{Sn}$   $[\text{M}+\text{Na}]^+$  551.2676, found 551.2660.

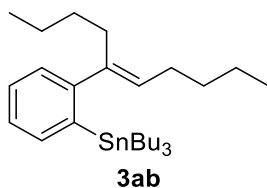

**Compound 3ab.** (Table 3, 84% yield, colorless oil,  $R_f$  = 0.9 (hexanes)).  $^1\text{H NMR}$  (400 MHz,  $\text{CDCl}_3$ )  $\delta$  0.88 (t,  $J_{\text{H,H}}$  = 7.0 Hz, 3H), 0.89 (t,  $J_{\text{H,H}}$  = 7.3 Hz, 9H), 0.94 (t,  $J_{\text{H,H}}$  = 7.1 Hz, 3H), 0.99 (t,  $J_{\text{H,H}}$  = 8.3 Hz,  $J_{\text{H},^{119}\text{Sn}}$  = 50.6 Hz, 6H), 1.28–1.52 (m, 20H), 2.16 (q,  $J_{\text{H,H}}$  = 7.1 Hz, 2H), 2.34 (t,  $J_{\text{H,H}}$  = 7.5 Hz,

## Electronic Supplementary Information (ESI)

2H), 5.25 (t,  $J_{\text{H,H}} = 7.0$  Hz, 1H), 7.16 (d,  $J_{\text{H,H}} = 7.4$  Hz, 1.3 Hz, 1H), 7.19 (td,  $J_{\text{H,H}} = 7.1$  Hz, 1.6 Hz, 1H), 7.24 (td,  $J_{\text{H,H}} = 7.3$  Hz, 1.7 Hz, 1H), 7.42 (dd,  $J_{\text{H,H}} = 7.0$  Hz, 1.3 Hz,  $J_{\text{H},^{119}\text{Sn}} = 43.0$  Hz, 1H);  $^{13}\text{C}$  NMR (100 MHz,  $\text{CDCl}_3$ )  $\delta$  10.9 ( $J_{\text{C},^{119}\text{Sn}} = 339.7$  Hz,  $J_{\text{C},^{117}\text{Sn}} = 324.5$  Hz), 13.6, 13.9, 14.0, 22.6, 23.1, 27.5 ( $J_{\text{C},^{119}\text{Sn}} = 61.0$  Hz), 28.1, 29.2 ( $J_{\text{C},^{119}\text{Sn}} = 18.9$  Hz), 30.6, 32.0, 32.5, 125.6 ( $J_{\text{C},^{119}\text{Sn}} = 42.6$  Hz), 127.5 ( $J_{\text{C},^{119}\text{Sn}} = 9.5$  Hz), 127.9 ( $J_{\text{C},^{119}\text{Sn}} = 34.8$  Hz), 129.6, 136.9 ( $J_{\text{C},^{119}\text{Sn}} = 30.5$  Hz), 140.7 ( $J_{\text{C},^{119}\text{Sn}} = 413.7$  Hz,  $J_{\text{C},^{117}\text{Sn}} = 395.4$  Hz), 144.4 ( $J_{\text{C},^{119}\text{Sn}} = 14.4$  Hz), 152.7 ( $J_{\text{C},^{119}\text{Sn}} = 28.3$  Hz). **HRMS** (ESI) calcd for  $\text{C}_{28}\text{H}_{50}\text{Na}^{120}\text{Sn} [\text{M}+\text{Na}]^+$  529.2832, found 529.2819.

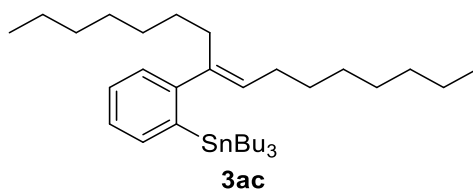

**Compound 3ac.** (Table 3, 83% yield, colorless oil,  $R_f = 0.8$  (hexanes)).  $^1\text{H}$  NMR (400 MHz,  $\text{CDCl}_3$ )  $\delta$  0.89 (t,  $J_{\text{H,H}} = 7.2$  Hz, 9H), 0.85–0.92 (m, 6H), 0.99 (t,  $J_{\text{H,H}} = 8.3$  Hz,  $J_{\text{H},^{119}\text{Sn}} = 50.8$  Hz, 6H), 1.18–1.40 (m, 24H), 1.42–1.54 (m, 8H), 2.15 (q,  $J_{\text{H,H}} = 7.2$  Hz, 2H), 2.33 (t,  $J_{\text{H,H}} = 7.5$  Hz, 2H), 5.25 (t,  $J_{\text{H,H}} = 7.0$  Hz, 1H), 7.16 (d,  $J_{\text{H,H}} = 7.4$  Hz, 1H), 7.19 (td,  $J_{\text{H,H}} = 7.1$  Hz, 1.5 Hz, 1H), 7.24 (td,  $J_{\text{H,H}} = 7.3$  Hz, 1.6 Hz, 1H), 7.42 (dd,  $J_{\text{H,H}} = 7.0$  Hz, 1.5 Hz,  $J_{\text{H},^{119}\text{Sn}} = 42.8$  Hz, 1H);  $^{13}\text{C}$  NMR (100 MHz,  $\text{CDCl}_3$ )  $\delta$  10.9 ( $J_{\text{C},^{119}\text{Sn}} = 339.6$  Hz,  $J_{\text{C},^{117}\text{Sn}} = 324.6$  Hz), 13.7, 14.06, 14.09, 22.6, 22.7, 27.5 ( $J_{\text{C},^{119}\text{Sn}} = 62.1$  Hz), 28.5, 29.16, 29.17, 29.3, 29.6, 29.8, 30.0, 31.9, 32.8, 125.6 ( $J_{\text{C},^{119}\text{Sn}} = 42.3$  Hz), 127.4 ( $J_{\text{C},^{119}\text{Sn}} = 9.4$  Hz), 127.9 ( $J_{\text{C},^{119}\text{Sn}} = 34.9$  Hz), 129.6, 136.9 ( $J_{\text{C},^{119}\text{Sn}} = 32.4$  Hz), 140.7 ( $J_{\text{C},^{119}\text{Sn}} = 414.0$  Hz,  $J_{\text{C},^{117}\text{Sn}} = 395.7$  Hz), 144.4 ( $J_{\text{C},^{119}\text{Sn}} = 14.5$  Hz), 152.7 ( $J_{\text{C},^{119}\text{Sn}} = 28.1$  Hz). **HRMS** (ESI) calcd for  $\text{C}_{34}\text{H}_{62}\text{Na}^{120}\text{Sn} [\text{M}+\text{Na}]^+$  613.3771, found 613.3762.

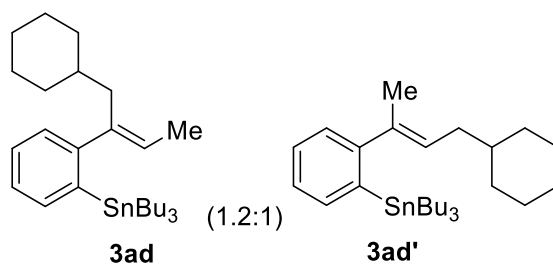

**Compound 3ad:3ad' (1.2:1).** (Table 3, 84% yield, colorless oil,  $R_f = 0.9$  (hexanes)).  $^1\text{H}$  NMR (400 MHz,  $\text{CDCl}_3$ ) for **3ad**  $\delta$  0.88 (t,  $J_{\text{H,H}} = 7.3$  Hz, 9H), 0.83–0.91 (m, 2H), 0.98 (t,  $J_{\text{H,H}} = 8.3$  Hz, 6H), 1.32 (sext,  $J_{\text{H,H}} = 7.3$  Hz, 6H), 1.10–1.41 (m, 4H), 1.43–1.60 (m, 6H), 1.73 (d,  $J_{\text{H,H}} = 6.8$  Hz, 3H), 1.60–1.83 (m, 5H), 2.22 (d,  $J_{\text{H,H}} = 7.1$  Hz, 2H), 5.39 (q,  $J_{\text{H,H}} = 6.8$  Hz, 1H), 7.10 (dd,  $J_{\text{H,H}} = 7.4$  Hz, 1.3 Hz, 1H), 7.16–7.29 (m, 2H), 7.41 (dd,  $J_{\text{H,H}} = 6.9$  Hz, 1.6 Hz, 1H); **3ad'**  $\delta$  0.89 (t,  $J_{\text{H,H}} = 7.3$  Hz, 9H), 0.83–0.91 (m, 2H), 0.97 (t,  $J_{\text{H,H}} = 8.3$  Hz, 6H), 1.32 (sext,  $J_{\text{H,H}} = 7.3$  Hz, 6H), 1.10–1.40 (m, 4H), 1.43–1.60 (m, 6H), 1.60–1.83 (m, 5H), 1.96 (s, 3H), 2.03 (t,  $J_{\text{H,H}} = 7.0$  Hz, 2H), 5.31 (td,  $J_{\text{H,H}} = 7.3$  Hz, 1.4 Hz, 1H), 7.16–7.29 (m, 3H), 7.43 (dd,  $J_{\text{H,H}} = 7.0$  Hz, 1.4 Hz, 1H);  $^{13}\text{C}$  NMR (100 MHz,  $\text{CDCl}_3$ ) for **3ad**  $\delta$

## Electronic Supplementary Information (ESI)

10.7 ( $J_{\text{C},^{119}\text{Sn}} = 339.4$  Hz,  $J_{\text{C},^{117}\text{Sn}} = 323.9$  Hz), 13.6, 14.1, 26.3, 26.6, 27.5 ( $J_{\text{C},^{119}\text{Sn}} = 60.7$  Hz), 29.2 ( $J_{\text{C},^{119}\text{Sn}} = 19.0$  Hz), 33.6, 36.4, 38.4, 125.5, 127.0, 127.5 ( $J_{\text{C},^{119}\text{Sn}} = 10.0$  Hz), 128.2, 136.8, 140.5, 143.7, 153.2; **3ad'**  $\delta$  10.8 ( $J_{\text{C},^{119}\text{Sn}} = 340.9$  Hz,  $J_{\text{C},^{117}\text{Sn}} = 326.5$  Hz), 13.6, 18.9, 26.4, 26.6, 27.5 ( $J_{\text{C},^{119}\text{Sn}} = 60.7$  Hz), 29.2 ( $J_{\text{C},^{119}\text{Sn}} = 19.0$  Hz), 33.4, 36.6, 40.1, 124.6, 125.8, 127.6 ( $J_{\text{C},^{119}\text{Sn}} = 10.0$  Hz), 128.3, 137.0, 140.4, 140.7, 154.0. **HRMS** (ESI) calcd for  $\text{C}_{28}\text{H}_{48}\text{Na}^{120}\text{Sn}$   $[\text{M}+\text{Na}]^+$  527.2676, found 527.2703.

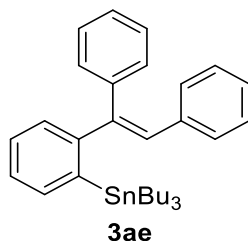

**Compound 3ae.** (Table 3, 72% yield, colorless oil,  $R_f = 0.8$  (hexanes)).  **$^1\text{H}$  NMR** (400 MHz,  $\text{CDCl}_3$ )  $\delta$  0.83 (t,  $J_{\text{H,H}} = 7.3$  Hz, 9H), 0.98 (t,  $J_{\text{H,H}} = 8.3$  Hz,  $J_{\text{H},^{119}\text{Sn}} = 50.6$  Hz, 6H), 1.27 (sext,  $J_{\text{H,H}} = 7.3$  Hz, 6H), 1.4–1.5 (m, 6H), 6.58 (s, 1H), 7.01 (dd,  $J_{\text{H,H}} = 7.6$  Hz, 1.0 Hz, 1H), 7.05–7.30 (m, 12H), 7.54 (dd,  $J_{\text{H,H}} = 7.2$  Hz, 1.1 Hz,  $J_{\text{H},^{119}\text{Sn}} = 41.6$  Hz, 1H);  **$^{13}\text{C}$  NMR** (100 MHz,  $\text{CDCl}_3$ )  $\delta$  11.0 ( $J_{\text{C},^{119}\text{Sn}} = 342.2$  Hz,  $J_{\text{C},^{117}\text{Sn}} = 327.0$  Hz), 13.6, 27.4 ( $J_{\text{C},^{119}\text{Sn}} = 61.6$  Hz), 29.2 ( $J_{\text{C},^{119}\text{Sn}} = 18.9$  Hz), 126.7, 126.8, 127.5, 127.6 ( $J_{\text{C},^{119}\text{Sn}} = 9.3$  Hz), 128.0, 128.2, 129.4, 129.5, 129.6, 130.6, 137.2, 137.4, 140.8, 142.0, 146.3 ( $J_{\text{C},^{119}\text{Sn}} = 14.3$  Hz), 152.4 ( $J_{\text{C},^{119}\text{Sn}} = 25.1$  Hz). **HRMS** (ESI) calcd for  $\text{C}_{32}\text{H}_{42}\text{Na}^{120}\text{Sn}$   $[\text{M}+\text{Na}]^+$  569.2206, found 569.2222.

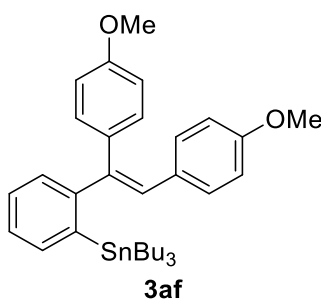

**Compound 3af.** (Table 3, 78% yield, colorless oil,  $R_f = 0.3$  (hexanes)).  **$^1\text{H}$  NMR** (400 MHz,  $\text{CDCl}_3$ )  $\delta$  0.83 (t,  $J_{\text{H,H}} = 7.3$  Hz, 9H), 0.96 (t,  $J_{\text{H,H}} = 7.3$  Hz,  $J_{\text{H},^{119}\text{Sn}} = 50.6$  Hz, 6H), 1.26 (sext,  $J_{\text{H,H}} = 7.3$  Hz, 6H), 1.40–1.48 (m, 6H), 3.78 (s, 3H), 3.81 (s, 3H), 6.43 (s, 1H), 6.72 (d,  $J_{\text{H,H}} = 8.8$  Hz, 2H), 6.78 (d,  $J_{\text{H,H}} = 8.8$  Hz, 2H), 7.00 (dd,  $J_{\text{H,H}} = 7.6$  Hz, 1.1 Hz, 1H), 7.06 (d,  $J_{\text{H,H}} = 8.6$  Hz, 2H), 7.11 (d,  $J_{\text{H,H}} = 8.8$  Hz, 2H), 7.19 (td,  $J_{\text{H,H}} = 7.4$  Hz, 1.5 Hz, 1H), 7.24 (td,  $J_{\text{H,H}} = 7.2$  Hz, 1.4 Hz, 1H), 7.52 (dd,  $J_{\text{H,H}} = 7.2$  Hz, 1.1 Hz,  $J_{\text{H},^{119}\text{Sn}} = 41.7$  Hz, 1H);  **$^{13}\text{C}$  NMR** (100 MHz,  $\text{CDCl}_3$ )  $\delta$  11.0 ( $J_{\text{C},^{119}\text{Sn}} = 341.9$  Hz,  $J_{\text{C},^{117}\text{Sn}} = 326.7$  Hz), 13.6, 27.5 ( $J_{\text{C},^{119}\text{Sn}} = 61.7$  Hz), 29.2 ( $J_{\text{C},^{119}\text{Sn}} = 18.9$  Hz), 55.1, 55.2, 113.4, 113.6, 126.5, 127.5 ( $J_{\text{C},^{119}\text{Sn}} = 9.4$  Hz), 128.3, 129.5, 130.2, 130.6, 131.8, 133.3, 137.3 ( $J_{\text{C},^{119}\text{Sn}} = 32.1$  Hz), 142.0, 144.1 ( $J_{\text{C},^{119}\text{Sn}} = 14.6$  Hz), 152.8, 158.3, 158.9. **HRMS** (ESI) calcd for  $\text{C}_{34}\text{H}_{46}\text{O}_2\text{Na}^{120}\text{Sn}$   $[\text{M}+\text{Na}]^+$  629.2417, found 629.2411.



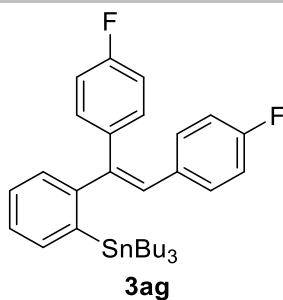

**Compound 3ag.** (Table 3, 74% yield, colorless solid,  $R_f$  = 0.7 (hexanes)).  $^1\text{H NMR}$  (400 MHz,  $\text{CDCl}_3$ )  $\delta$  0.83 (t,  $J_{\text{H,H}}$  = 7.3 Hz, 9H), 0.96 (t,  $J_{\text{H,H}}$  = 8.3 Hz,  $J_{\text{H},^{119}\text{Sn}}$  = 52.1 Hz, 6H), 1.26 (sext,  $J_{\text{H,H}}$  = 7.3 Hz, 6H), 1.40–1.48 (m, 6H), 6.51 (s, 1H), 6.88 (t,  $J_{\text{H,H}}$  =  $J_{\text{H},^{19}\text{F}}$  = 8.7 Hz, 2H), 6.94 (t,  $J_{\text{H,H}}$  =  $J_{\text{H},^{19}\text{F}}$  = 8.7 Hz, 2H), 6.97 (dd,  $J_{\text{H,H}}$  = 7.1 Hz, 1.0 Hz, 1H), 7.06 (dd,  $J_{\text{H,H}}$  = 8.6 Hz,  $J_{\text{H},^{19}\text{F}}$  = 5.5 Hz, 2H), 7.13 (dd,  $J_{\text{H,H}}$  = 8.7 Hz,  $J_{\text{H},^{19}\text{F}}$  = 5.5 Hz, 2H), 7.20 (td,  $J_{\text{H,H}}$  = 7.5 Hz, 1.5 Hz, 1H), 7.27 (td,  $J_{\text{H,H}}$  = 7.3 Hz, 1.4 Hz, 1H), 7.54 (dd,  $J_{\text{H,H}}$  = 7.2 Hz, 1.2 Hz,  $J_{\text{H},^{119}\text{Sn}}$  = 41.5 Hz, 1H);  $^{13}\text{C NMR}$  (100 MHz,  $\text{CDCl}_3$ )  $\delta$  11.1 ( $J_{\text{C},^{119}\text{Sn}}$  = 343.4 Hz,  $J_{\text{C},^{117}\text{Sn}}$  = 326.9 Hz), 13.6, 27.4 ( $J_{\text{C},^{119}\text{Sn}}$  = 61.8 Hz), 29.1 ( $J_{\text{C},^{119}\text{Sn}}$  = 18.9 Hz), 115.2 (d,  $J_{\text{C},^{19}\text{F}}$  = 21.3 Hz), 115.4 (d,  $J_{\text{C},^{19}\text{F}}$  = 21.4 Hz), 126.9, 127.7, 128.4, 129.5, 130.9 (d,  $J_{\text{C},^{19}\text{F}}$  = 7.9 Hz), 132.3 (d,  $J_{\text{C},^{19}\text{F}}$  = 7.9 Hz), 133.2 (d,  $J_{\text{C},^{19}\text{F}}$  = 3.2 Hz), 136.4 (d,  $J_{\text{C},^{19}\text{F}}$  = 2.6 Hz), 137.5, 142.0, 145.1, 151.9, 161.6 (d,  $J_{\text{C},^{19}\text{F}}$  = 247.4 Hz), 162.3 (d,  $J_{\text{C},^{19}\text{F}}$  = 247.7 Hz). **HRMS** (ESI) calcd for  $\text{C}_{32}\text{H}_{40}\text{F}_2\text{Na}^{120}\text{Sn} [\text{M}+\text{Na}]^+$  605.2018, found 605.2023. The structure of compound **3ag** was confirmed by single crystal X-ray diffraction (Section 9).

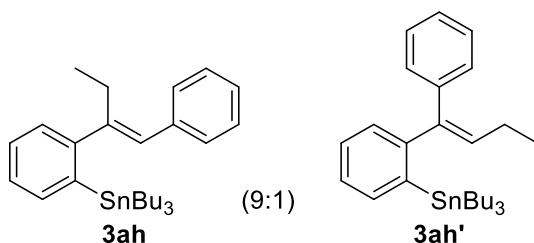

**Compound 3ah:3ah' (9:1).** (Table 3, 73% yield, colorless oil,  $R_f$  = 0.8 (hexanes)).  $^1\text{H NMR}$  (400 MHz,  $\text{CDCl}_3$ ) for **3ah**  $\delta$  0.83 (t,  $J_{\text{H,H}}$  = 7.3 Hz, 9H), 1.00 (t,  $J_{\text{H,H}}$  = 8.4 Hz, 6H), 1.04 (t,  $J_{\text{H,H}}$  = 7.8 Hz, 3H), 1.26 (sext,  $J_{\text{H,H}}$  = 7.3 Hz, 6H), 1.40–1.50 (m, 6H), 2.68 (q,  $J_{\text{H,H}}$  = 7.5 Hz, 2H), 6.33 (s, 1H), 7.15–7.38 (m, 8H), 7.49 (d,  $J_{\text{H,H}}$  = 7.0 Hz,  $J_{\text{H},^{119}\text{Sn}}$  = 42.7 Hz, 1H), (**3ah'**  $\delta$  1.12 (t,  $J_{\text{H,H}}$  = 7.5 Hz, 3H), 2.31 (quint,  $J_{\text{H,H}}$  = 7.5 Hz, 2H), 5.63 (t,  $J_{\text{H,H}}$  = 7.5 Hz, 1H));  $^{13}\text{C NMR}$  (100 MHz,  $\text{CDCl}_3$ ) for **3ah**  $\delta$  11.0 ( $J_{\text{C},^{119}\text{Sn}}$  = 338.4 Hz,  $J_{\text{C},^{117}\text{Sn}}$  = 323.7 Hz), 12.9, 13.6, 25.9, 27.4 ( $J_{\text{C},^{119}\text{Sn}}$  = 61.2 Hz), 29.1 ( $J_{\text{C},^{119}\text{Sn}}$  = 18.8 Hz), 126.2, 126.5, 127.4, 127.6, 128.2, 128.7, 129.9, 137.3, 137.8, 141.1, 148.4, 151.7. **HRMS** (ESI) calcd for  $\text{C}_{26}\text{H}_{46}\text{Na}^{120}\text{Sn} [\text{M}+\text{Na}]^+$  521.2206, found 521.2206.

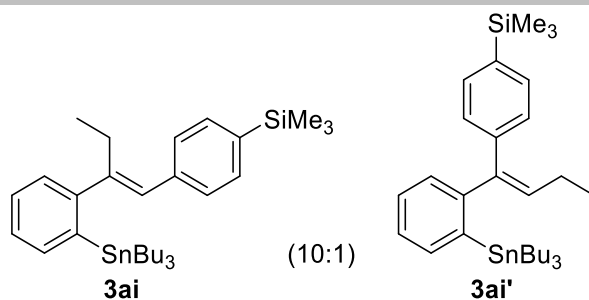

**Compound 3ai:3ai' (10:1).** (Table 3, 77% yield, colorless oil,  $R_f$  = 0.8 (hexanes)).  $^1\text{H}$  NMR (400 MHz,  $\text{CDCl}_3$ ) for **3ai**  $\delta$  0.29 (s, 9H), 0.83 (t,  $J_{\text{H,H}}$  = 7.3 Hz, 9H), 1.01 (t,  $J_{\text{H,H}}$  = 8.4 Hz,  $J_{\text{H},^{119}\text{Sn}}$  = 50.3 Hz, 6H), 1.05 (t,  $J_{\text{H,H}}$  = 7.5 Hz, 3H), 1.28 (sext,  $J_{\text{H,H}}$  = 7.3 Hz, 6H), 1.41–1.50 (m, 6H), 2.70 (q,  $J_{\text{H,H}}$  = 7.5 Hz, 2H), 6.33 (s, 1H), 7.23–7.30 (m, 3H), 7.32 (d,  $J_{\text{H,H}}$  = 7.8 Hz, 2H), 7.50 (d,  $J_{\text{H,H}}$  = 7.0 Hz,  $J_{\text{H},^{119}\text{Sn}}$  = 41.6 Hz, 1H), 7.53 (d,  $J_{\text{H,H}}$  = 8.0 Hz, 2H), (**3ai'**  $\delta$  0.26 (s, 9H), 1.13 (t,  $J_{\text{H,H}}$  = 7.5 Hz, 3H), 2.34 (quint,  $J_{\text{H,H}}$  = 7.5 Hz, 2H), 5.63 (t,  $J_{\text{H,H}}$  = 7.5 Hz, 1H));  $^{13}\text{C}$  NMR (100 MHz,  $\text{CDCl}_3$ ) for **3ai**  $\delta$  –1.1, 11.1 ( $J_{\text{C},^{119}\text{Sn}}$  = 339.9 Hz,  $J_{\text{C},^{117}\text{Sn}}$  = 325.0 Hz), 12.9, 13.6, 26.0, 27.4 ( $J_{\text{C},^{119}\text{Sn}}$  = 61.9 Hz), 29.1 ( $J_{\text{C},^{119}\text{Sn}}$  = 19.0 Hz), 126.2 ( $J_{\text{C},^{119}\text{Sn}}$  = 40.5 Hz), 127.4, 127.6 ( $J_{\text{C},^{119}\text{Sn}}$  = 9.5 Hz), 128.0, 128.7, 133.3, 137.3 ( $J_{\text{C},^{119}\text{Sn}}$  = 31.6 Hz), 138.2, 138.5, 141.1, 148.6 ( $J_{\text{C},^{119}\text{Sn}}$  = 13.9 Hz), 151.7. **HRMS** (ESI) calcd for  $\text{C}_{31}\text{H}_{50}\text{NaSi}^{120}\text{Sn} [\text{M}+\text{Na}]^+$  593.2601, found 593.2617.

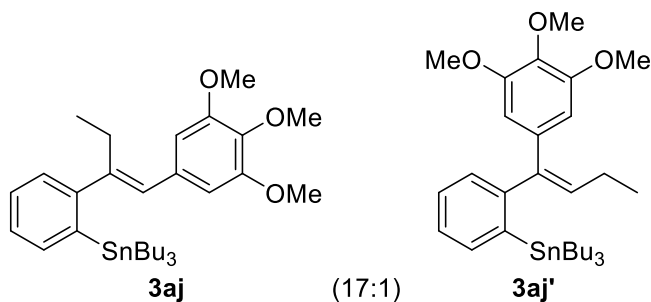

**Compound 3aj:3aj' (17:1).** (Table 3, 76% yield, colorless oil,  $R_f$  = 0.3 (hexanes)).  $^1\text{H}$  NMR (400 MHz,  $\text{CDCl}_3$ ) for **3aj**  $\delta$  0.84 (t,  $J_{\text{H,H}}$  = 7.3 Hz, 9H), 1.02 (t,  $J_{\text{H,H}}$  = 8.4 Hz, 6H), 1.07 (t,  $J_{\text{H,H}}$  = 7.5 Hz, 3H), 1.29 (sext,  $J_{\text{H,H}}$  = 7.3 Hz, 6H), 1.43–1.51 (m, 6H), 2.71 (q,  $J_{\text{H,H}}$  = 7.6 Hz, 2H), 3.87 (s, 6H), 3.88 (s, 3H), 6.27 (s, 1H), 6.57 (s, 2H), 7.20–7.37 (m, 3H), 7.49 (d,  $J_{\text{H,H}}$  = 7.0 Hz,  $J_{\text{H},^{119}\text{Sn}}$  = 42.5 Hz, 1H), (**3aj'**  $\delta$  1.34 (t,  $J_{\text{H,H}}$  = 7.5 Hz, 3H), 2.33 (quint,  $J_{\text{H,H}}$  = 7.5 Hz, 2H), 5.60 (t,  $J_{\text{H,H}}$  = 7.5 Hz, 1H));  $^{13}\text{C}$  NMR (100 MHz,  $\text{CDCl}_3$ ) for **3aj**  $\delta$  11.1 ( $J_{\text{C},^{119}\text{Sn}}$  = 340.4 Hz,  $J_{\text{C},^{117}\text{Sn}}$  = 325.2 Hz), 12.9, 13.6, 26.1, 27.5, 29.1 ( $J_{\text{C},^{119}\text{Sn}}$  = 18.7 Hz), 56.0, 60.9, 105.9, 126.3, 127.4, 127.6, 128.7, 133.5, 136.9, 137.3, 141.1, 148.1, 151.6, 153.0. **HRMS** (ESI) calcd for  $\text{C}_{31}\text{H}_{48}\text{O}_3\text{Na}^{120}\text{Sn} [\text{M}+\text{Na}]^+$  611.2523, found 611.2550.

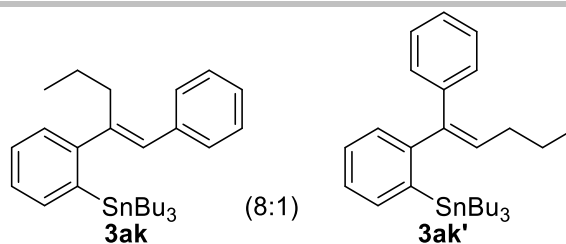

**Compound 3ak:3ak' (8:1).** (Table 3, 71% yield, colorless oil,  $R_f$  = 0.8 (hexanes)).  $^1\text{H NMR}$  (400 MHz,  $\text{CDCl}_3$ ) for **3ak**  $\delta$  0.84 (t,  $J_{\text{H,H}}$  = 7.3 Hz, 9H), 0.91 (t,  $J_{\text{H,H}}$  = 7.4 Hz, 3H), 1.01 (t,  $J_{\text{H,H}}$  = 8.4 Hz,  $J_{\text{H},^{119}\text{Sn}}$  = 51.4 Hz, 6H), 1.28 (sext,  $J_{\text{H,H}}$  = 7.3 Hz, 6H), 1.41–1.50 (m, 8H), 2.61 (deformed t,  $J_{\text{H,H}}$  = 8.2 Hz, 2H), 6.35 (s, 1H), 7.18–7.39 (m, 8H), 7.49 (d,  $J_{\text{H,H}}$  = 7.0 Hz,  $J_{\text{H},^{119}\text{Sn}}$  = 41.8 Hz, 1H), (**3ak'**  $\delta$  2.28 (q,  $J_{\text{H,H}}$  = 7.5 Hz, 2H), 5.68 (t,  $J_{\text{H,H}}$  = 7.4 Hz, 1H));  $^{13}\text{C NMR}$  (100 MHz,  $\text{CDCl}_3$ ) for **3ak**  $\delta$  11.0 ( $J_{\text{C},^{119}\text{Sn}}$  = 340.1 Hz,  $J_{\text{C},^{117}\text{Sn}}$  = 325.1 Hz), 13.6, 14.5, 21.7, 27.4 ( $J_{\text{C},^{119}\text{Sn}}$  = 62.1 Hz), 29.1 ( $J_{\text{C},^{119}\text{Sn}}$  = 19.1 Hz), 35.3, 126.1, 126.5, 127.5, 127.6, 128.2, 128.7, 129.0, 137.2, 137.9, 140.8, 147.3, 152.2. **HRMS** (ESI) calcd for  $\text{C}_{29}\text{H}_{44}\text{Na}^{120}\text{Sn} [\text{M}+\text{Na}]^+$  535.2363, found 535.2394.

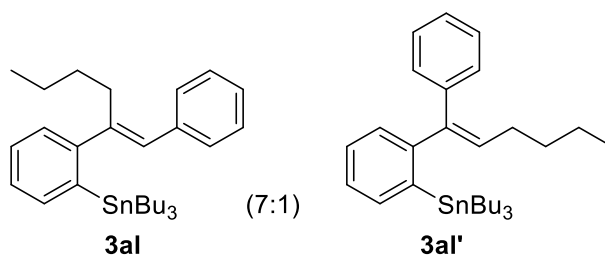

**Compound 3al:3al' (7:1).** (Table 3, 73% yield, colorless oil,  $R_f$  = 0.9 (hexanes)).  $^1\text{H NMR}$  (400 MHz,  $\text{CDCl}_3$ ) for **3al**  $\delta$  0.84 (t,  $J_{\text{H,H}}$  = 7.3 Hz, 9H), 0.87 (t,  $J_{\text{H,H}}$  = 7.2 Hz, 3H), 1.01 (t,  $J_{\text{H,H}}$  = 8.4 Hz,  $J_{\text{H},^{119}\text{Sn}}$  = 51.2 Hz, 6H), 1.24 (t,  $J_{\text{H,H}}$  = 7.3 Hz, 6H), 1.27–1.35 (m, 2H), 1.39–1.51 (m, 8H), 2.64 (deformed t,  $J_{\text{H,H}}$  = 8.1 Hz, 2H), 6.34 (s, 1H), 7.16–7.39 (m, 8H), 7.50 (d,  $J_{\text{H,H}}$  = 7.0 Hz,  $J_{\text{H},^{119}\text{Sn}}$  = 41.9 Hz, 1H), (**3al'**  $\delta$  2.30 (q,  $J_{\text{H,H}}$  = 7.5 Hz, 2H), 5.67 (t,  $J_{\text{H,H}}$  = 7.4 Hz, 1H));  $^{13}\text{C NMR}$  (100 MHz,  $\text{CDCl}_3$ ) for **3al**  $\delta$  11.0 ( $J_{\text{C},^{119}\text{Sn}}$  = 340.3 Hz,  $J_{\text{C},^{117}\text{Sn}}$  = 325.1 Hz), 13.6, 13.9, 23.1, 27.4 ( $J_{\text{C},^{119}\text{Sn}}$  = 62.0 Hz), 29.1 ( $J_{\text{C},^{119}\text{Sn}}$  = 19.7 Hz), 30.6, 32.9, 126.2, 126.5, 127.5, 127.6, 128.2, 128.7, 128.9, 137.3, 137.9, 140.9, 147.4, 152.2. **HRMS** (ESI) calcd for  $\text{C}_{26}\text{H}_{46}\text{Na}^{120}\text{Sn} [\text{M}+\text{Na}]^+$  549.2519, found 549.2546.

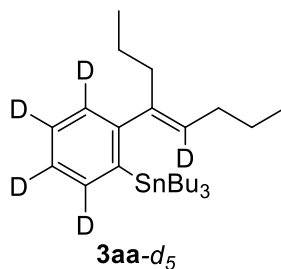

**Compound 3aa-d<sub>5</sub>.** (equation 1, 87% yield, colorless oil,  $R_f$  = 0.9 (hexanes)).  $^1\text{H NMR}$  (400 MHz,  $\text{CDCl}_3$ )  $\delta$  0.89 (t,  $J_{\text{H,H}}$  = 7.1 Hz, 9H+3H), 0.96 (t,  $J_{\text{H,H}}$  = 6.7 Hz, 3H), 0.99 (t,  $J_{\text{H,H}}$  = 8.1 Hz,  $J_{\text{H},^{119}\text{Sn}}$  = 51.0 Hz, 6H), 1.32 (sext,  $J_{\text{H,H}}$  = 7.1 Hz, 6H+2H), 1.42–1.51 (m, 8H), 2.14 (t,  $J_{\text{H,H}}$  = 7.5 Hz, 2H), 2.32 (t,  $J_{\text{H,H}}$  =

## Electronic Supplementary Information (ESI)

8.0 Hz, 2H);  $^{13}\text{C}$  NMR (100 MHz,  $\text{CDCl}_3$ )  $\delta$  10.8 ( $J_{\text{C},^{119}\text{Sn}} = 339.6$  Hz,  $J_{\text{C},^{117}\text{Sn}} = 324.7$  Hz), 13.6, 14.1, 14.4, 21.6, 22.9, 27.5 ( $J_{\text{C},^{119}\text{Sn}} = 61.0$  Hz), 29.2 ( $J_{\text{C},^{119}\text{Sn}} = 18.9$  Hz), 30.5, 34.9, 125.1 (t,  $J_{\text{C},^2\text{H}} = 23.8$  Hz), 126.9 (t,  $J_{\text{C},^2\text{H}} = 23.9$  Hz), 127.5 (t,  $J_{\text{C},^2\text{H}} = 23.2$  Hz), 129.2 (t,  $J_{\text{C},^2\text{H}} = 22.8$  Hz), 136.5 (t,  $J_{\text{C},^2\text{H}} = 23.9$  Hz), 140.5, 144.2 ( $J_{\text{C},^{119}\text{Sn}} = 14.6$  Hz), 152.6 ( $J_{\text{C},^{119}\text{Sn}} = 28.6$  Hz);  $^2\text{H}\{^1\text{H}\}$  NMR (61 MHz, acetone)  $\delta$  5.26 (s, 1H), 7.19 (s, 2H), 7.32 (s, 1H), 7.43 (s, 1H). HRMS (ESI) calcd for  $\text{C}_{26}\text{H}_{41}\text{D}_5\text{Na}^{120}\text{Sn}$   $[\text{M}+\text{Na}]^+$  506.2833, found 506.2838.

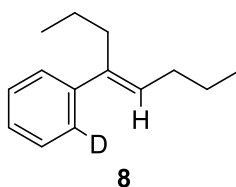

**Compound 8** [374107-00-3]. (Scheme 3, 98% yield, colorless oil,  $R_f = 0.9$  (hexanes)).  $^1\text{H}$  NMR (500 MHz,  $\text{CDCl}_3$ )  $\delta$  0.89 (t,  $J_{\text{H,H}} = 7.4$  Hz, 3H), 0.97 (t,  $J_{\text{H,H}} = 7.4$  Hz, 3H), 1.37 (sext,  $J_{\text{H,H}} = 7.6$  Hz, 2H), 1.48 (sext,  $J_{\text{H,H}} = 7.4$  Hz, 2H), 2.18 (q,  $J_{\text{H,H}} = 7.3$  Hz, 2H), 2.48 (t,  $J_{\text{H,H}} = 7.7$  Hz, 2H), 5.67 (t,  $J_{\text{H,H}} = 7.3$  Hz, 1H), 7.21 (td,  $J_{\text{H,H}} = 7.4$  Hz, 1.3 Hz, 1H), 7.30 (t,  $J_{\text{H,H}} = 6.9$  Hz, 1H), 7.30 (d,  $J_{\text{H,H}} = 6.7$  Hz, 1H), 7.34 (d,  $J_{\text{H,H}} = 7.7$  Hz, 1H);  $^{13}\text{C}$  NMR (100 MHz,  $\text{CDCl}_3$ )  $\delta$  13.9, 14.0, 21.8, 23.1, 30.6, 31.7, 126.0 (t,  $J_{\text{C},^2\text{H}} = 24.1$  Hz), 126.3, 128.0, 128.1, 129.2, 140.0, 143.5. The spectral data are in agreement with reported literature values.<sup>15</sup>

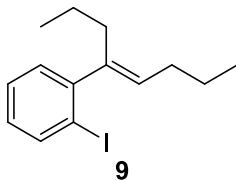

**Compound 9.** (Scheme 3, 96% yield, colorless oil,  $R_f = 0.8$  (hexanes)).  $^1\text{H}$  NMR (400 MHz,  $\text{CDCl}_3$ )  $\delta$  0.98 (t,  $J_{\text{H,H}} = 7.3$  Hz, 3H), 1.07 (t,  $J_{\text{H,H}} = 7.4$  Hz, 3H), 1.39 (sext,  $J_{\text{H,H}} = 7.8$  Hz, 2H), 1.57 (sext,  $J_{\text{H,H}} = 7.3$  Hz, 2H), 2.25 (q,  $J_{\text{H,H}} = 7.3$  Hz, 2H), 2.46 (t,  $J_{\text{H,H}} = 7.8$  Hz, 2H), 5.37 (t,  $J_{\text{H,H}} = 7.3$  Hz, 1H), 6.95 (td,  $J_{\text{H,H}} = 7.7$  Hz, 1.7 Hz, 1H), 7.17 (dd,  $J_{\text{H,H}} = 7.5$  Hz, 1.7 Hz, 1H), 7.31 (td,  $J_{\text{H,H}} = 7.5$  Hz, 1.2 Hz, 1H), 7.89 (dd,  $J_{\text{H,H}} = 7.9$  Hz, 1.1 Hz, 1H);  $^{13}\text{C}$  NMR (100 MHz,  $\text{CDCl}_3$ )  $\delta$  14.0, 14.2, 21.2, 22.7, 30.0, 33.5, 99.4, 127.5, 127.8, 129.6, 131.3, 139.0, 143.3, 149.1. HRMS (ESI) calcd for  $\text{C}_{14}\text{H}_{20}\text{I}$   $[\text{M}+\text{H}]^+$  315.0610, found 315.0613.

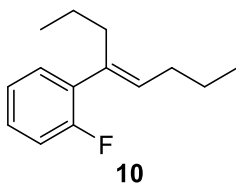

**Compound 10** [1092526-15-2]. (Scheme 3, 69% yield, colorless oil,  $R_f = 0.9$  (hexanes)).  $^1\text{H}$  NMR (400 MHz,  $\text{CDCl}_3$ )  $\delta$  0.86 (t,  $J_{\text{H,H}} = 7.3$  Hz, 3H), 0.96 (t,  $J_{\text{H,H}} = 7.4$  Hz, 3H), 1.30 (sext,  $J_{\text{H,H}} = 7.4$  Hz, 2H), 1.47 (sext,  $J_{\text{H,H}} = 7.4$  Hz, 2H), 2.18 (q,  $J_{\text{H,H}} = 7.3$  Hz, 2H), 2.44 (t,  $J_{\text{H,H}} = 7.6$  Hz, 2H), 5.50

## Electronic Supplementary Information (ESI)

(t,  $J_{\text{H,H}} = 7.2$  Hz, 1H), 6.99 (dd,  $J_{\text{H,H}} = 8.4$  Hz,  $J_{\text{H},^{19}\text{F}} = 10.6$  Hz, 1H), 7.06 (dd,  $J_{\text{H,H}} = 7.4$  Hz, 1.2 Hz, 1H), 7.17 (d,  $J_{\text{H,H}} = 7.2$  Hz, 1H), 7.19–7.23 (m, 1H);  $^{13}\text{C}$  NMR (100 MHz,  $\text{CDCl}_3$ )  $\delta$  13.8, 21.5, 22.9, 30.3, 32.5, 115.4 (d,  $J_{\text{C},^{19}\text{F}} = 23.1$  Hz), 123.7 (d,  $J_{\text{C},^{19}\text{F}} = 3.2$  Hz), 126.4, 127.9 (d,  $J_{\text{C},^{19}\text{F}} = 8.0$  Hz), 130.6 (d,  $J_{\text{C},^{19}\text{F}} = 4.6$  Hz), 131.9 (d,  $J_{\text{C},^{19}\text{F}} = 14.6$  Hz), 136.1, 160.0 (d,  $J_{\text{C},^{19}\text{F}} = 245.8$  Hz). The spectral data are in agreement with reported literature values.<sup>16</sup>

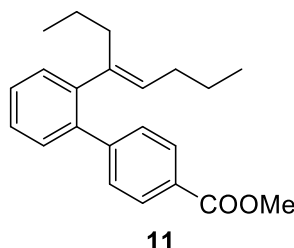

**Compound 11.** (Scheme 3, 83% yield, pale yellow oil,  $R_f = 0.4$  (hexanes)).  $^1\text{H}$  NMR (400 MHz,  $\text{CDCl}_3$ )  $\delta$  0.69 (t,  $J_{\text{H,H}} = 7.3$  Hz, 3H), 0.91 (t,  $J_{\text{H,H}} = 7.4$  Hz, 3H), 1.10 (sext,  $J_{\text{H,H}} = 7.5$  Hz, 2H), 1.40 (sext,  $J_{\text{H,H}} = 7.3$  Hz, 2H), 1.79 (t,  $J_{\text{H,H}} = 7.7$  Hz, 2H), 2.06 (q,  $J_{\text{H,H}} = 7.3$  Hz, 2H), 3.93 (s, 3H), 5.48 (t,  $J_{\text{H,H}} = 7.3$  Hz, 1H), 7.20–7.33 (m, 4H), 7.50 (d,  $J_{\text{H,H}} = 8.3$  Hz, 2H), 8.01 (d,  $J_{\text{H,H}} = 8.3$  Hz, 2H);  $^{13}\text{C}$  NMR (100 MHz,  $\text{CDCl}_3$ )  $\delta$  13.9, 21.5, 22.8, 30.3, 32.9, 52.0, 126.8, 127.6, 128.3, 129.1, 129.2, 129.7, 130.4, 132.2, 138.6, 141.2, 143.6, 147.2, 167.2. HRMS (ESI) calcd for  $\text{C}_{22}\text{H}_{27}\text{O}_2$   $[\text{M}+\text{H}]^+$  323.2011, found 323.1995.

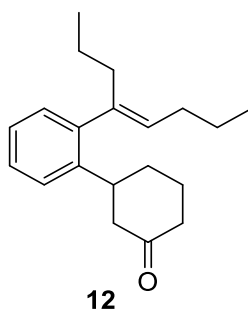

**Compound 12.** (Scheme 3, 87% yield, colorless oil,  $R_f = 0.4$  (hexanes)).  $^1\text{H}$  NMR (400 MHz,  $\text{CDCl}_3$ )  $\delta$  0.87 (t,  $J_{\text{H,H}} = 7.3$  Hz, 3H), 0.94 (t,  $J_{\text{H,H}} = 7.4$  Hz, 3H), 1.27 (sext d,  $J_{\text{H,H}} = 7.8$  Hz, 2.2 Hz, 2H), 1.43 (sext,  $J_{\text{H,H}} = 7.3$  Hz, 2H), 1.69 (qt,  $J_{\text{H,H}} = 12.8$  Hz, 4.5 Hz, 1H), 1.82 (qd,  $J_{\text{H,H}} = 12.3$  Hz, 3.2 Hz, 1H), 1.91 (br d,  $J_{\text{H,H}} = 13.2$  Hz, 1H), 2.14 (q,  $J_{\text{H,H}} = 7.4$  Hz, 2H), 2.11–2.20 (m, 1H), 2.22–2.31 (m, 2H), 2.38 (td,  $J_{\text{H,H}} = 14.5$  Hz, 6.6 Hz, 1H), 2.4–2.5 (m, 1H), 2.45 (br d,  $J_{\text{H,H}} = 14.1$  Hz, 1H), 2.53 (t,  $J_{\text{H,H}} = 13.8$  Hz, 1H), 3.23 (tt,  $J_{\text{H,H}} = 12.2$  Hz, 3.9 Hz, 1H), 5.21 (t,  $J_{\text{H,H}} = 7.3$  Hz, 1H), 7.05 (dd,  $J_{\text{H,H}} = 7.5$  Hz, 1.0 Hz, 1H), 7.15 (td,  $J_{\text{H,H}} = 7.3$  Hz, 1.6 Hz, 1H), 7.25 (td,  $J_{\text{H,H}} = 7.8$  Hz, 1.2 Hz, 1H), 7.29 (dd,  $J_{\text{H,H}} = 7.7$  Hz, 1.4 Hz, 1H);  $^{13}\text{C}$  NMR (100 MHz,  $\text{CDCl}_3$ )  $\delta$  13.9, 14.2, 21.3, 23.0, 25.9, 30.1, 33.4, 34.9, 40.6, 41.2, 49.3, 125.6, 125.8, 126.8, 129.5, 130.4, 139.6, 141.7, 143.8, 211.1. HRMS (ESI) calcd for  $\text{C}_{20}\text{H}_{29}\text{O}$   $[\text{M}+\text{H}]^+$  285.2218, found 285.2221.

10. Single crystal X-ray diffraction data for compound 3ag (CCDC 1841177)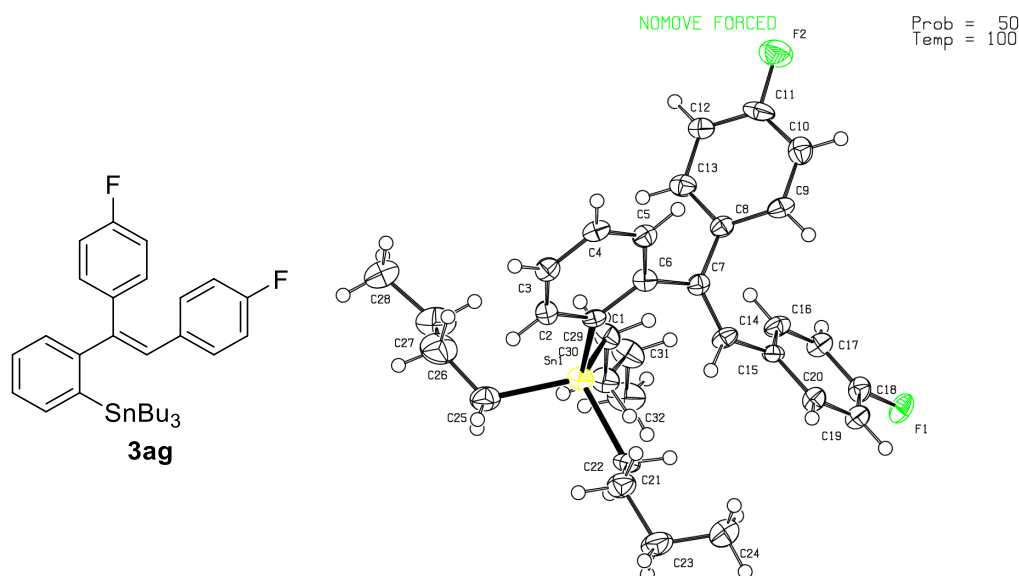**Table S1. Crystal data and structure refinement for compound 3ag**

|                                 |                                                                    |                              |
|---------------------------------|--------------------------------------------------------------------|------------------------------|
| Empirical formula               | $C_{32}H_{40}F_2Sn$                                                |                              |
| Formula weight                  | 581.33 g/mol                                                       |                              |
| Temperature                     | 100(2) K                                                           |                              |
| Wavelength                      | 0.71073 Å                                                          |                              |
| Crystal size                    | 0.020 x 0.040 x 0.320 mm                                           |                              |
| Crystal habit                   | colorless needle                                                   |                              |
| Crystal system                  | Monoclinic                                                         |                              |
| Space group                     | P 1 21/c 1                                                         |                              |
| Unit cell dimensions            | $a = 17.1715(13)$ Å                                                | $\alpha = 90^\circ$ .        |
|                                 | $b = 17.8894(14)$ Å                                                | $\beta = 101.309(3)^\circ$ . |
|                                 | $c = 9.4518(7)$ Å                                                  | $\gamma = 90^\circ$ .        |
| Volume                          | $2847.1(4)$ Å <sup>3</sup>                                         |                              |
| Z                               | 4                                                                  |                              |
| Density (calculated)            | $1.356$ g/cm <sup>3</sup>                                          |                              |
| Absorption coefficient          | $0.928$ mm <sup>-1</sup>                                           |                              |
| F(000)                          | 1200                                                               |                              |
| Theta range for data collection | 2.48 to $27.94^\circ$ .                                            |                              |
| Index ranges                    | $-22 \leq h \leq 20$ , $-22 \leq k \leq 23$ , $-12 \leq l \leq 11$ |                              |
| Reflections collected           | 16876                                                              |                              |
| Independent reflections         | 6610 [R(int) = 0.0945]                                             |                              |

## Electronic Supplementary Information (ESI)

---

|                                     |                                                            |
|-------------------------------------|------------------------------------------------------------|
| Coverage of independent reflections | 96.5%                                                      |
| Absorption correction               | Multi-Scan                                                 |
| Max. and min. transmission          | 0.9820 and 0.7560                                          |
| Structure solution technique        | direct methods                                             |
| Structure solution program          | XT, VERSION 2014/5                                         |
| Refinement method                   | Full-matrix least-squares on $F^2$                         |
| Refinement program                  | SHELXL-2016/6 (Sheldrick, 2016)                            |
| Function minimized                  | $\Sigma w(F_o^2 - F_c^2)^2$                                |
| Data / restraints / parameters      | 6610 / 0 / 319                                             |
| Goodness-of-fit on $F^2$            | 1.014                                                      |
| Final R indices                     | 3523 data; $I > 2\sigma(I)$ $R1 = 0.0663$ , $wR2 = 0.1362$ |
|                                     | all data $R1 = 0.1468$ , $wR2 = 0.1726$                    |
| Weighting scheme                    | $w = 1/[\sigma^2(F_o^2) + (0.0685P)^2]$                    |
|                                     | where $P = (F_o^2 + 2F_c^2)/3$                             |
| Largest diff. peak and hole         | 1.424 and $-1.680 \text{ e}\text{\AA}^{-3}$                |
| R.M.S. deviation from mean          | $0.155 \text{ e}\text{\AA}^{-3}$                           |

**11. Reference**

- [1] A. van der Ent and A. L. Onderdelinden, *Inorg. Synth.*, 1990, **28**, 90.
- [2] G. Giordano and R. H. Crabtree, *Inorg. Synth.*, 1979, **19**, 218.
- [3] (a) T. Hayashi, M. Takahashi, Y. Takaya and M. Ogasawara, *J. Am. Chem. Soc.*, 2002, **124**, 5052.  
(b) G. E. Rudebusch, L. N. Zakharov and S. Y. Liu, *Angew. Chem. Int. Ed.*, 2013, **52**, 9316.
- [4] P. Tang, T. Furuya and T. Ritter, *J. Am. Chem. Soc.*, 2010, **132**, 12150.
- [5] Y. Horino, M. Sugata, I. Mutsuura, K. Tomohara and H. Abe, *Org. Lett.*, 2017, **19**, 5968.
- [6] T. Kusakabe, Y. Ito, M. Kamimura, T. Shirai, K. Takahashi, T. Mochida and K. Kato, *Asian J. Org. Chem.*, 2017, **6**, 1086.
- [7] M. B. Faraoni, L. C. Koll, S. D. Mandolesi, A. E. Zúñiga and J. C. Podestá, *J. Organomet. Chem.*, 2000, **613**, 236.
- [8] (a) K. Mochida, *Bull. Chem. Soc. Jpn.*, 1987, **60**, 3299; (b) V. V. Sharutin, O. K. Sharutina, V. S. Senchurin, T. A. Kovaleva, V. I. Shcherbakov and E. N. Gladyshev, *Russ. J. Gen. Chem.*, 2000, **70**, 64.
- [9] K. Komeyama, R. Asakura and K. Takaki, *Org. Biomol. Chem.*, 2015, **13**, 8713.
- [10] A. Nagaki, Y. Tomida, H. Usutani, H. Kim, N. Takabayashi, T. Nokami, H. Okamoto and J. Yoshida, *Chem. Asian J.*, 2007, **2**, 1513.
- [11] (a) D. E. Seitz, G. L. Tonnesen, S. Hellman, R. N. Hanson and S. J. Adelstein, *J. Organomet. Chem.*, 1980, **186**, C33; (b) Y. Gu and R. Martin, *Angew. Chem. Int. Ed.*, 2017, **56**, 3187.
- [12] D. E. Seitz, R. A. Milius and H. El-Wakil, *Synth. Commun.*, 1981, **11**, 281.
- [13] T. Furuya, A. E. Strom and T. Ritter, *J. Am. Chem. Soc.*, 2009, **131**, 1662.
- [14] G. P. Roth, V. Farina, L. S. Liebeskind and E. Peña-Cabrera, *Tetrahedron Lett.*, 1995, **36**, 2191.
- [15] T. Hayashi, K. Inoue, N. Taniguchi and M. Ogasawara, *J. Am. Chem. Soc.*, 2001, **123**, 9918.
- [16] Y. Nakao, N. Kashiwara, K. S. Kanyiva and T. Hiyama, *J. Am. Chem. Soc.*, 2008, **130**, 16170.



12. NMR spectra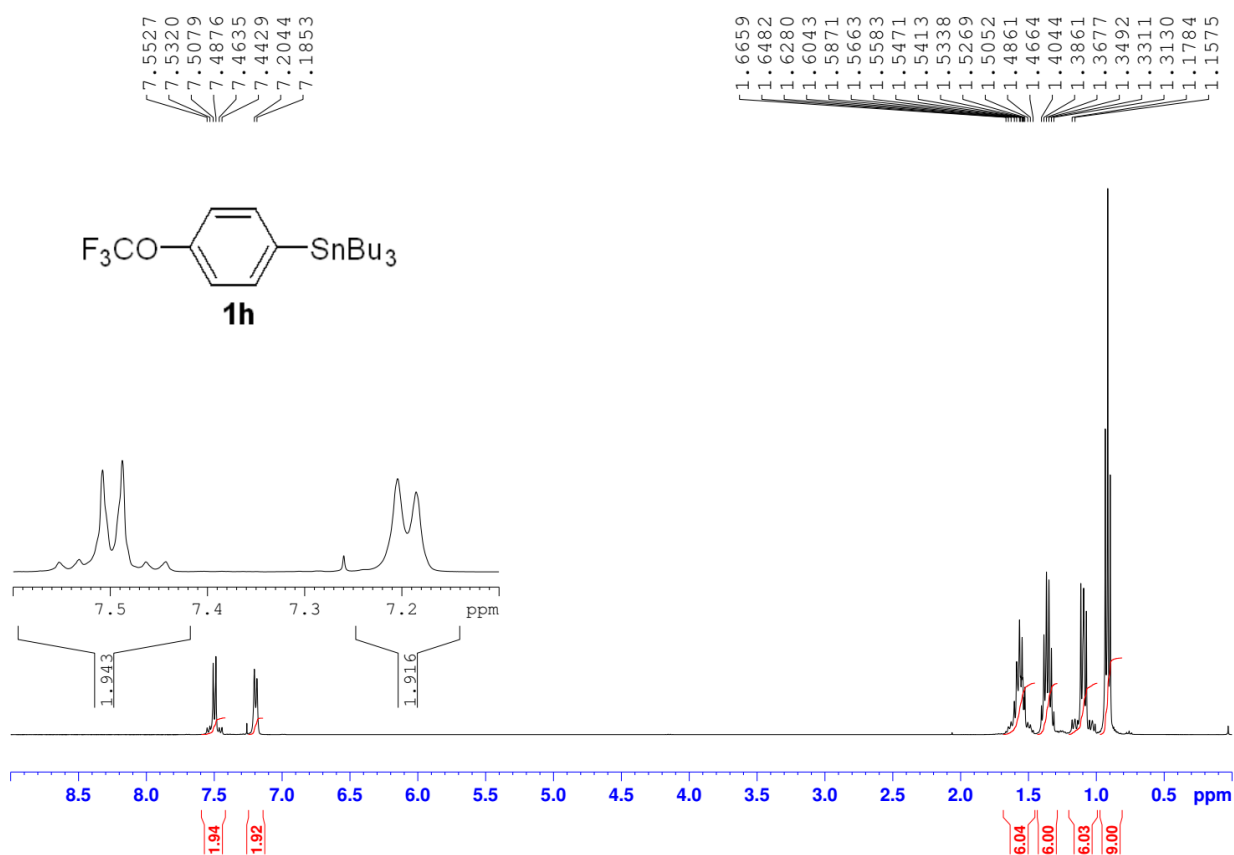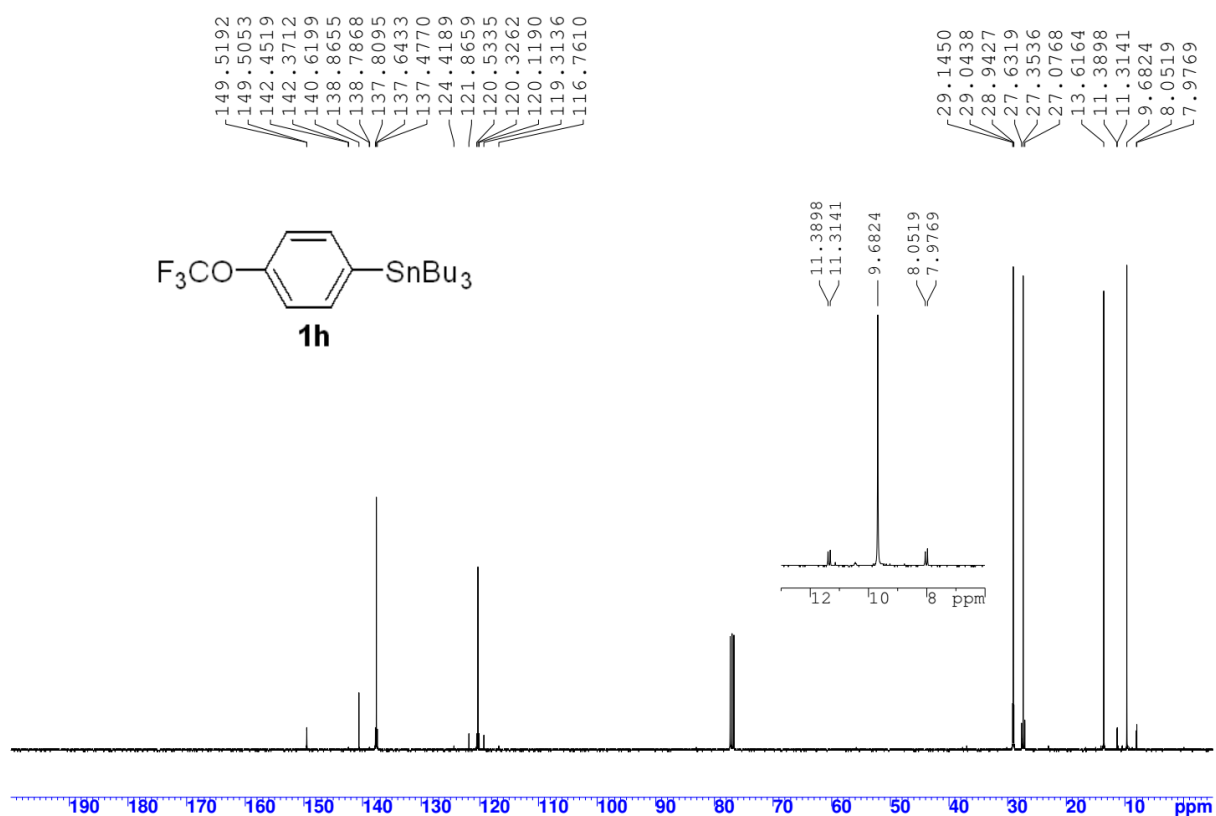

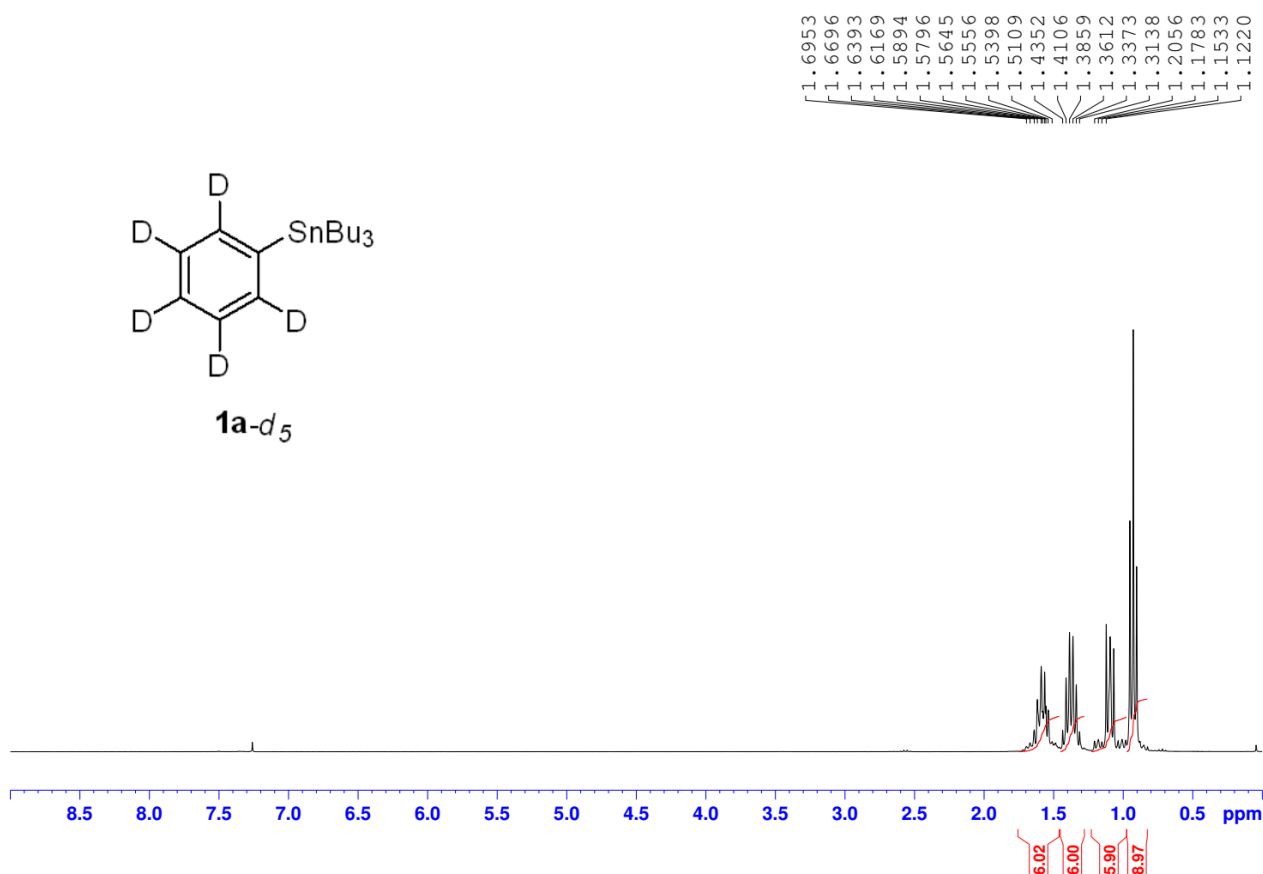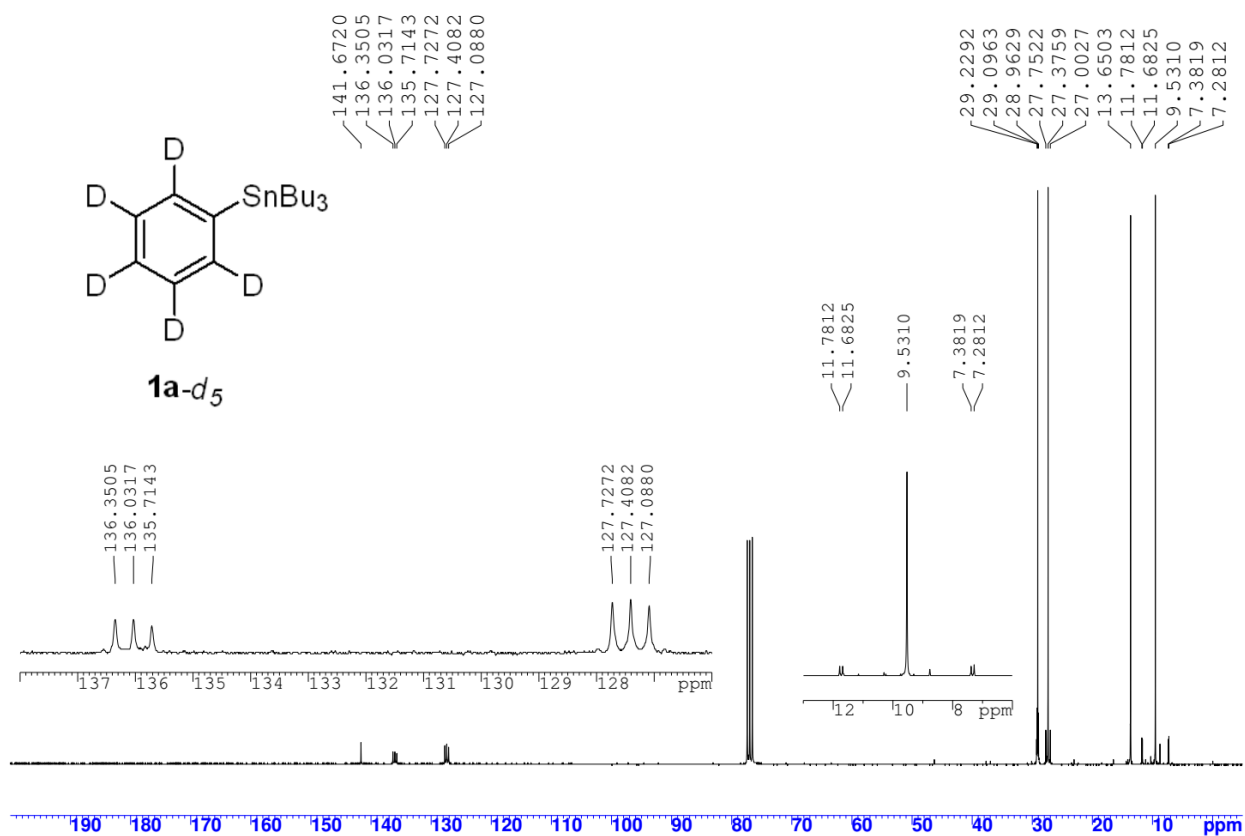

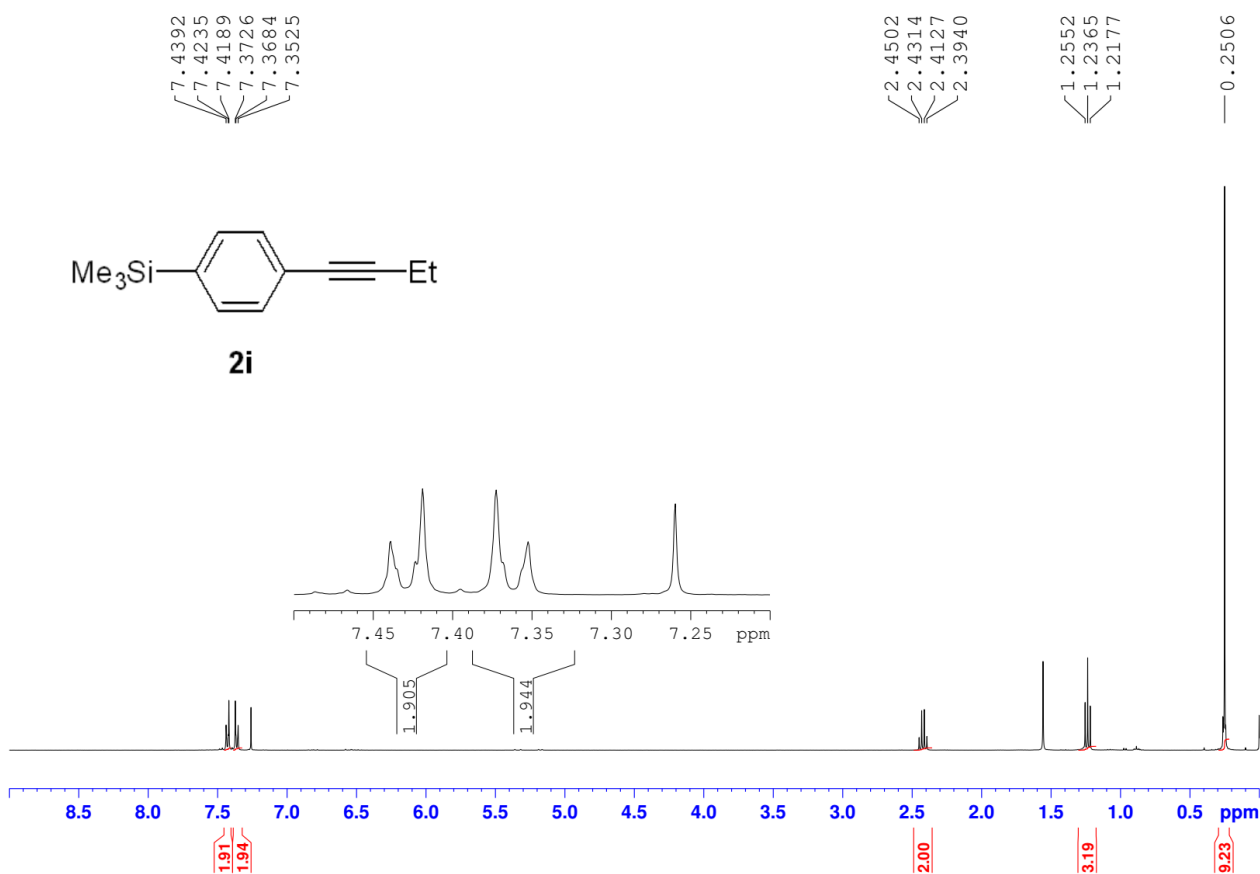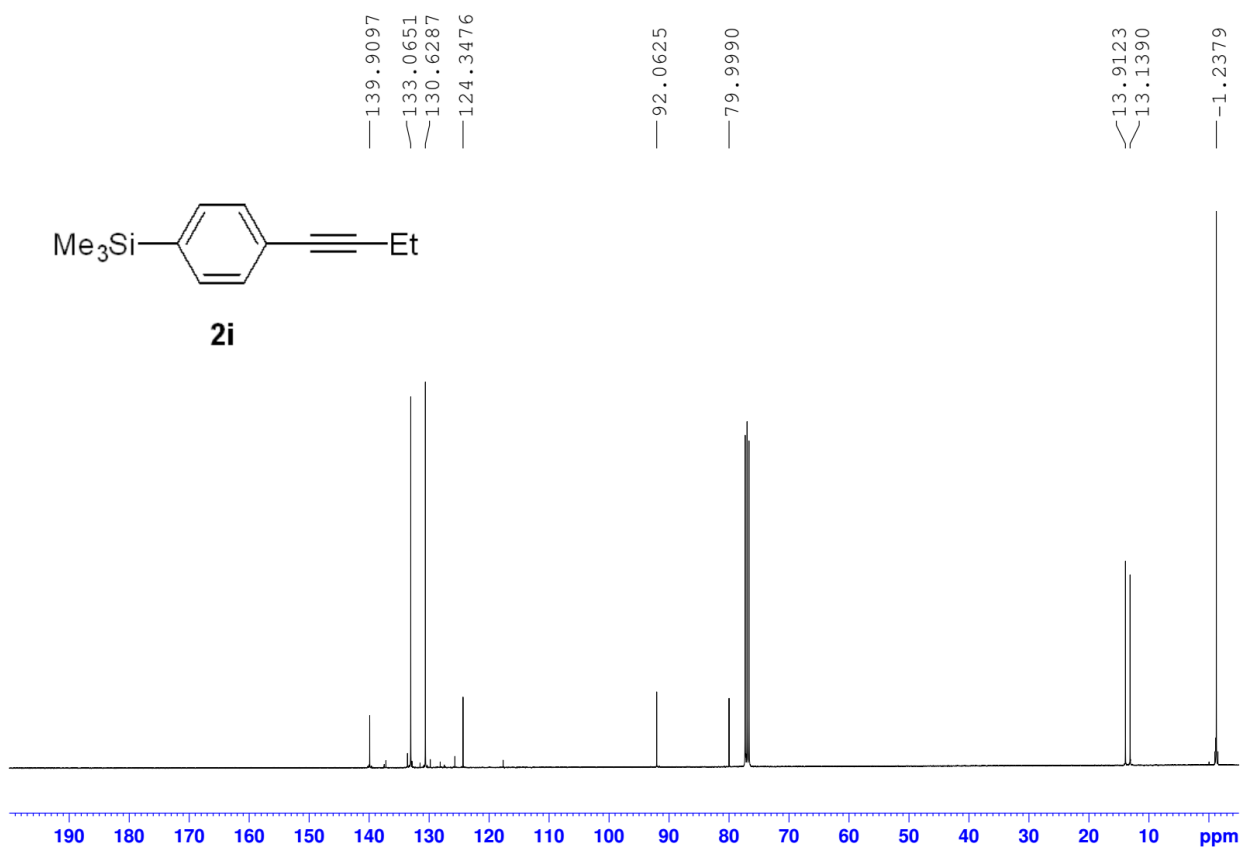

# Electronic Supplementary Information (ESI)

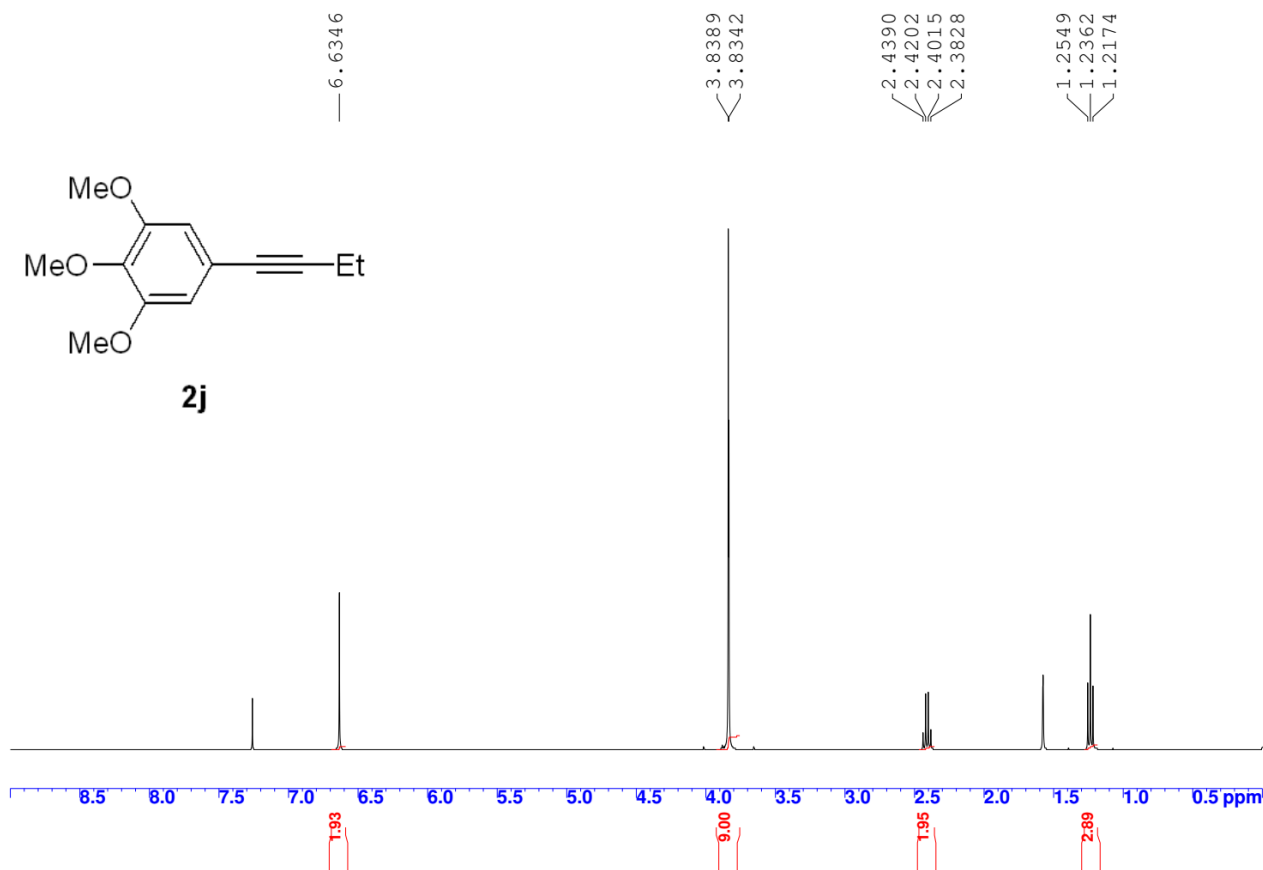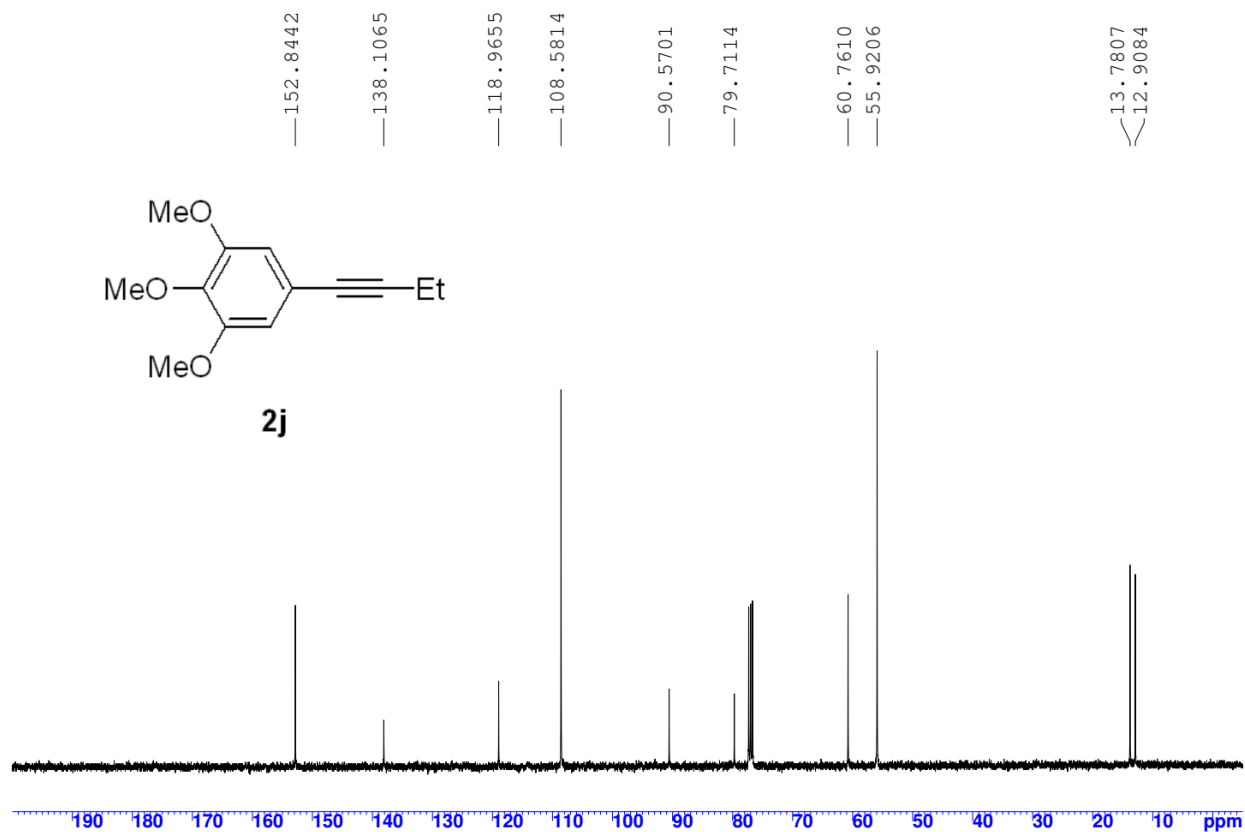

# Electronic Supplementary Information (ESI)

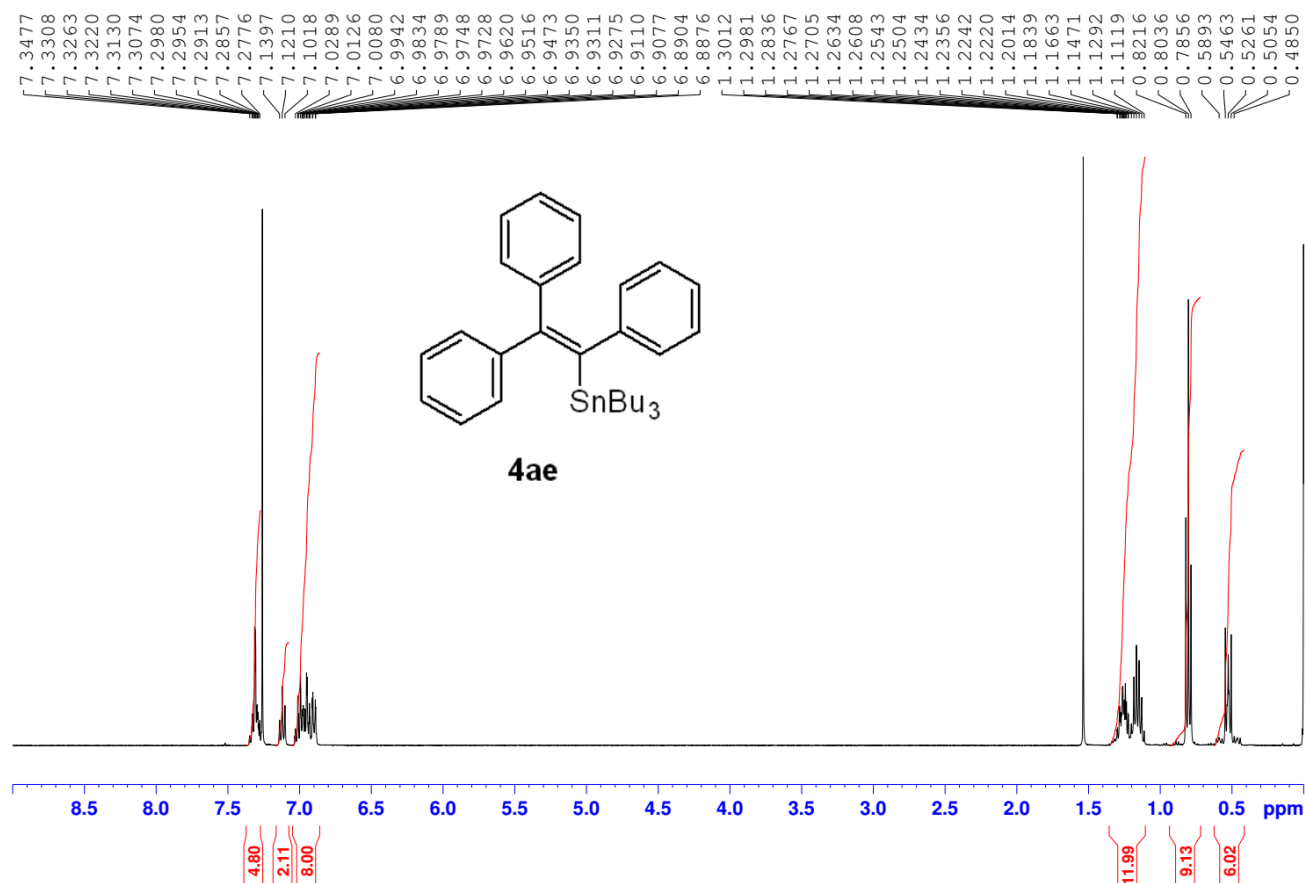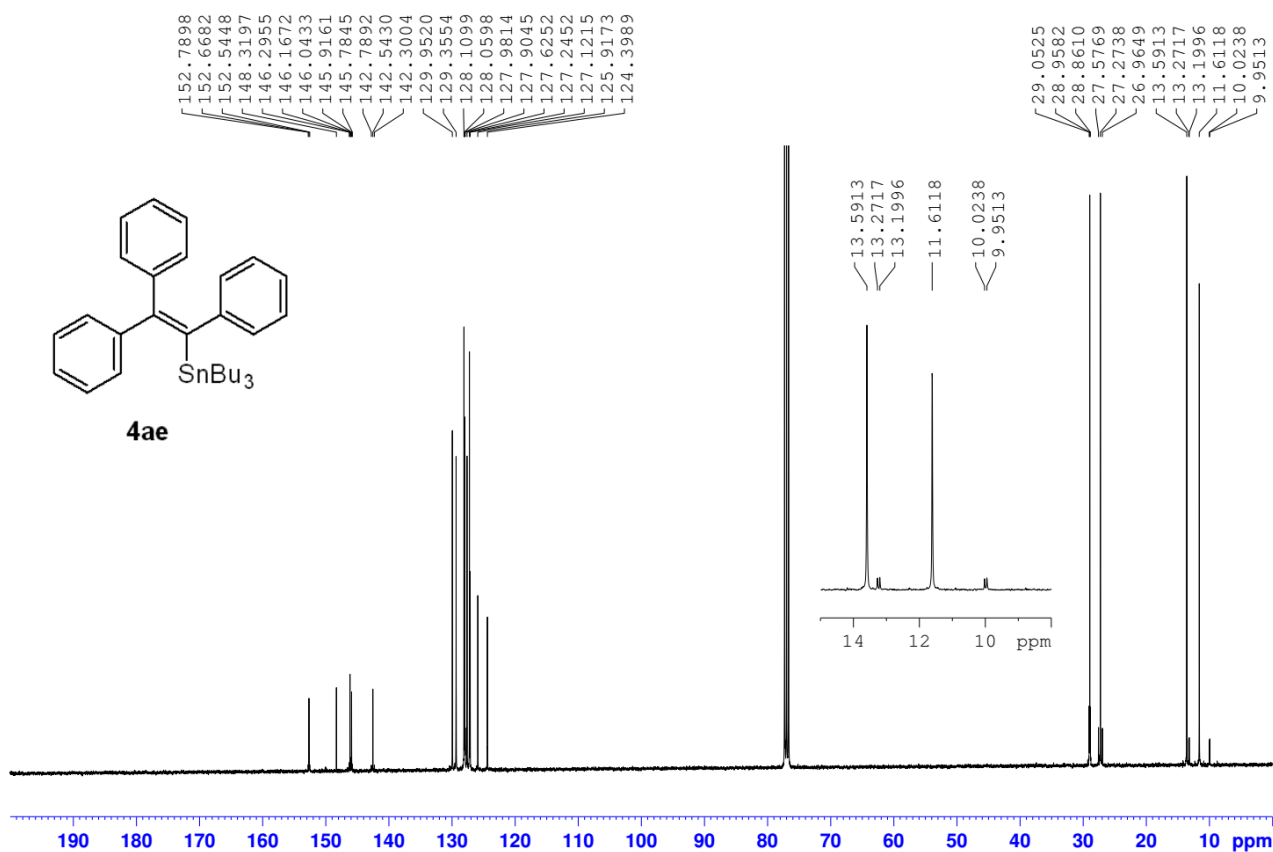

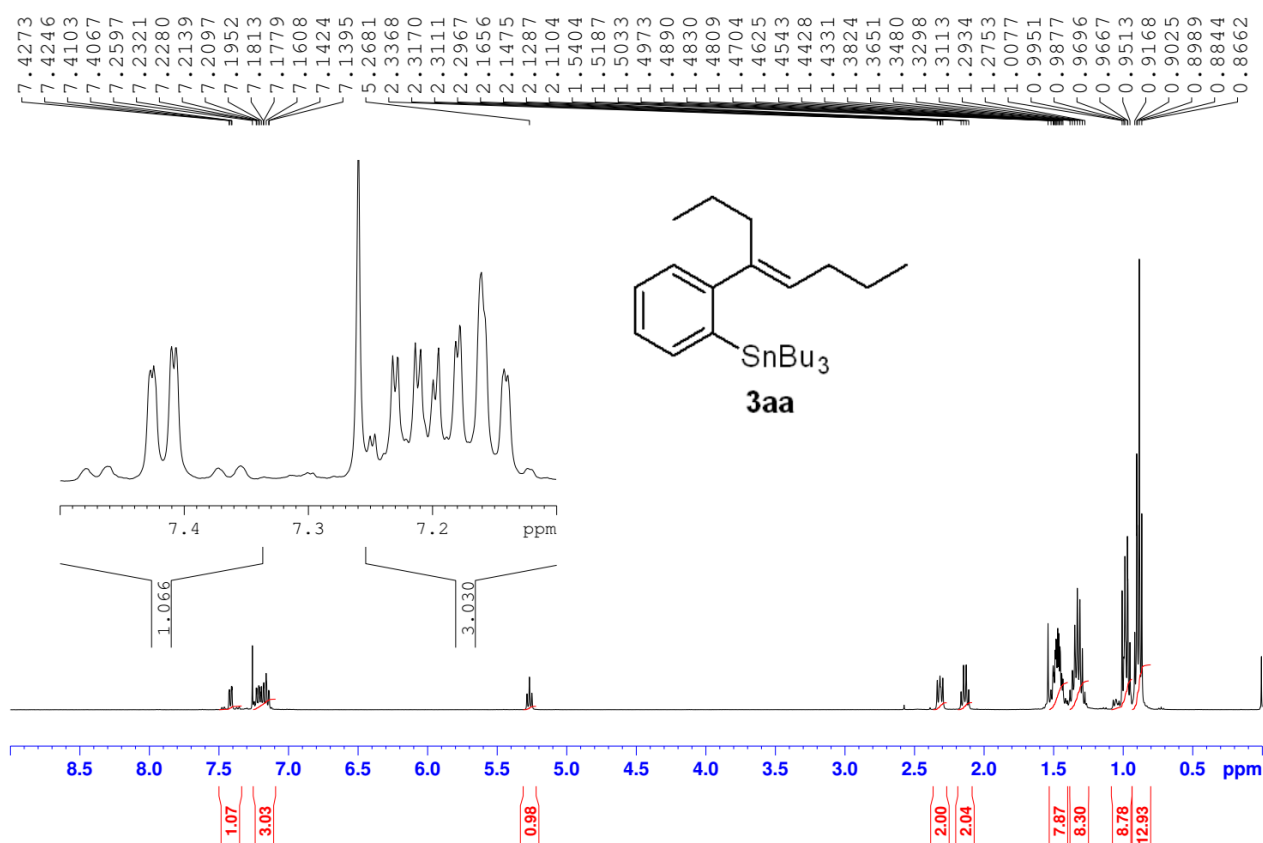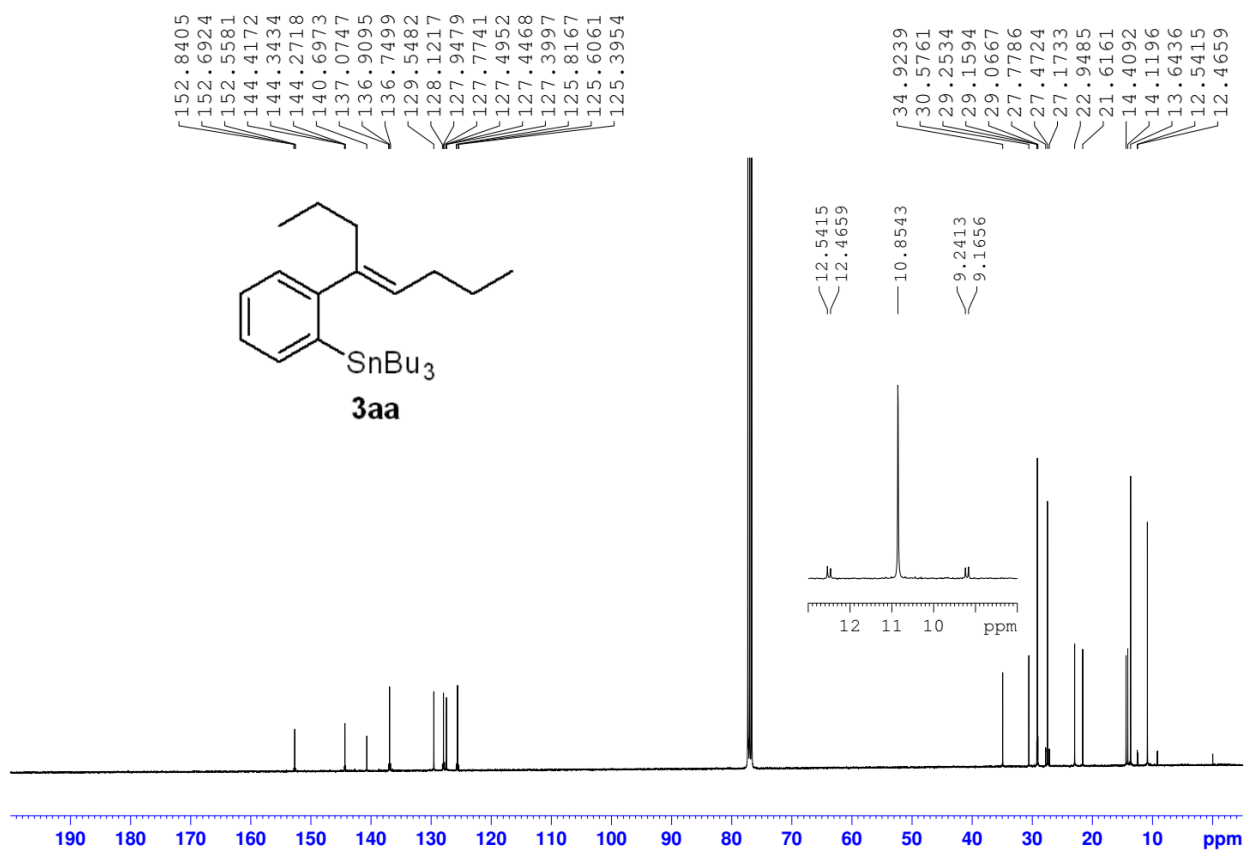

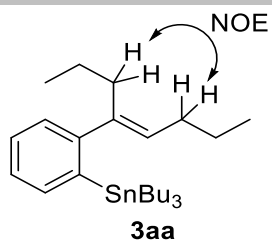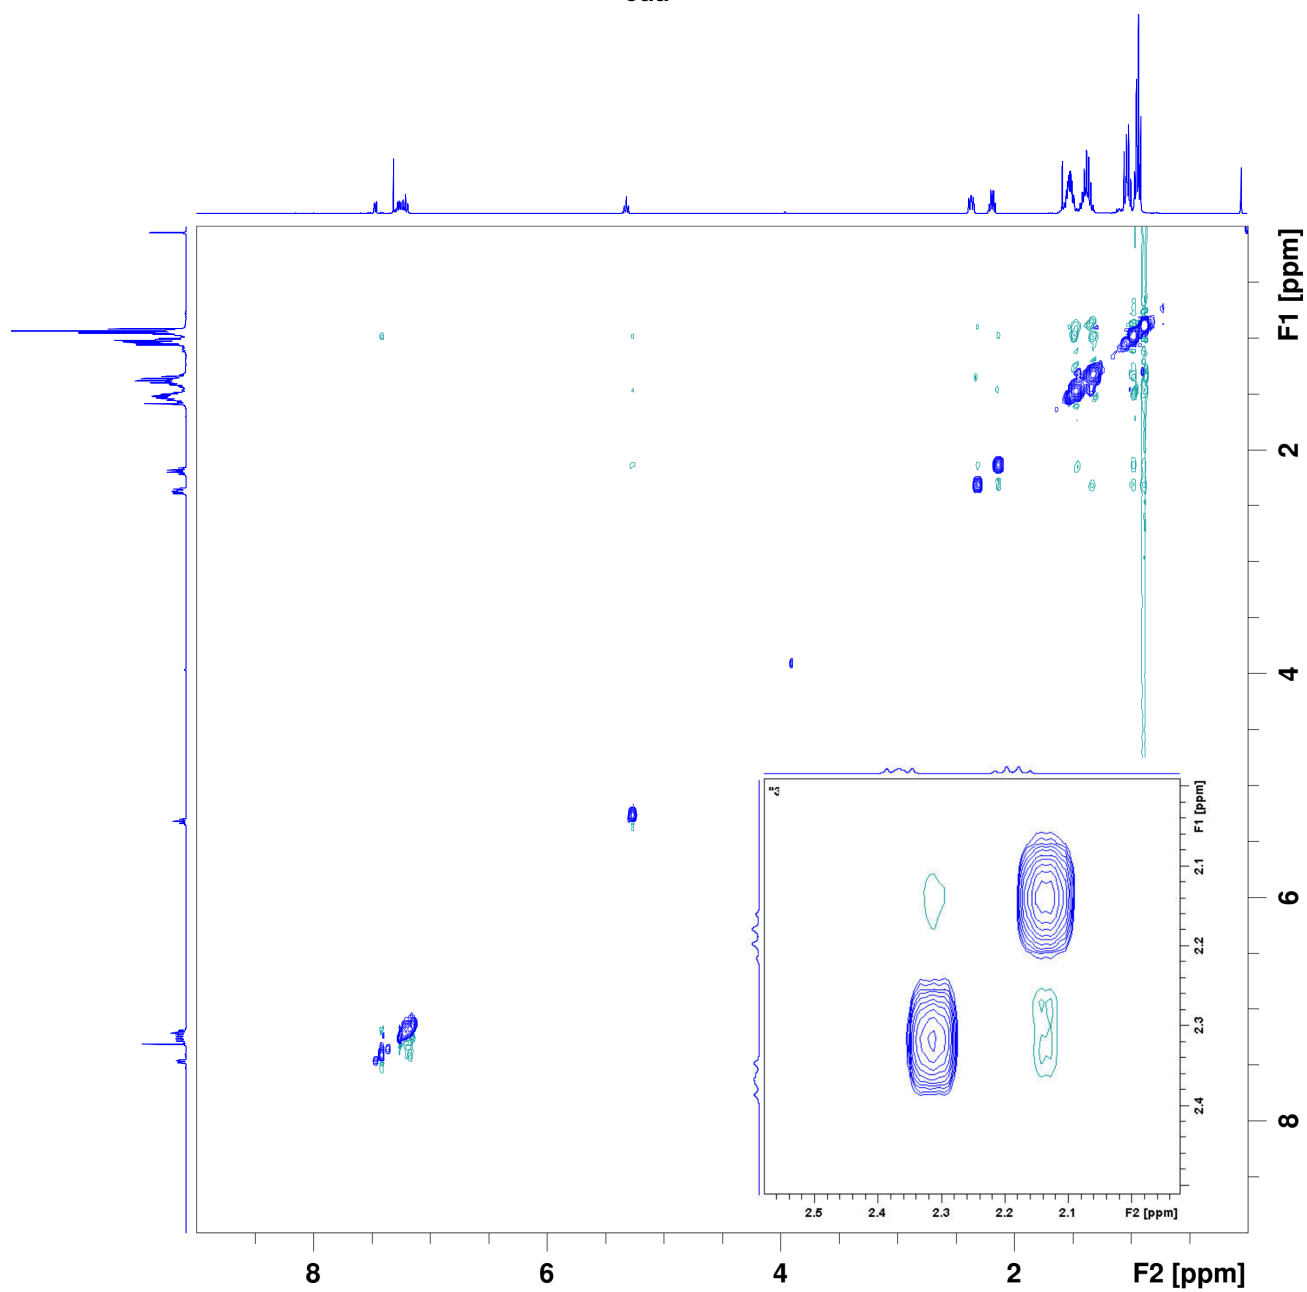

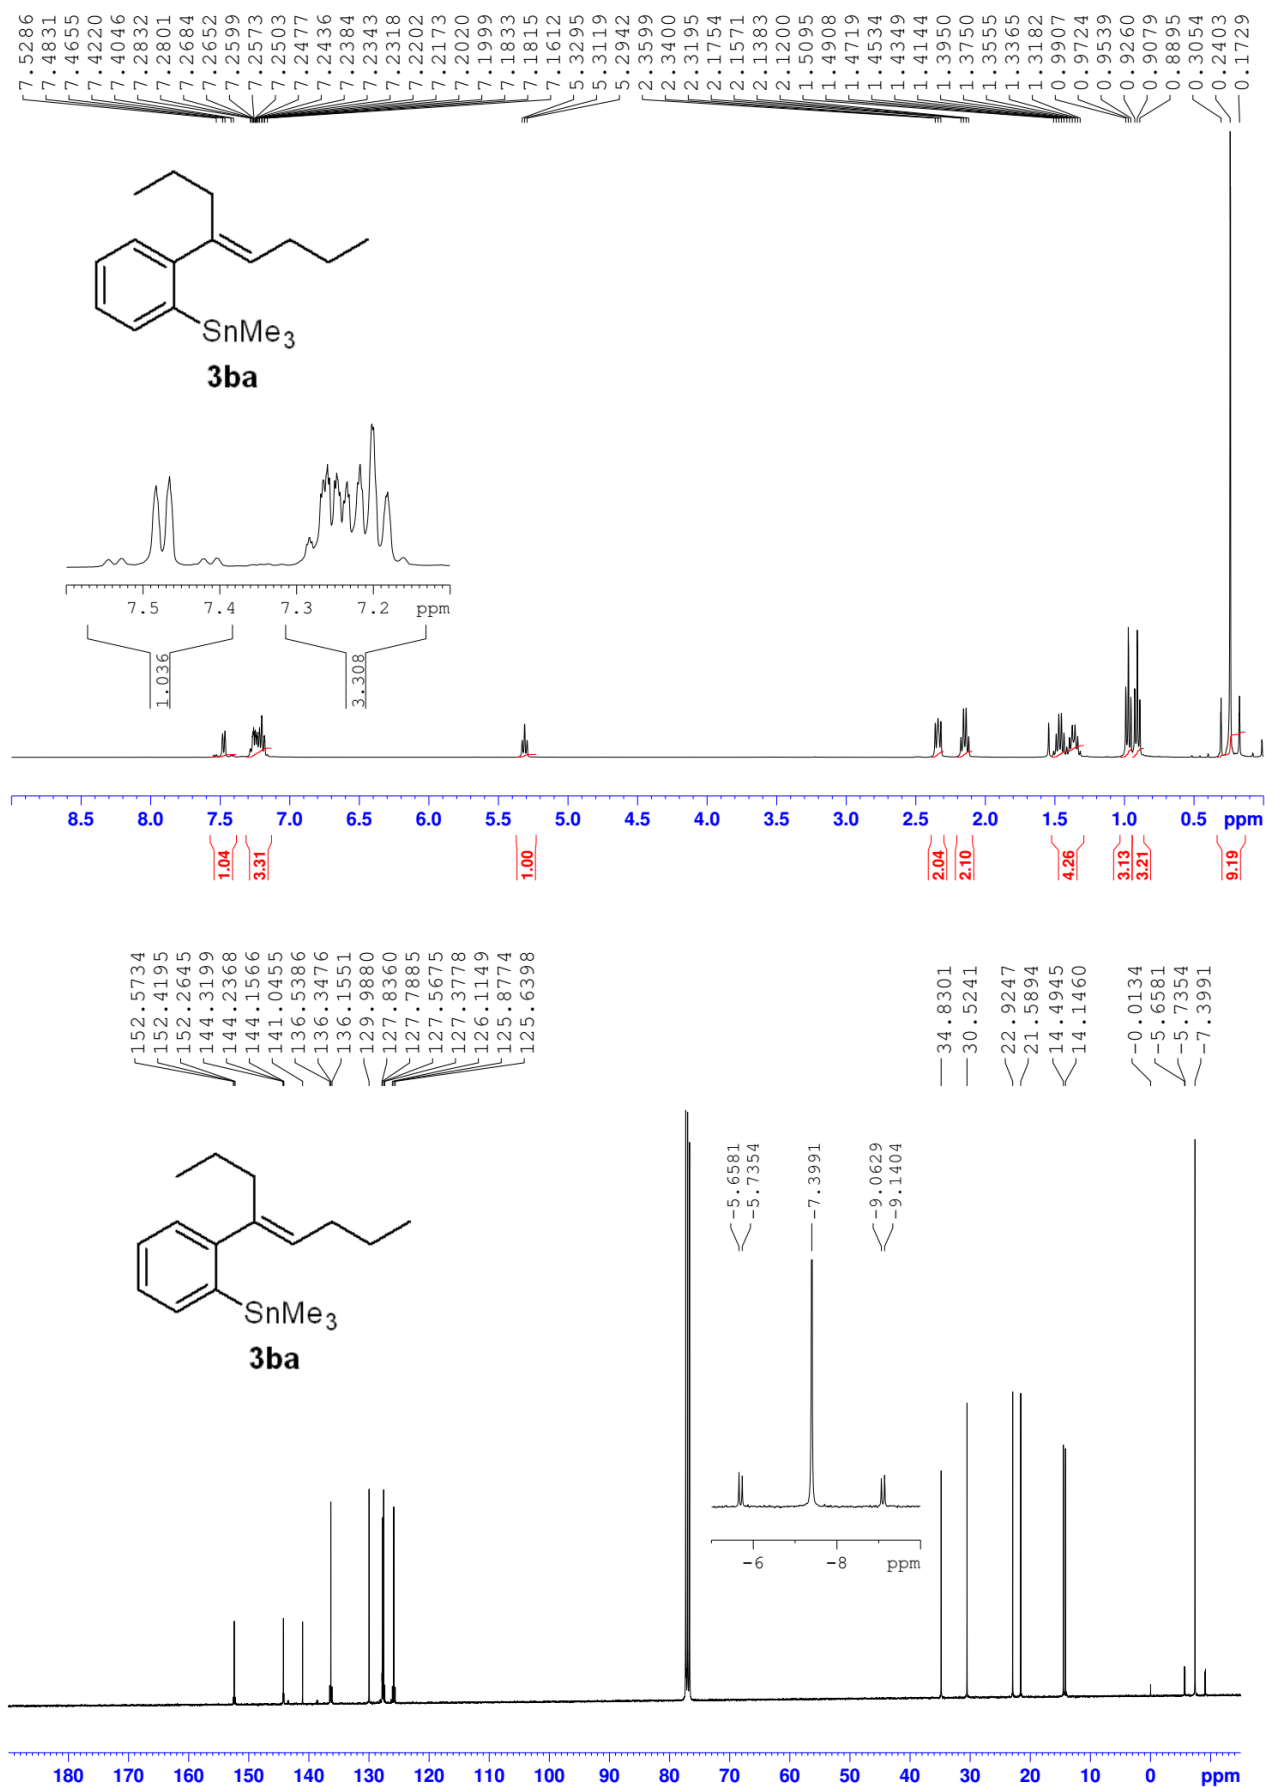



# Electronic Supplementary Information (ESI)

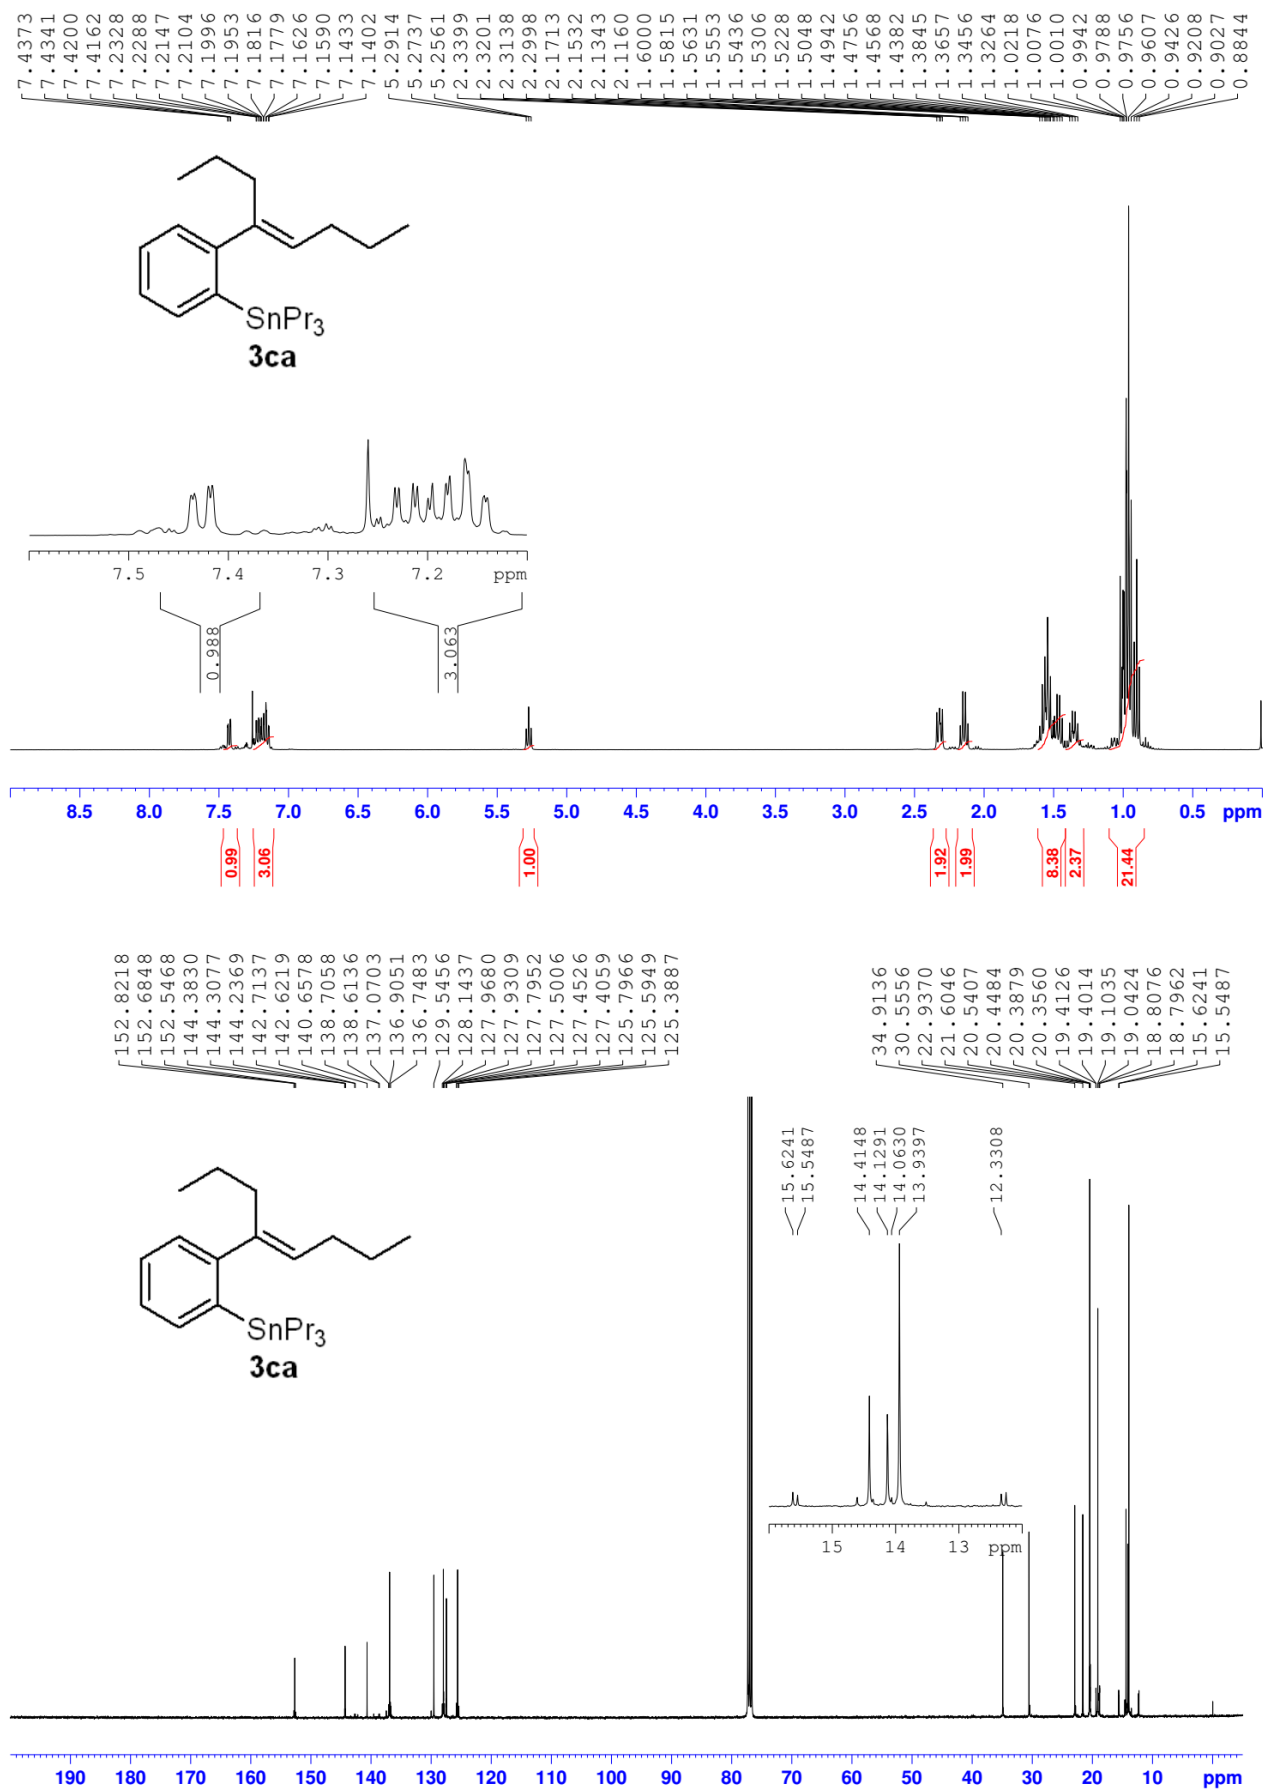

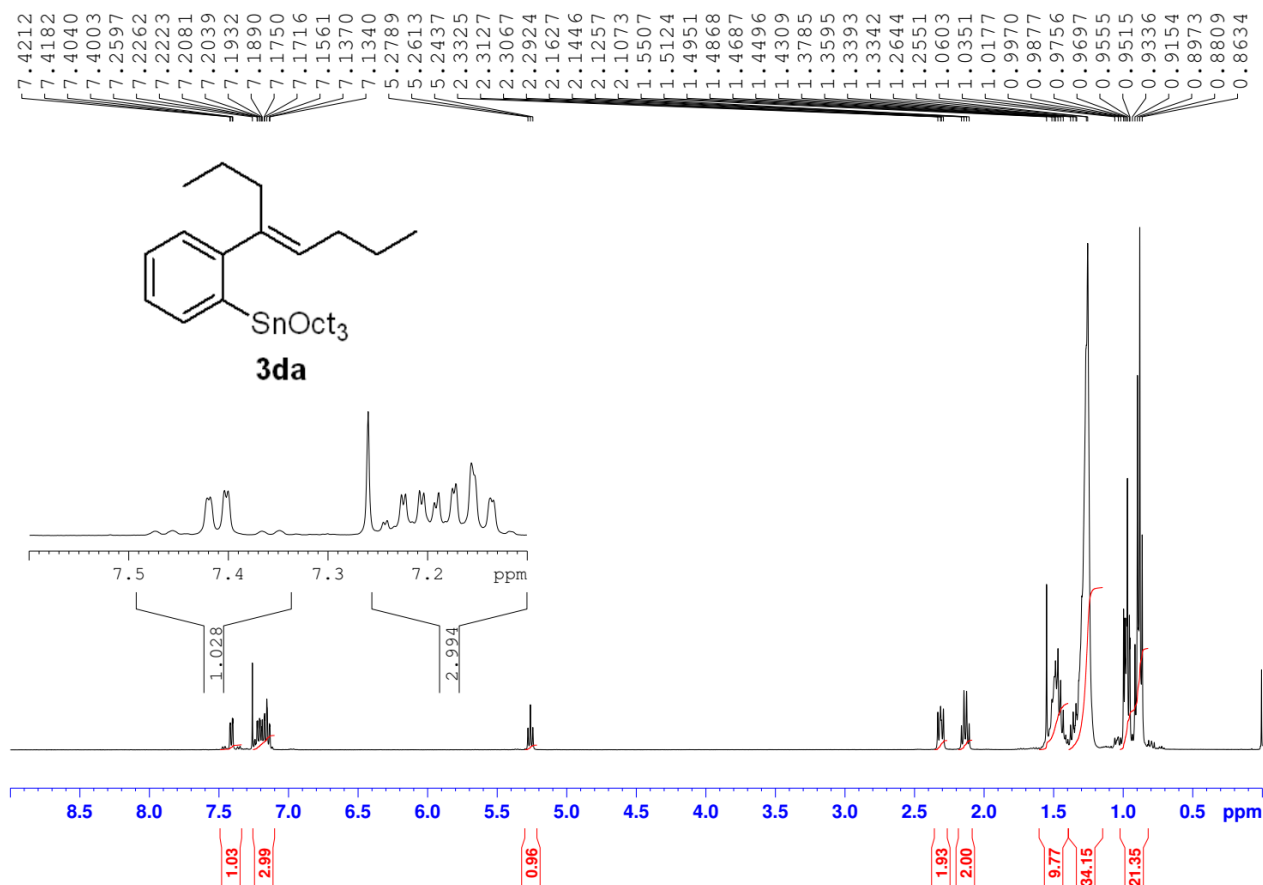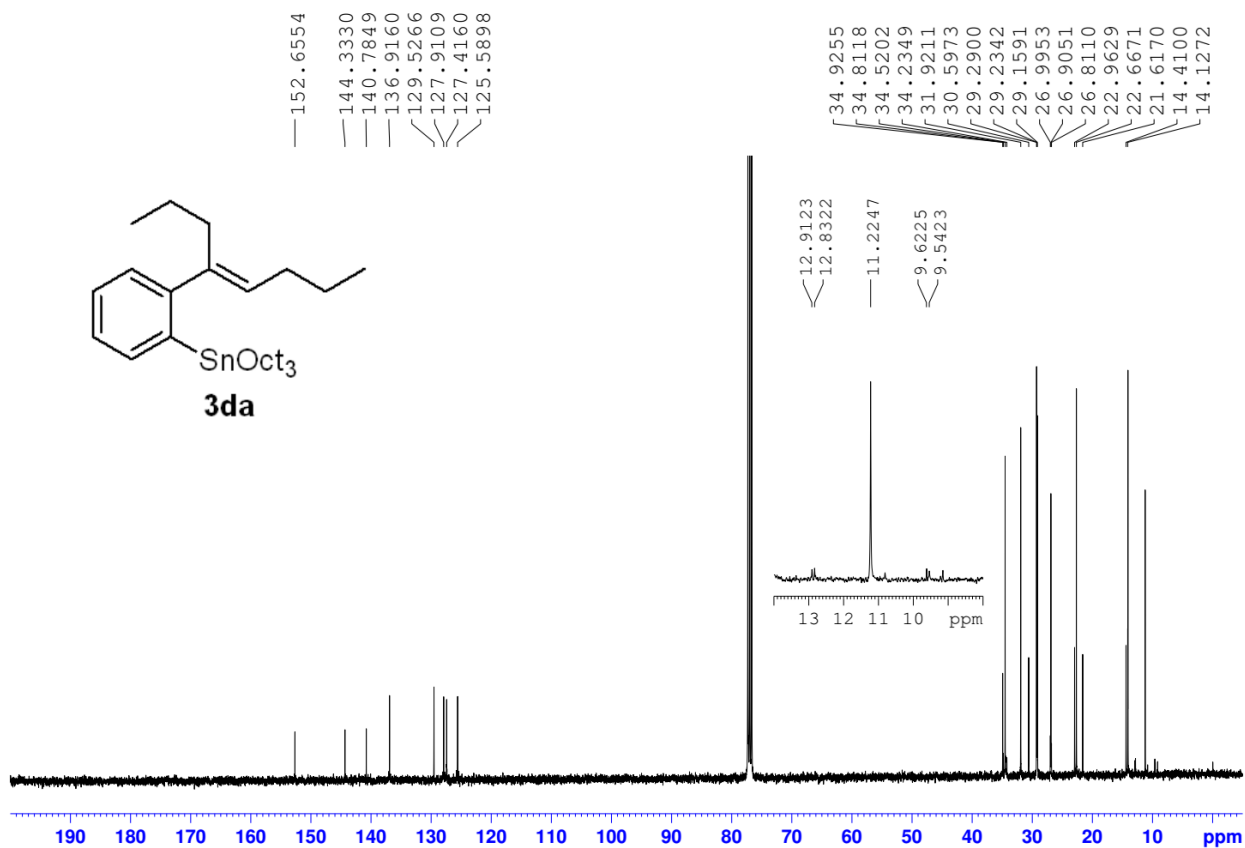

# Electronic Supplementary Information (ESI)

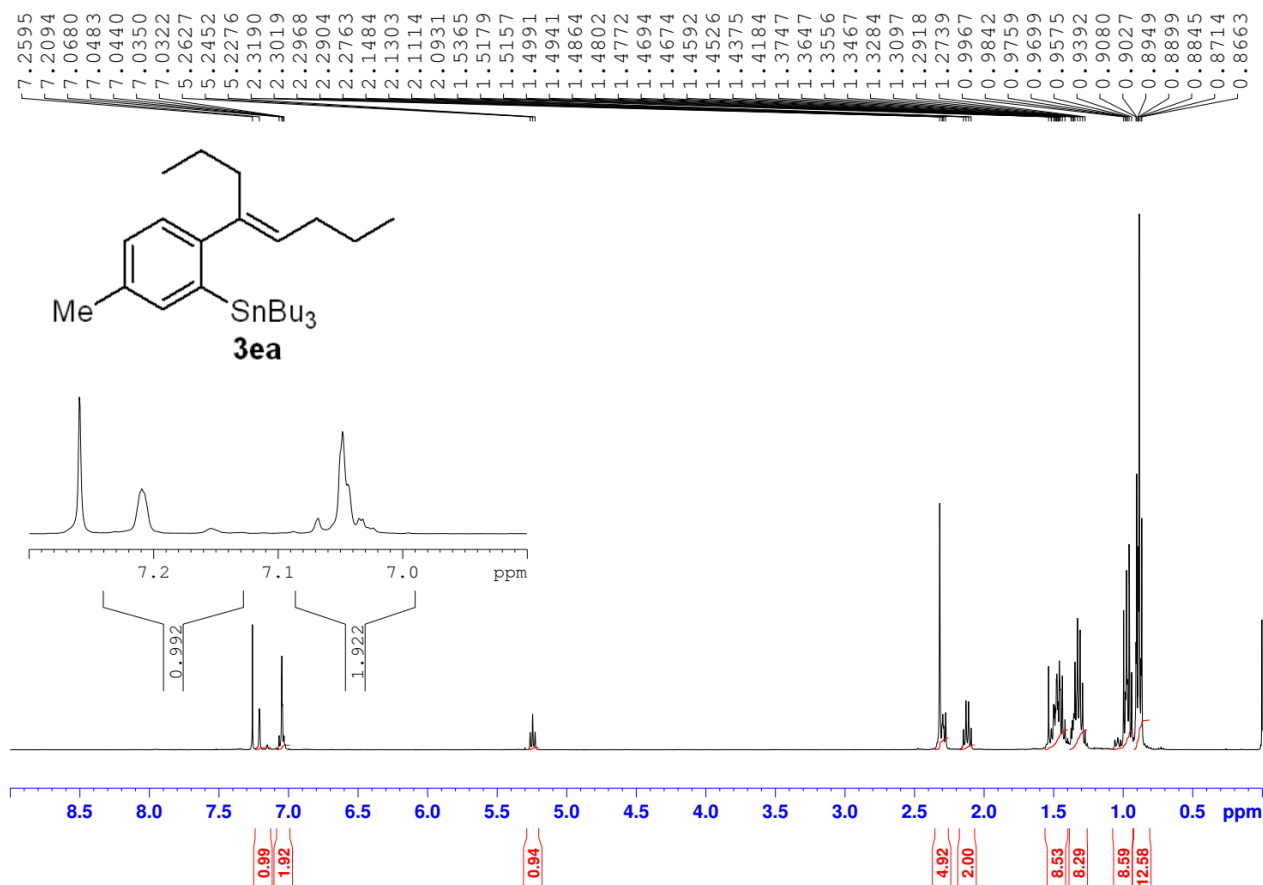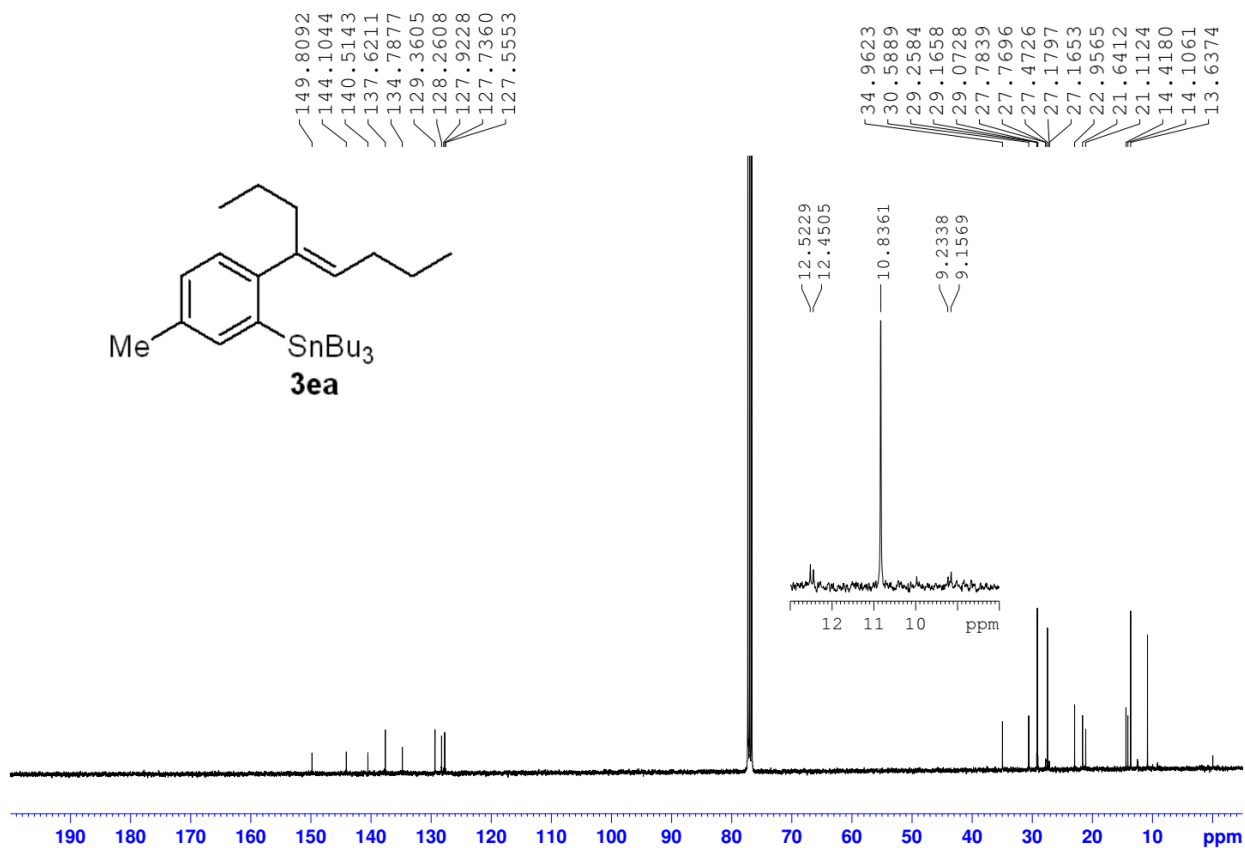

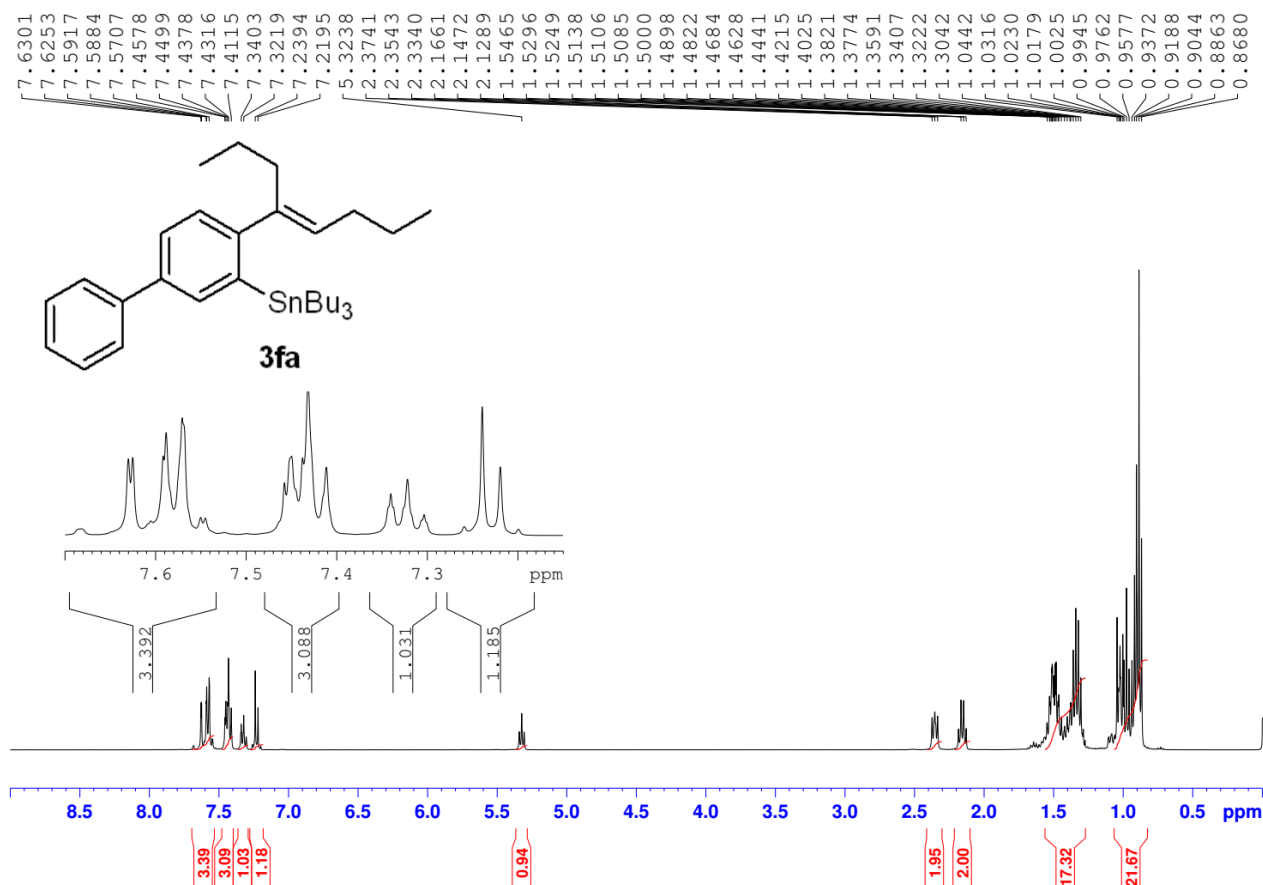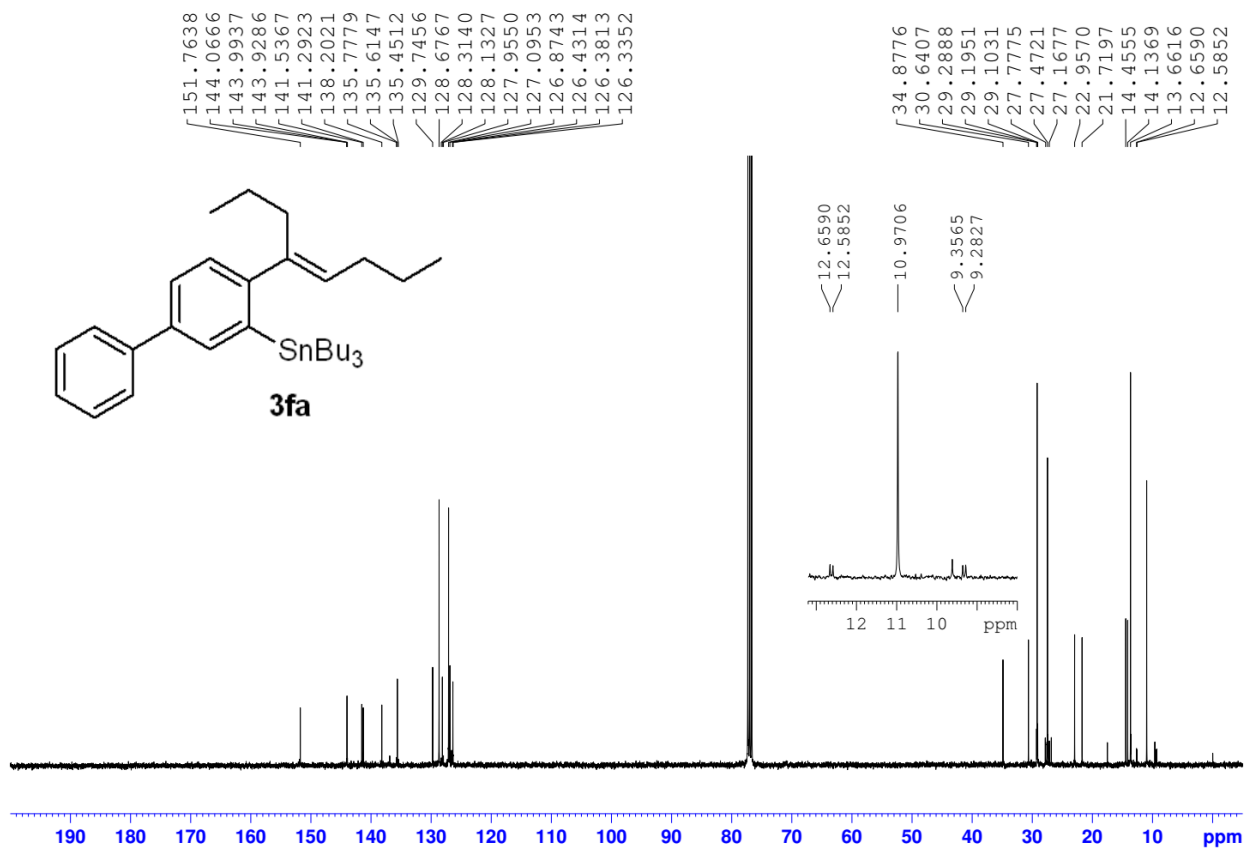

# Electronic Supplementary Information (ESI)

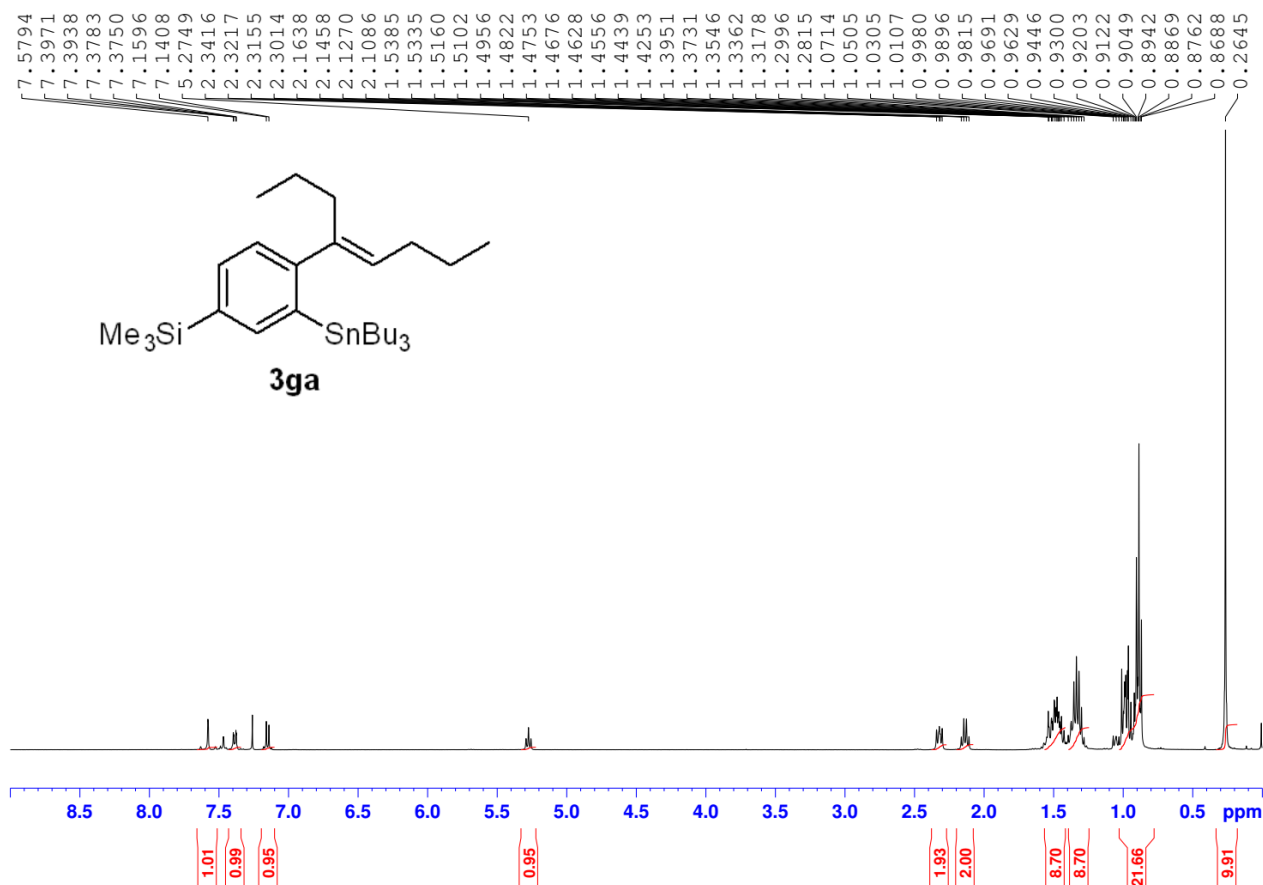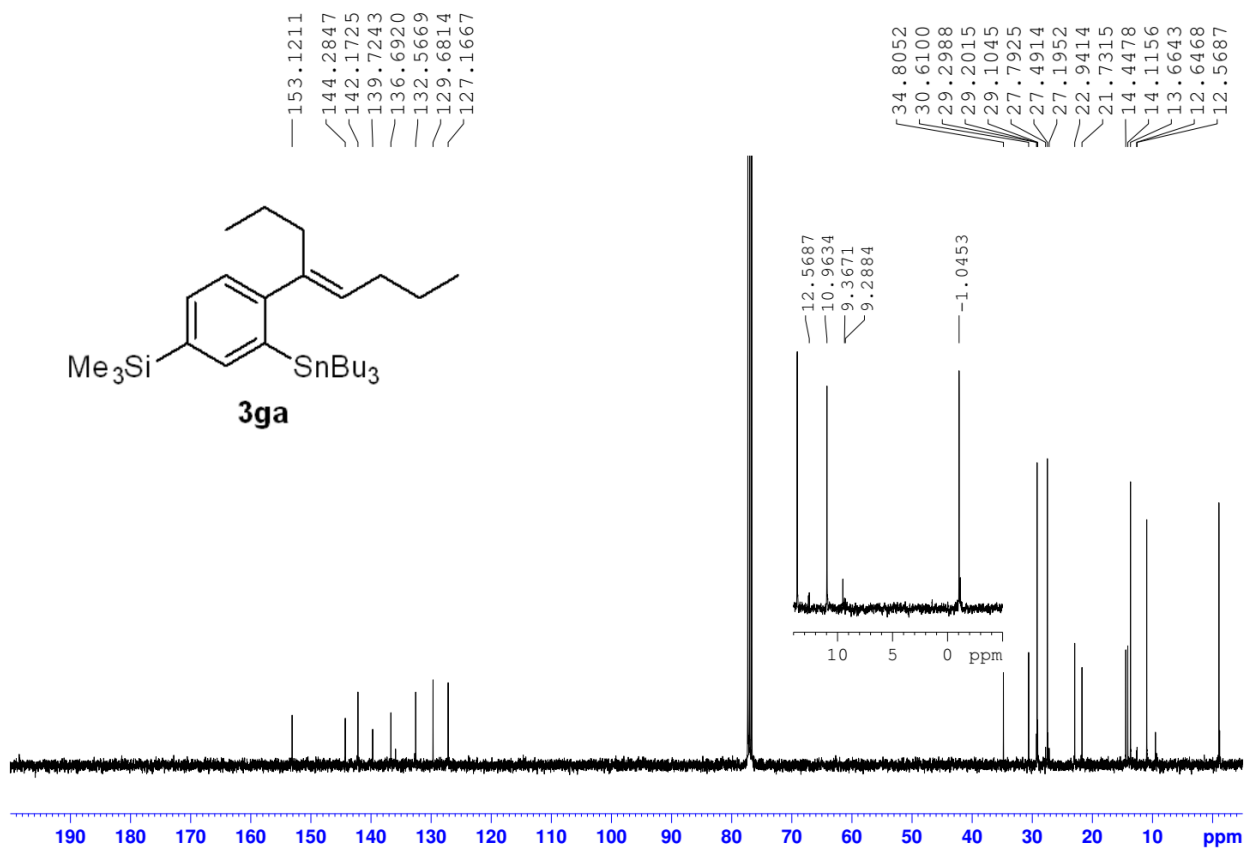

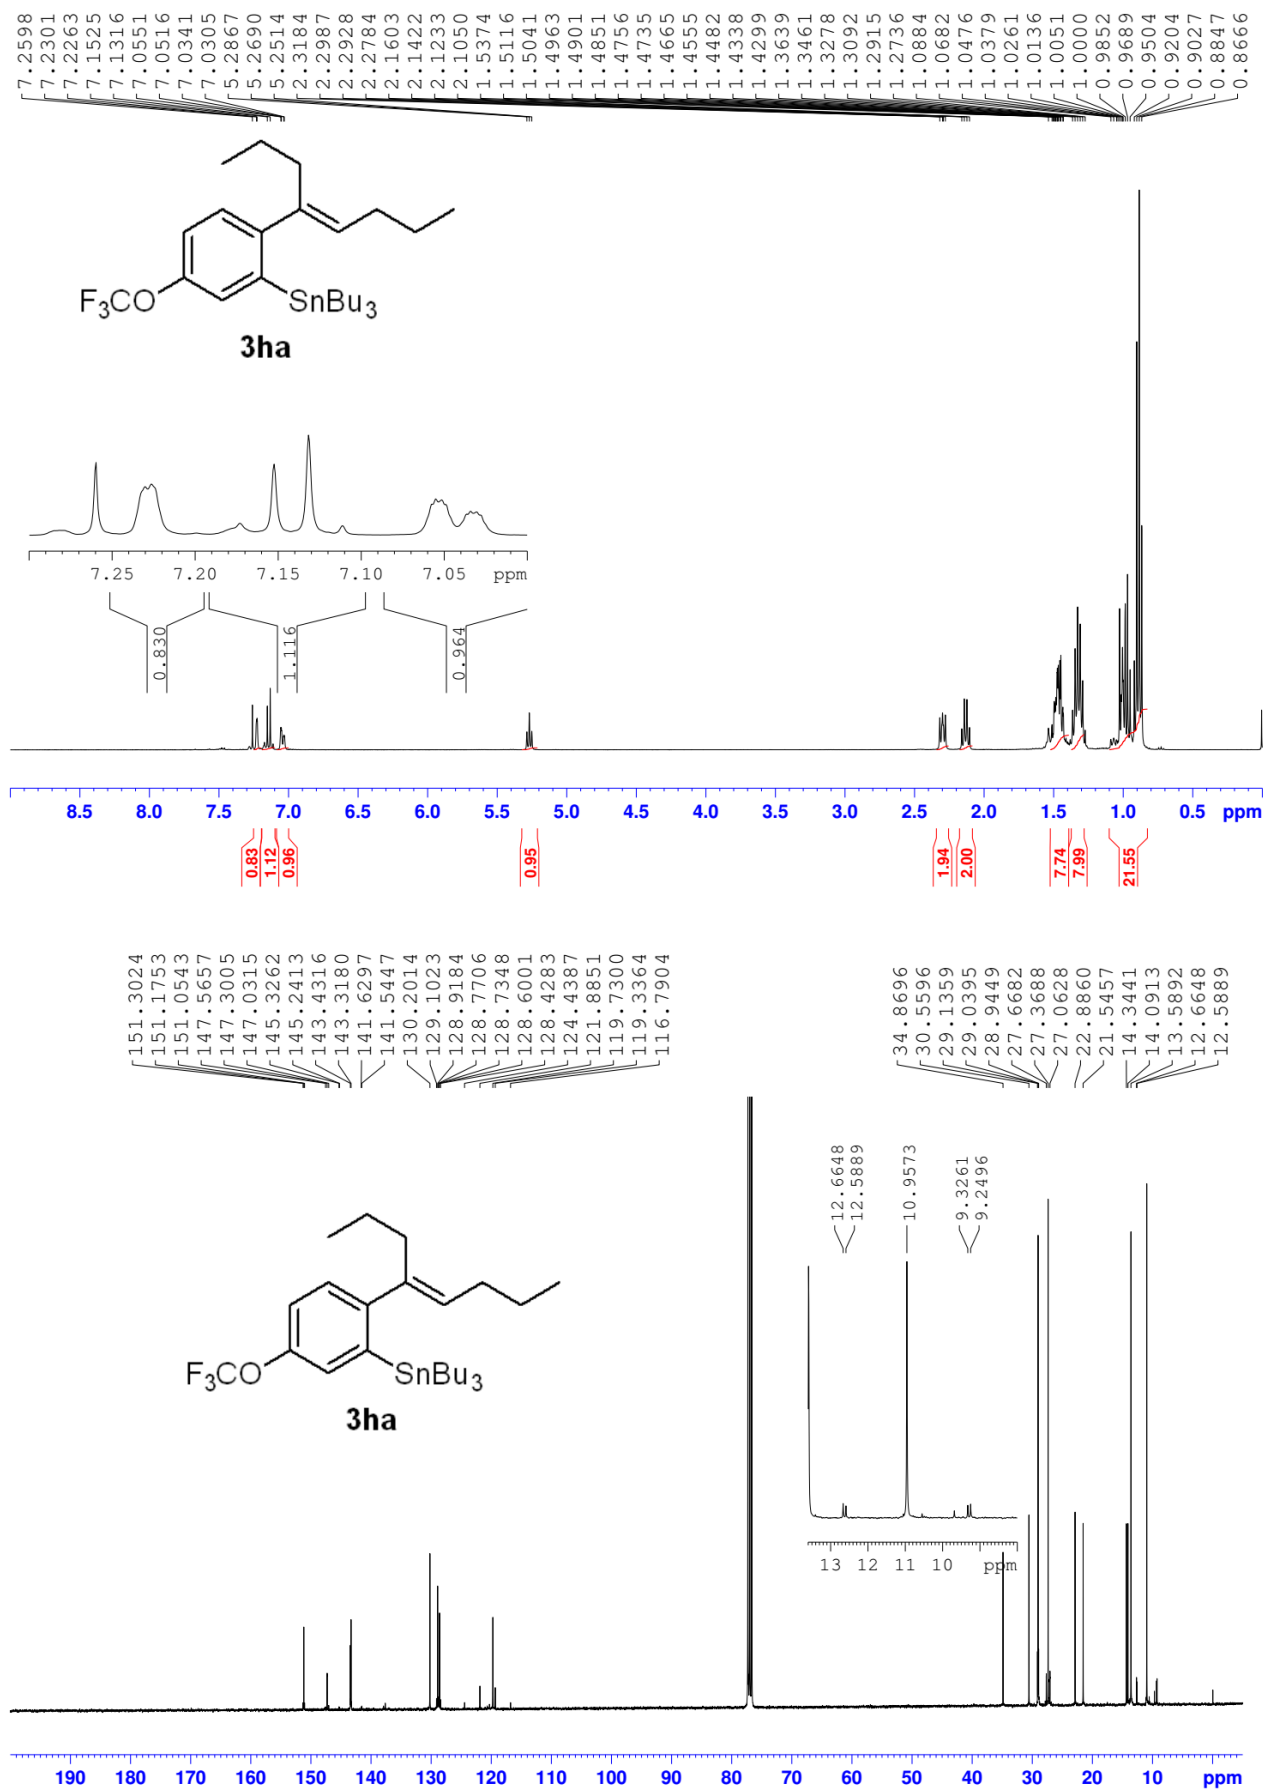

# Electronic Supplementary Information (ESI)

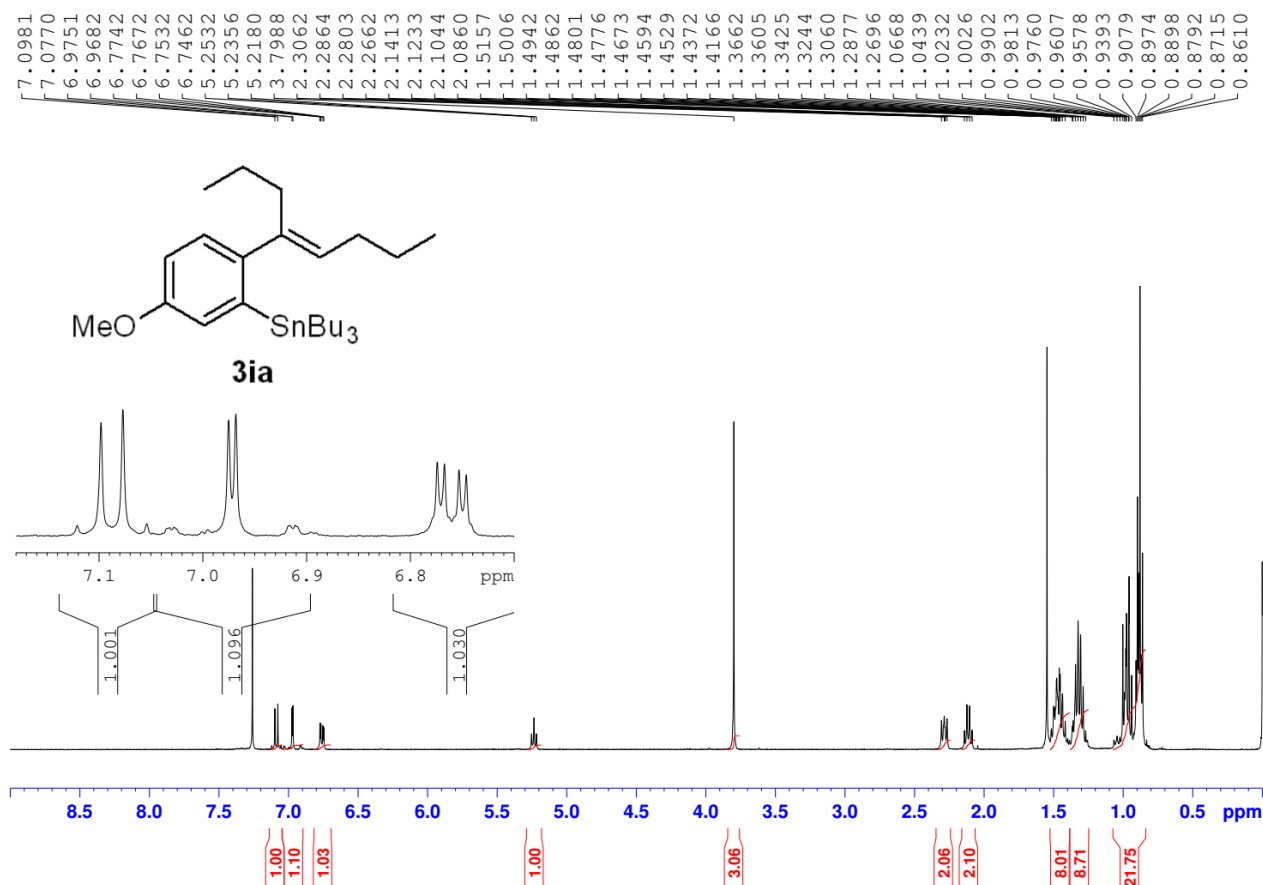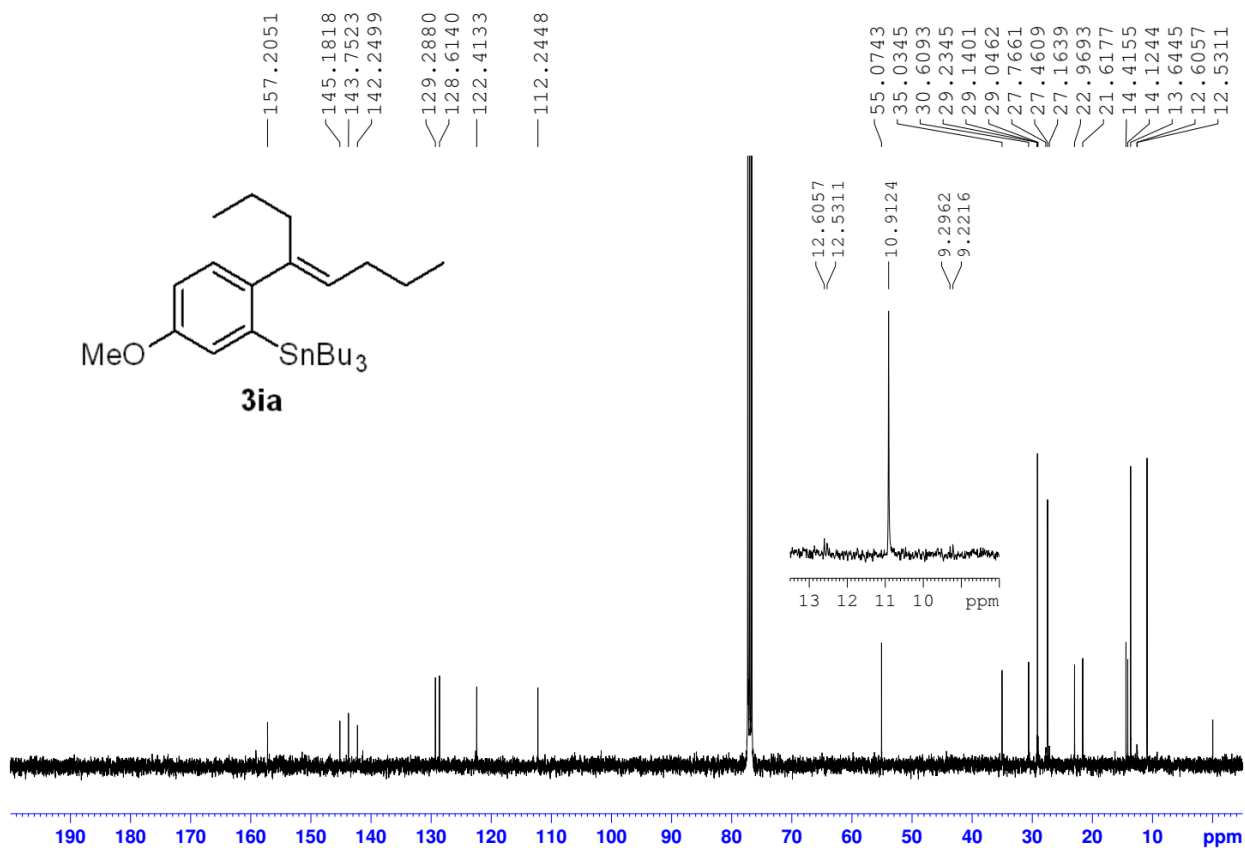

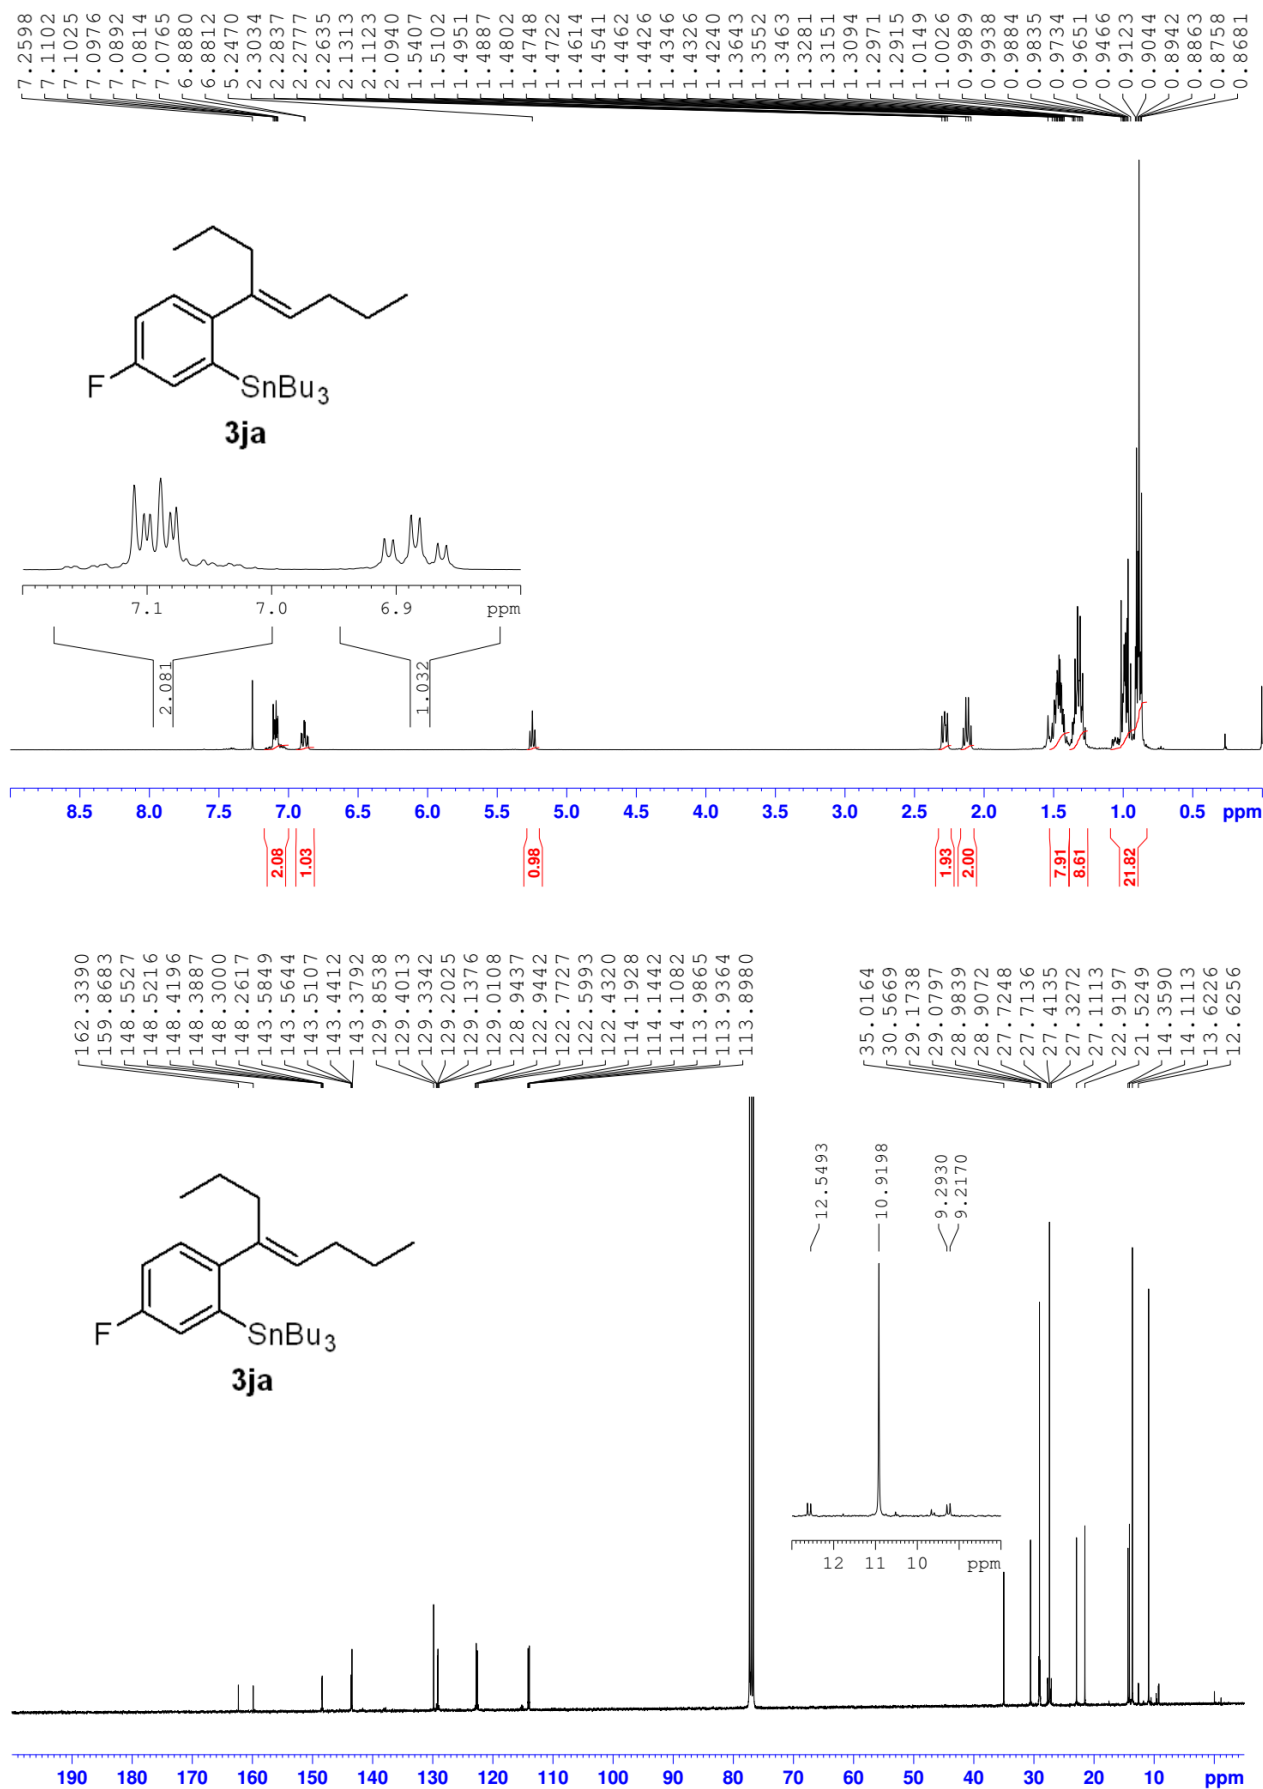



# Electronic Supplementary Information (ESI)

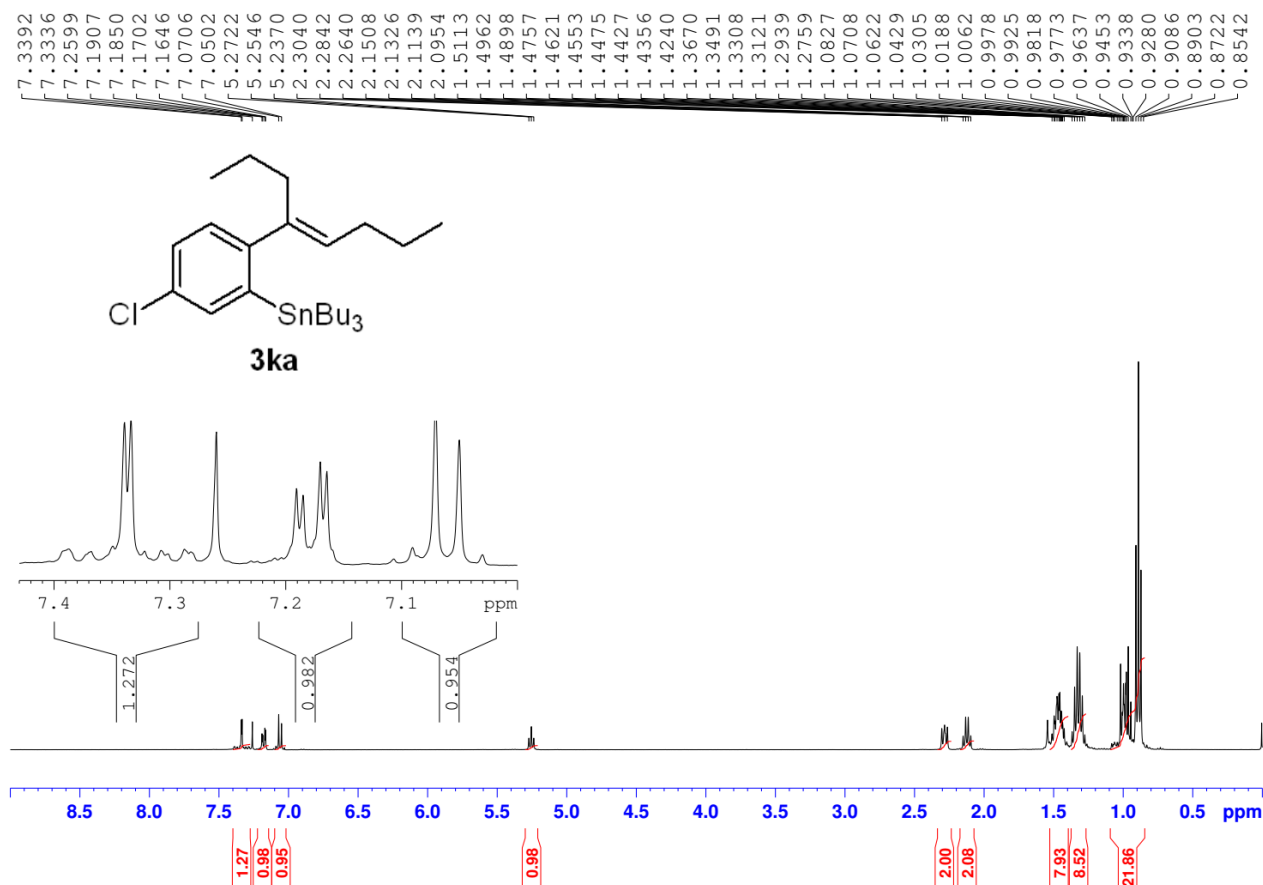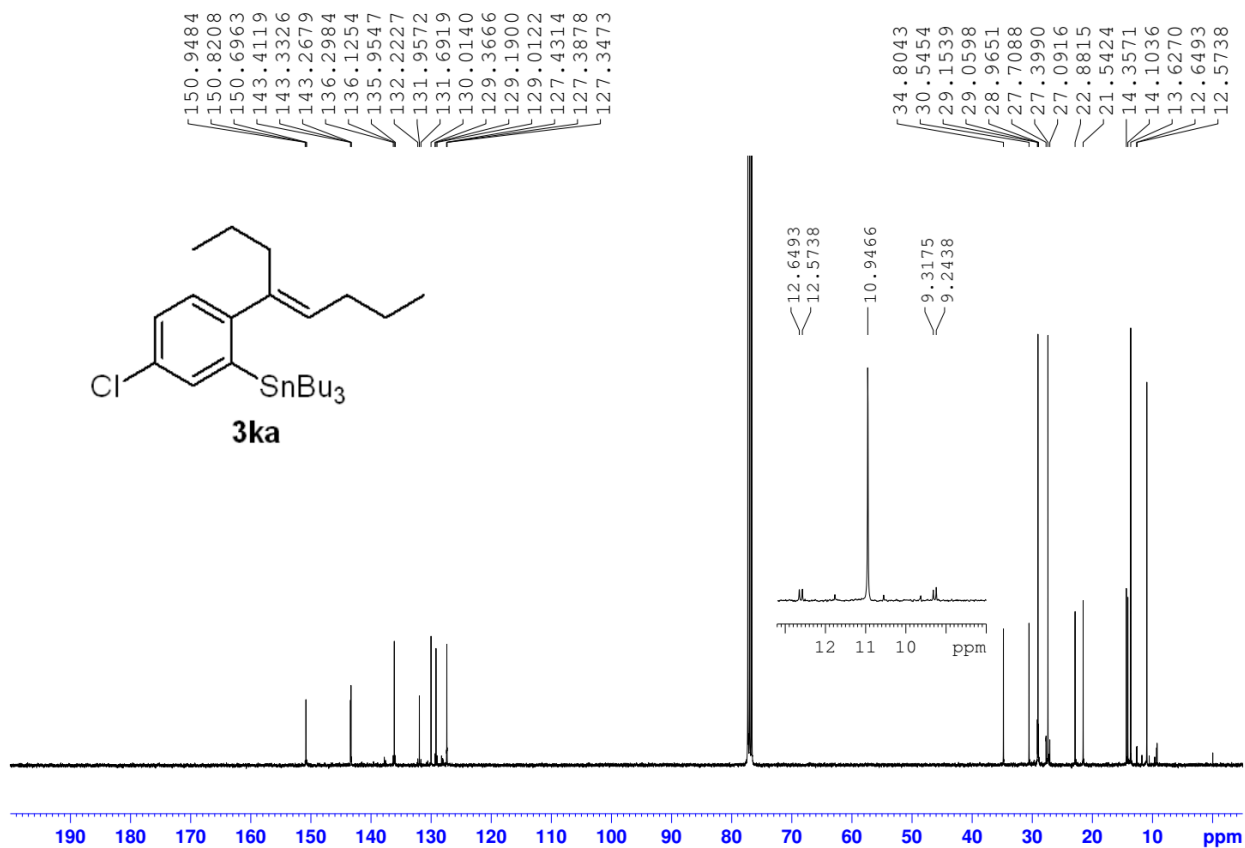

# Electronic Supplementary Information (ESI)

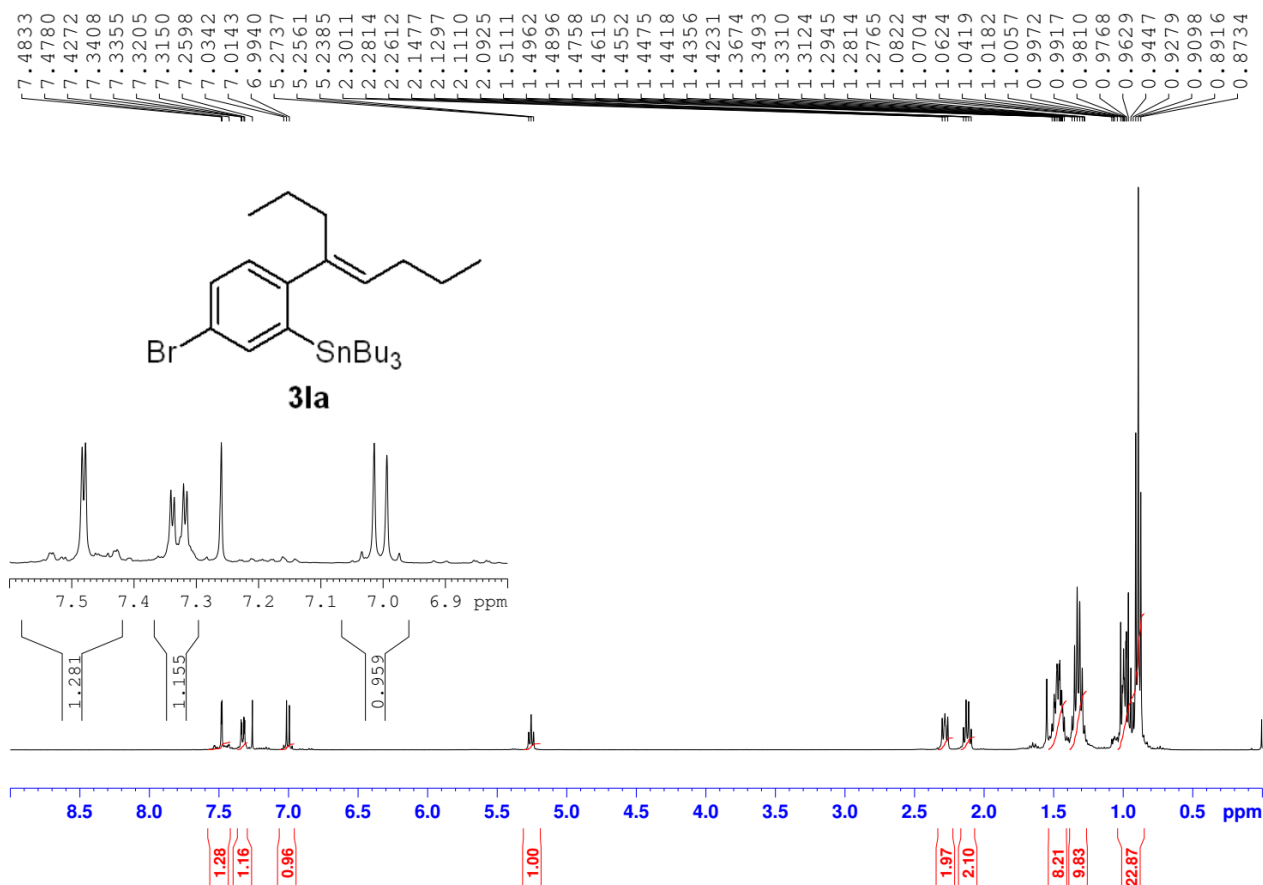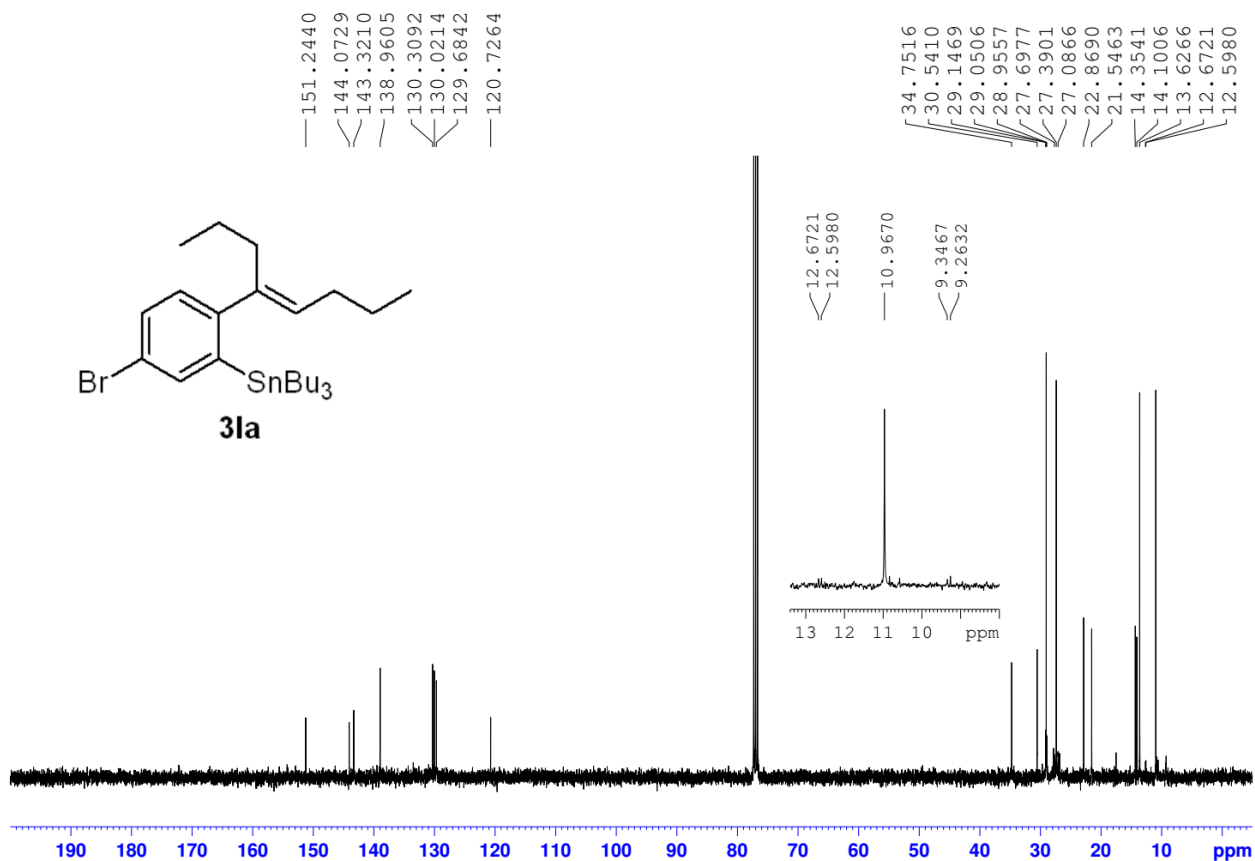

# Electronic Supplementary Information (ESI)

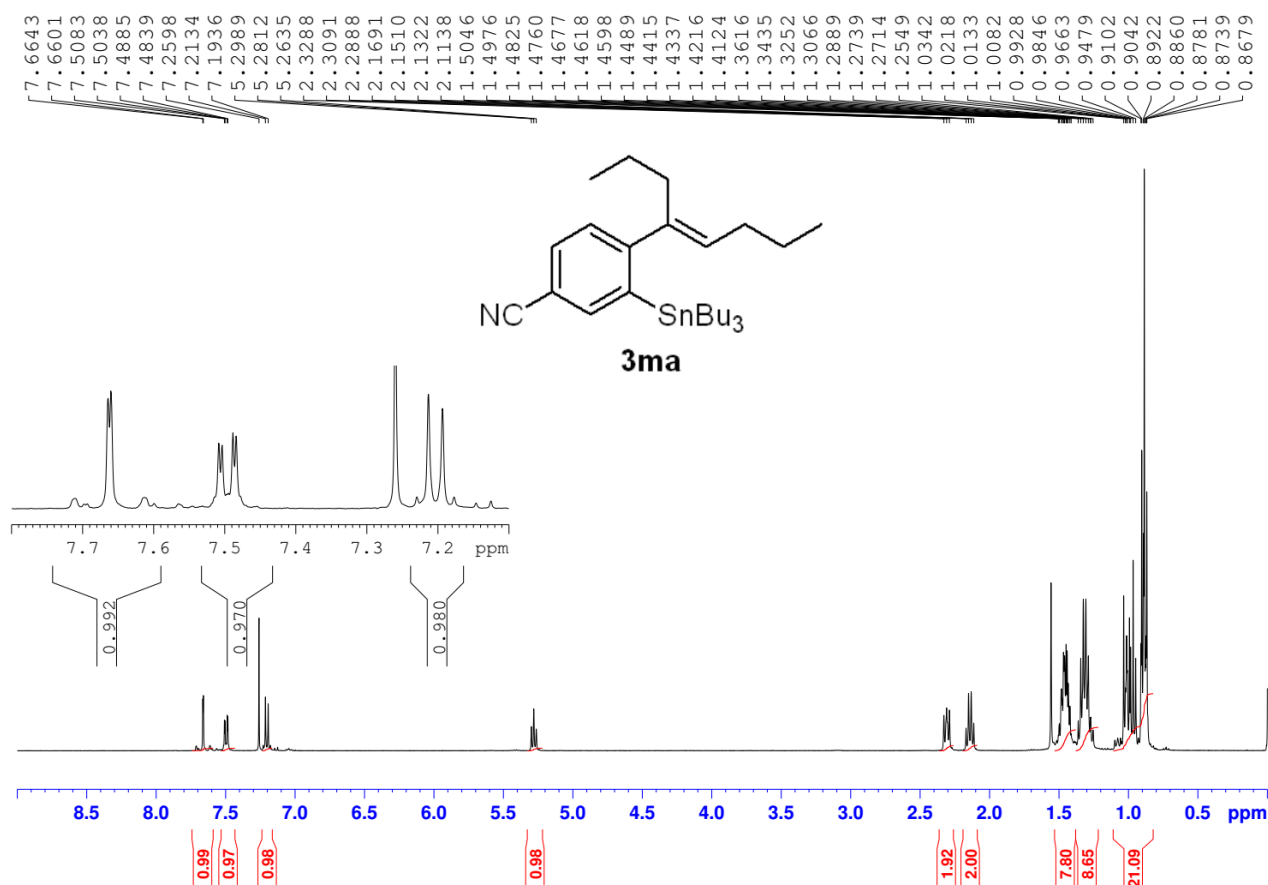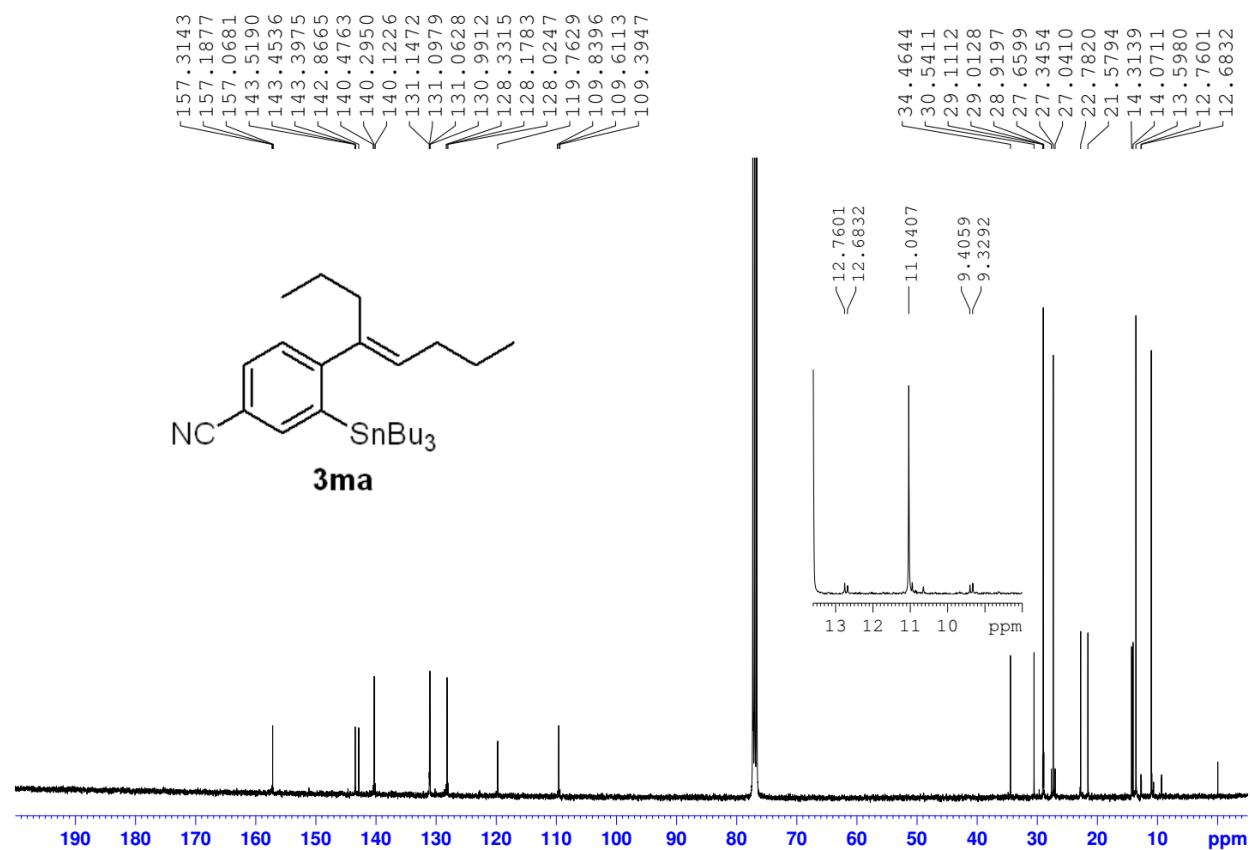

# Electronic Supplementary Information (ESI)

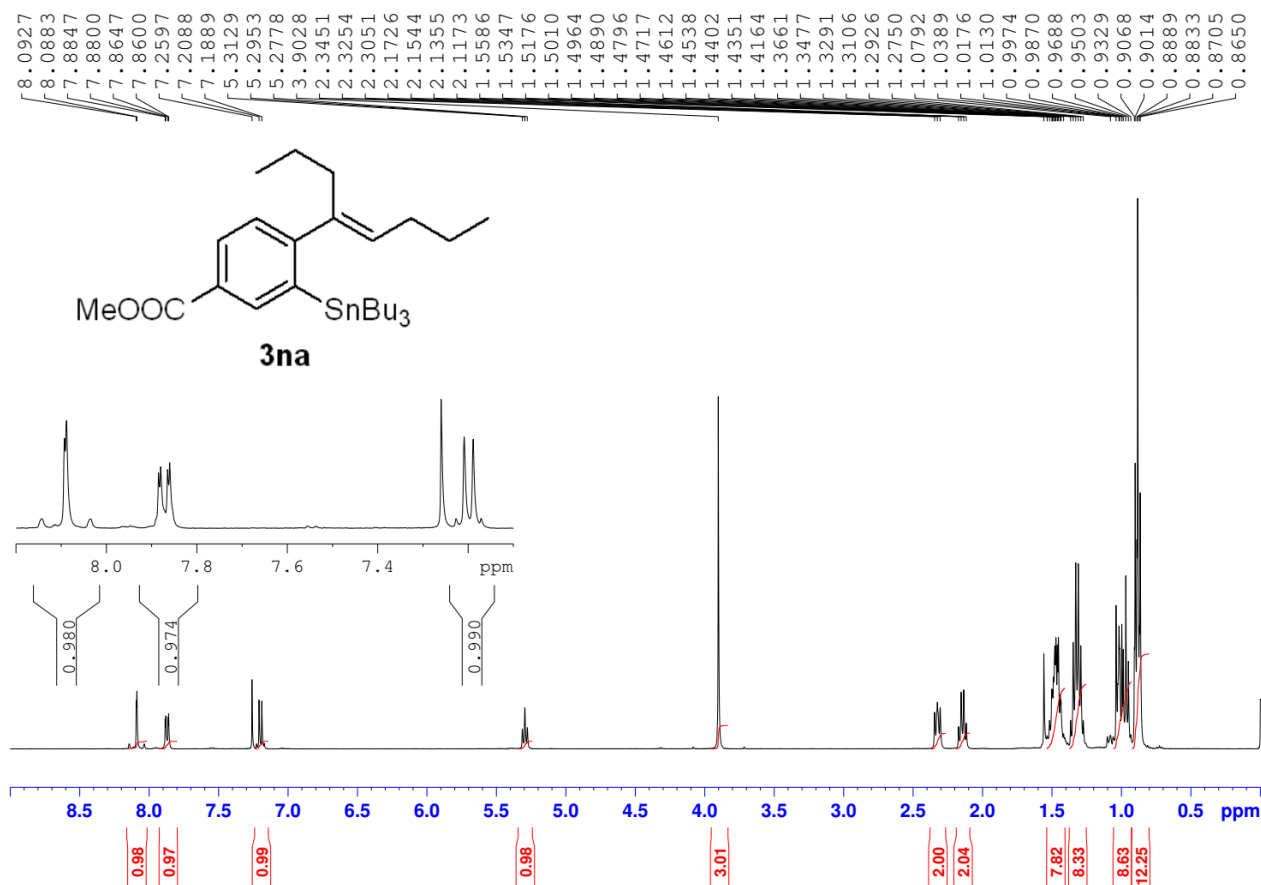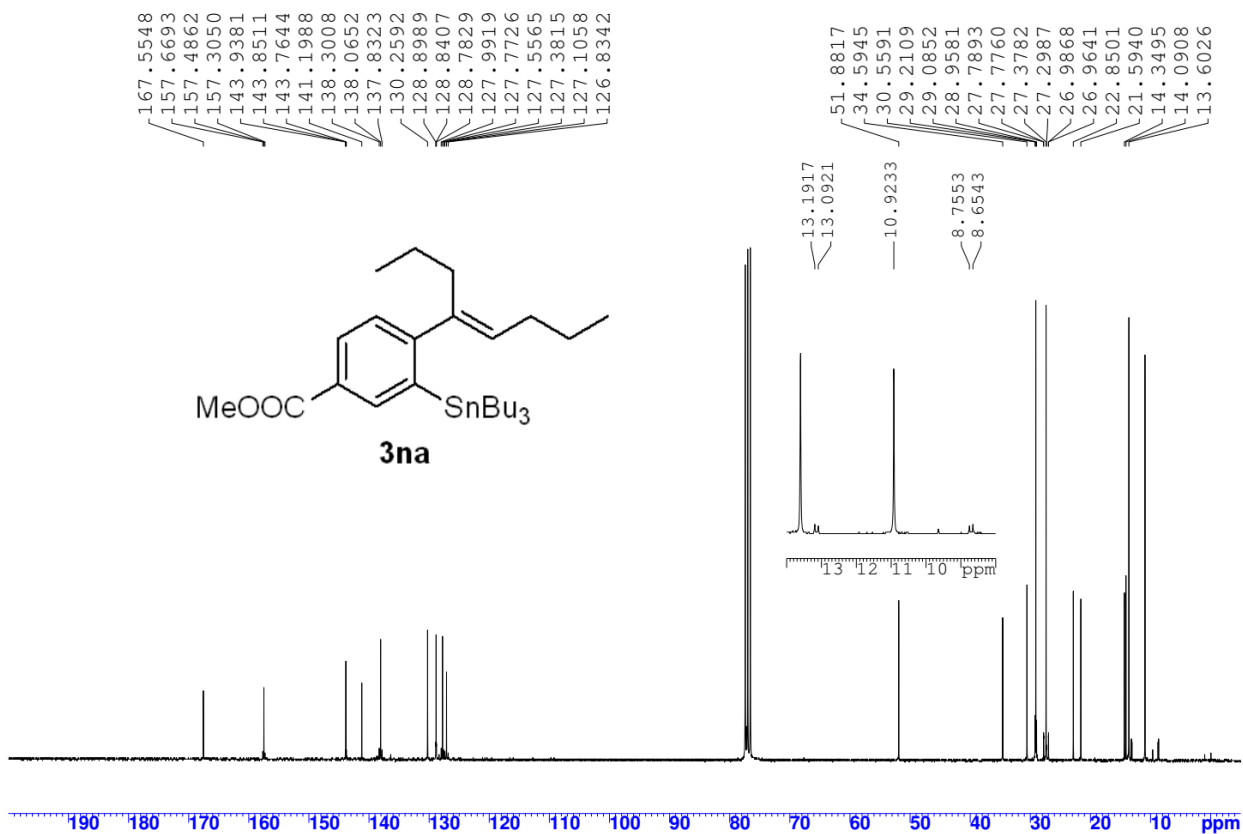

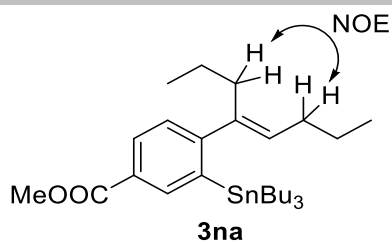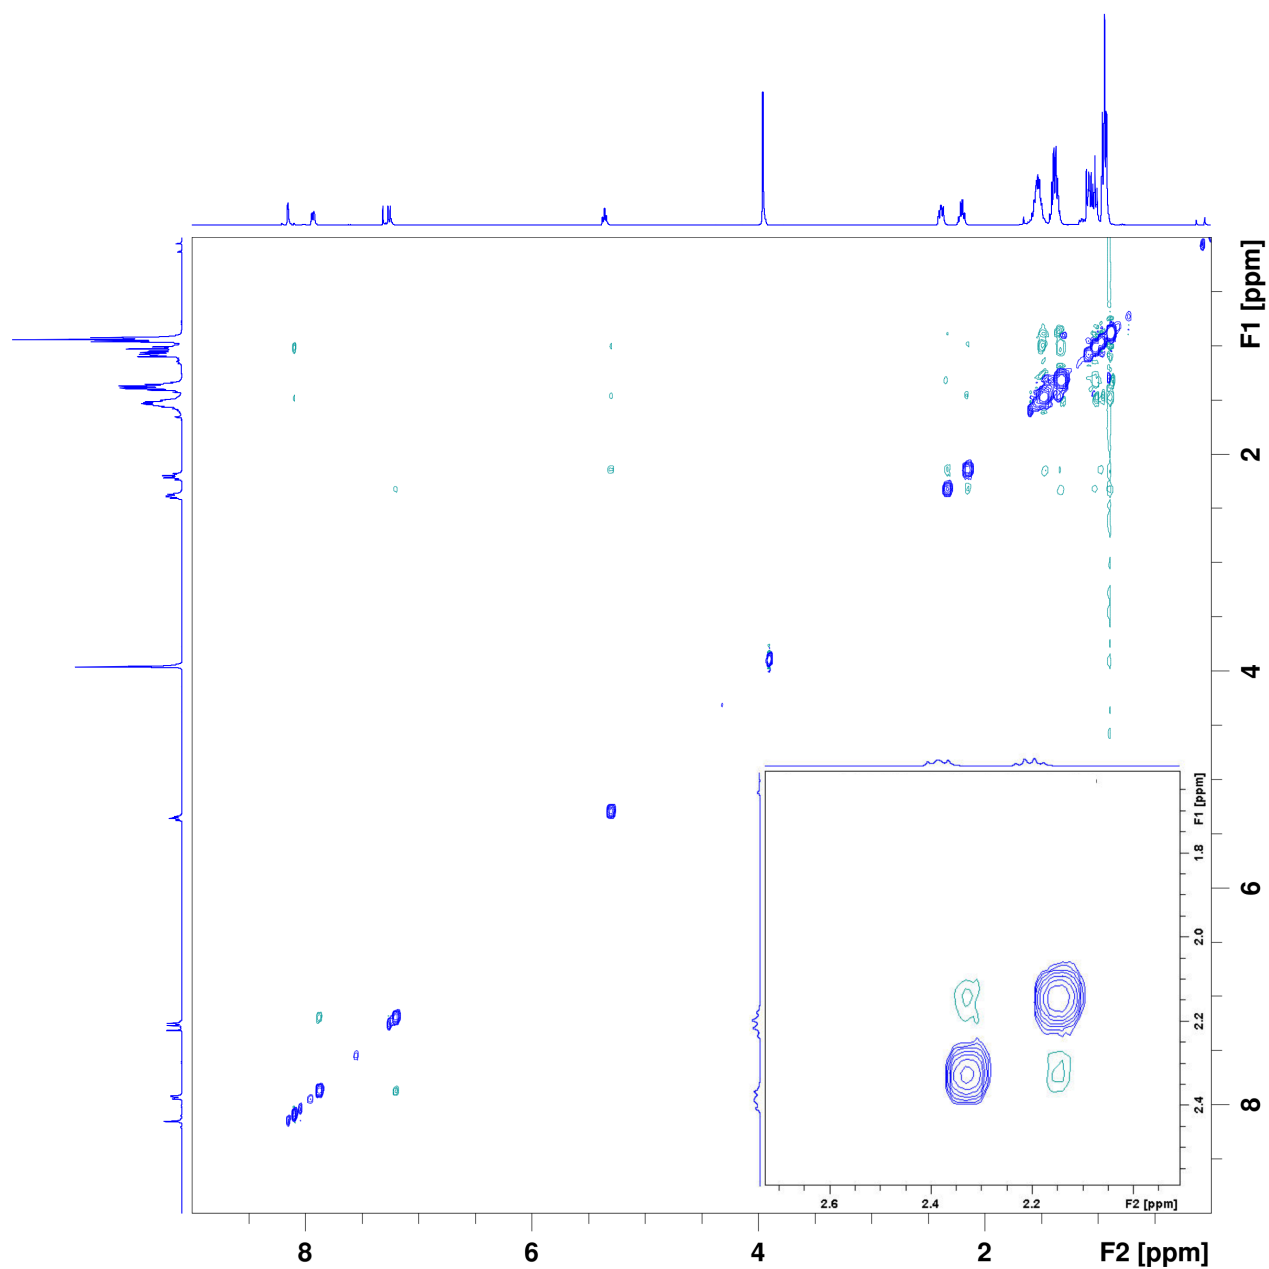

# Electronic Supplementary Information (ESI)

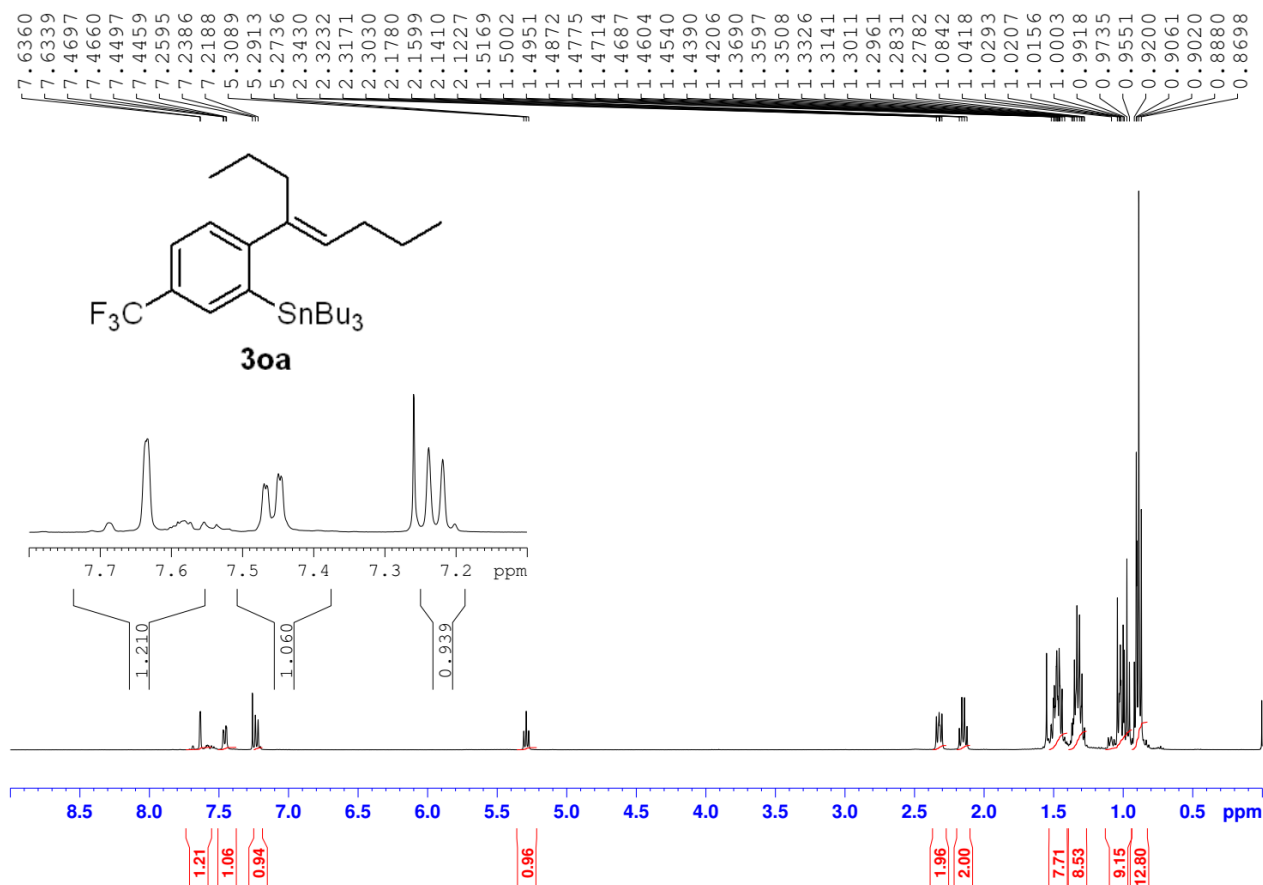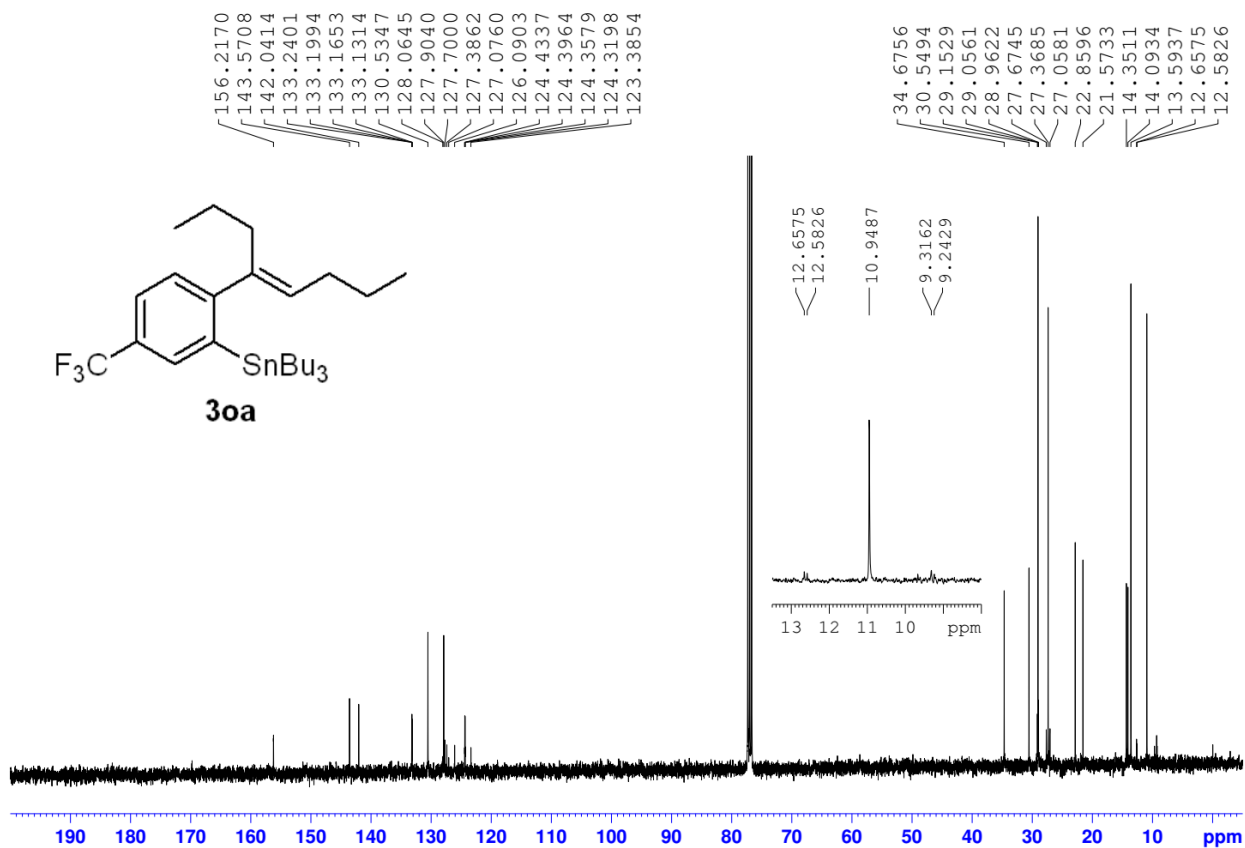

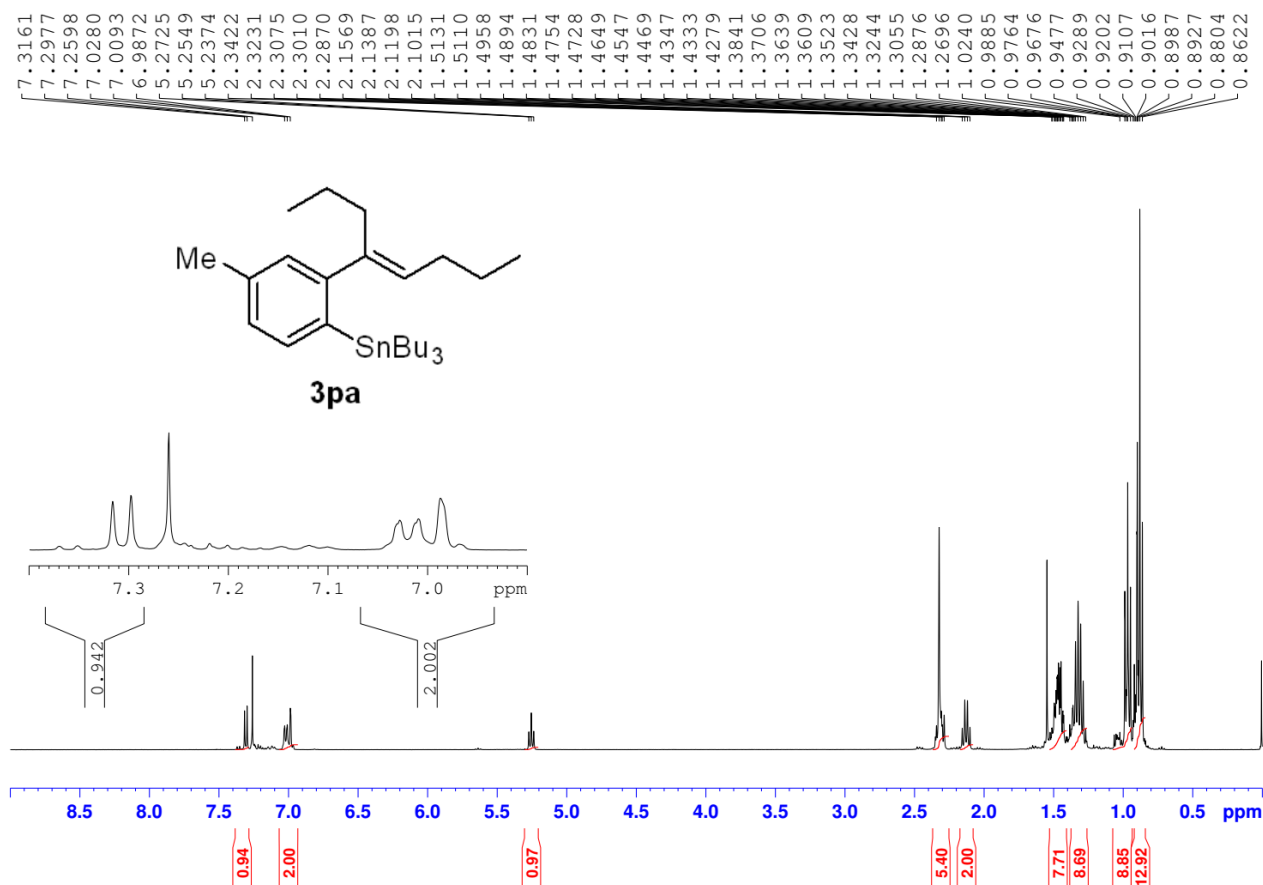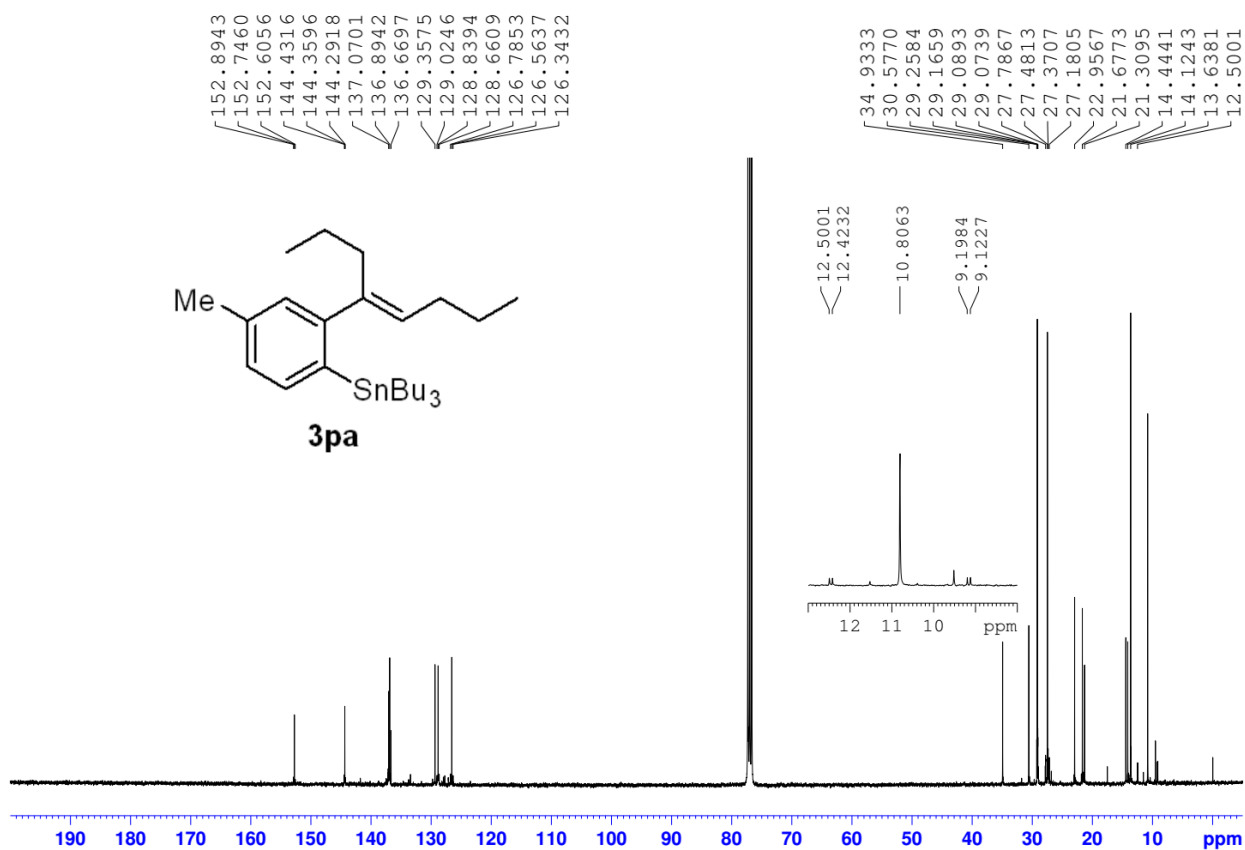

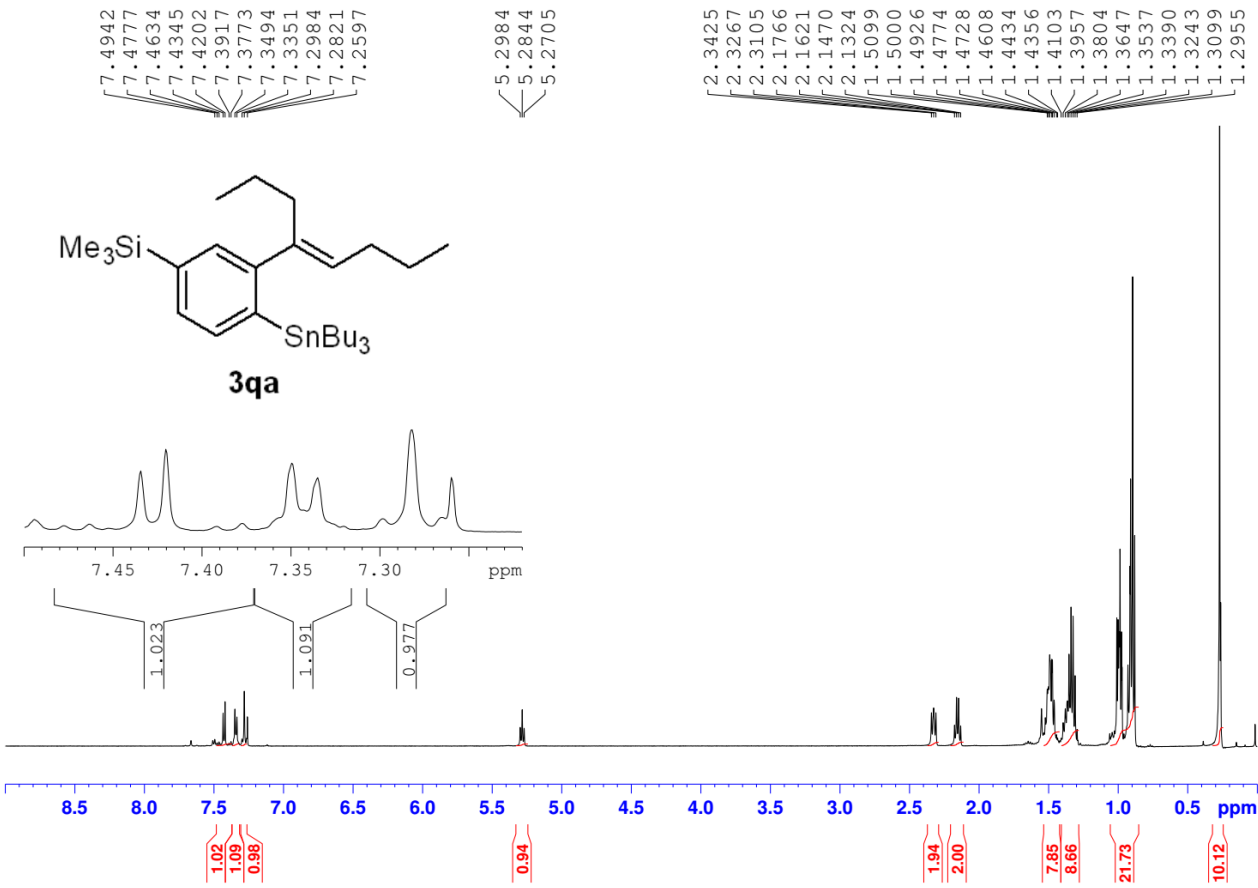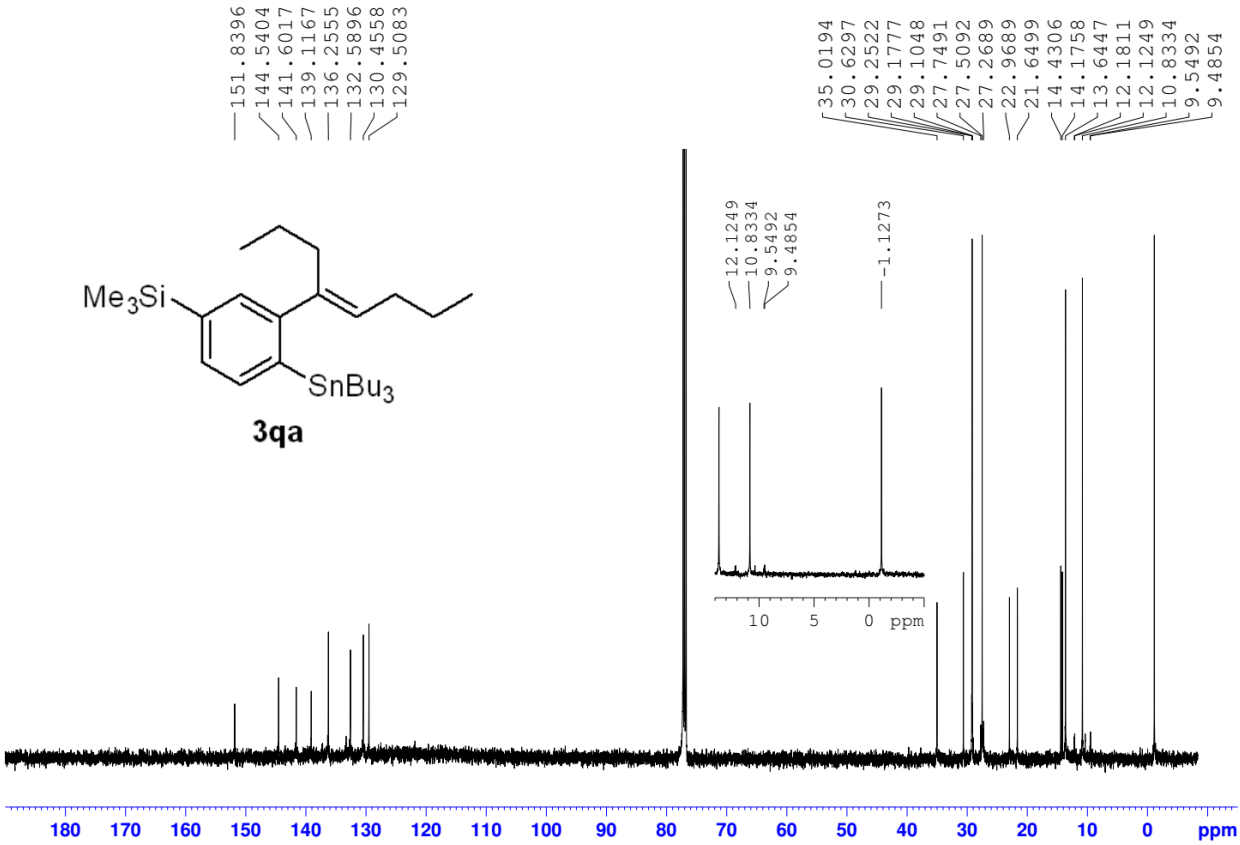



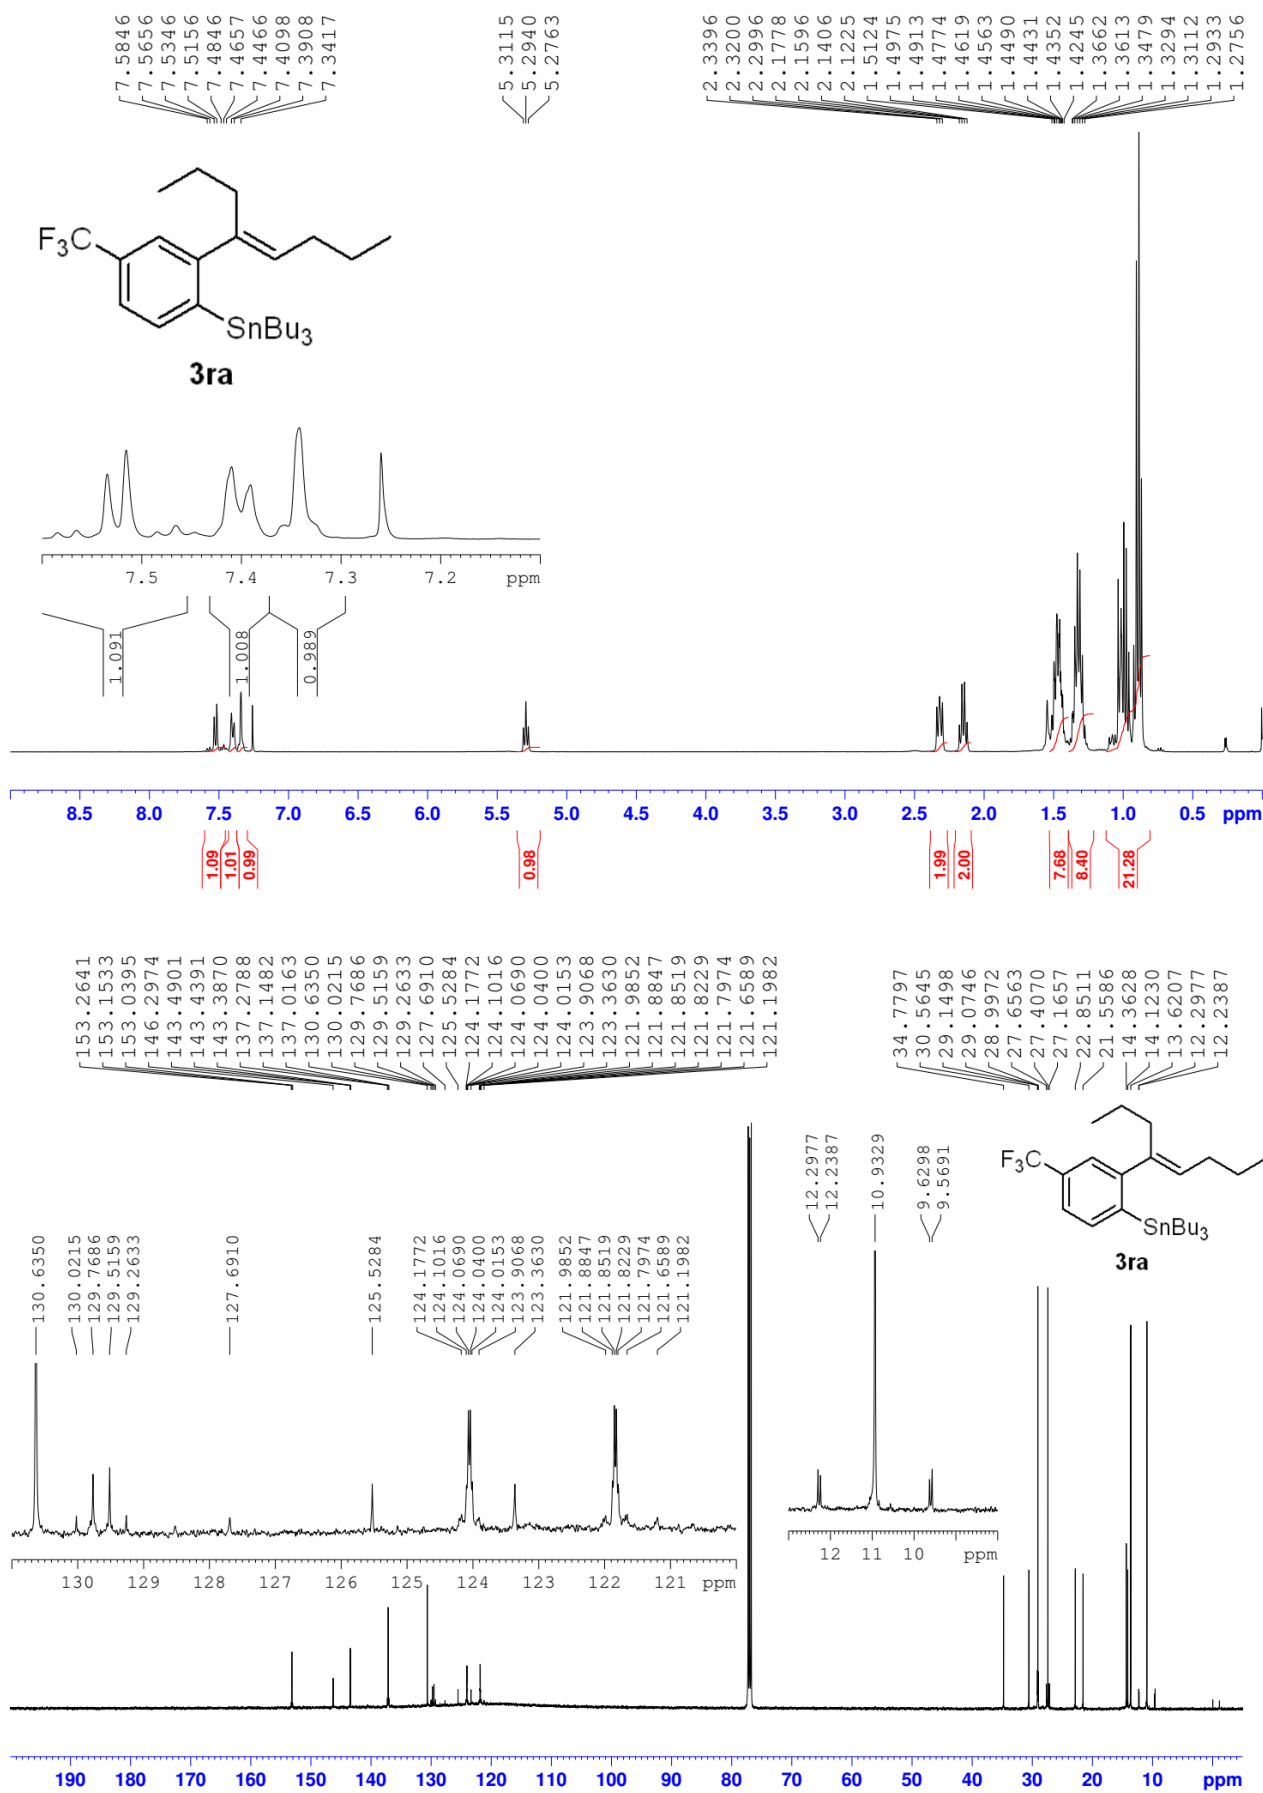

# Electronic Supplementary Information (ESI)

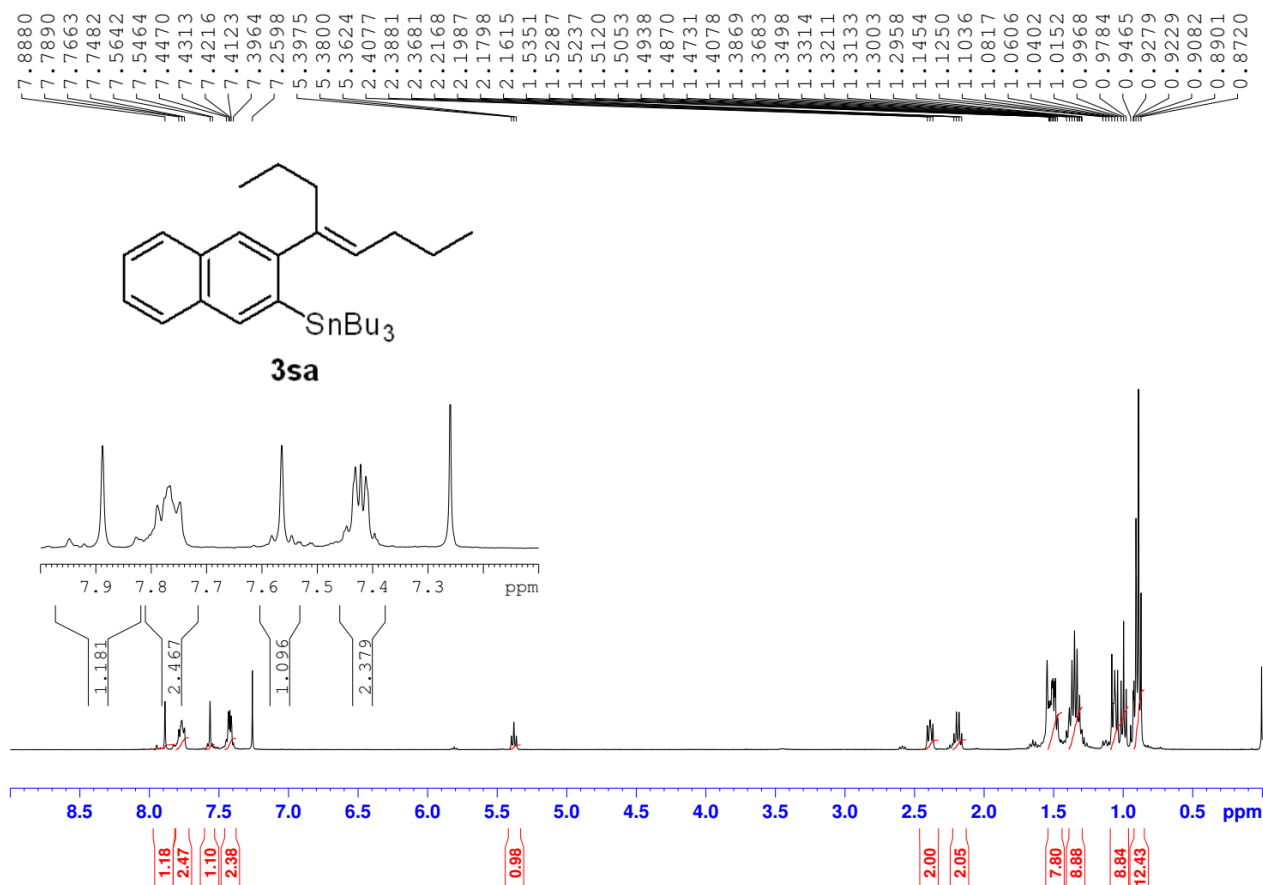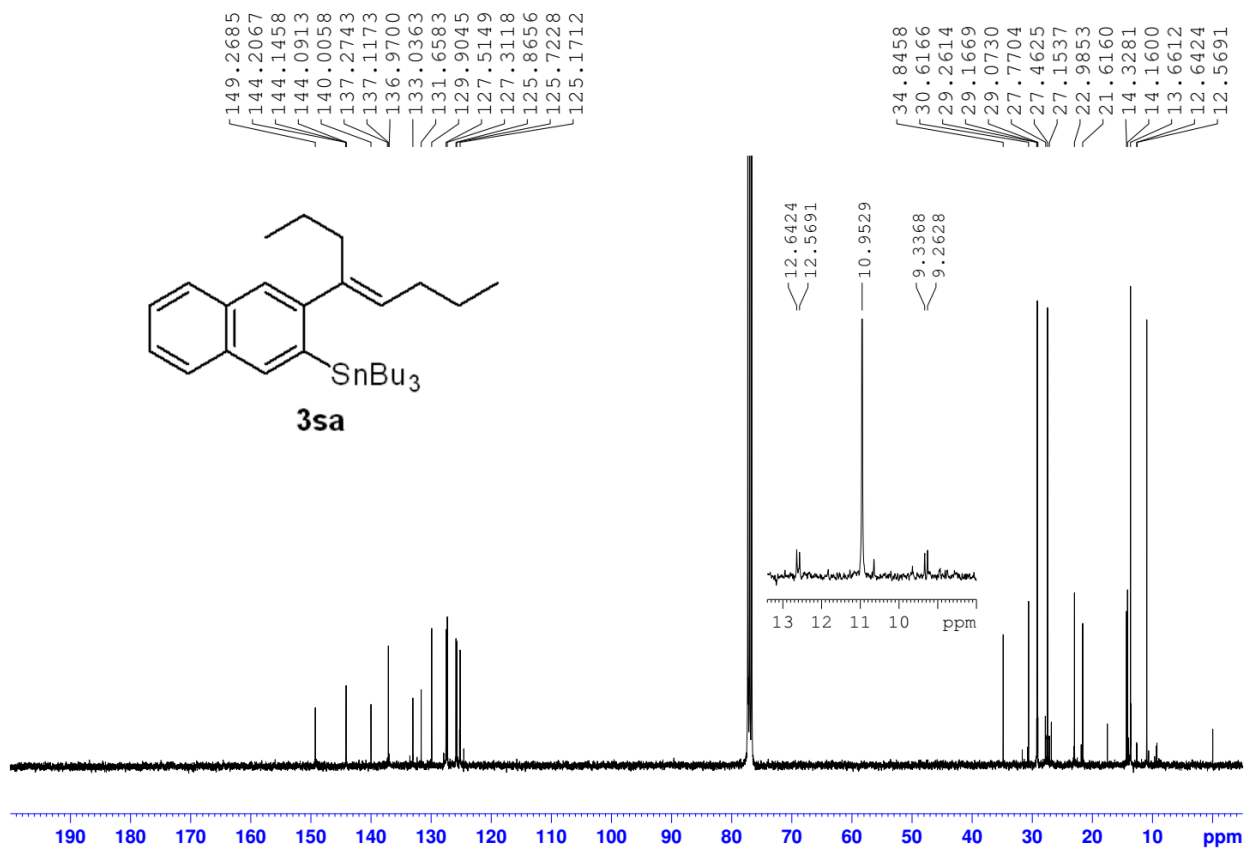

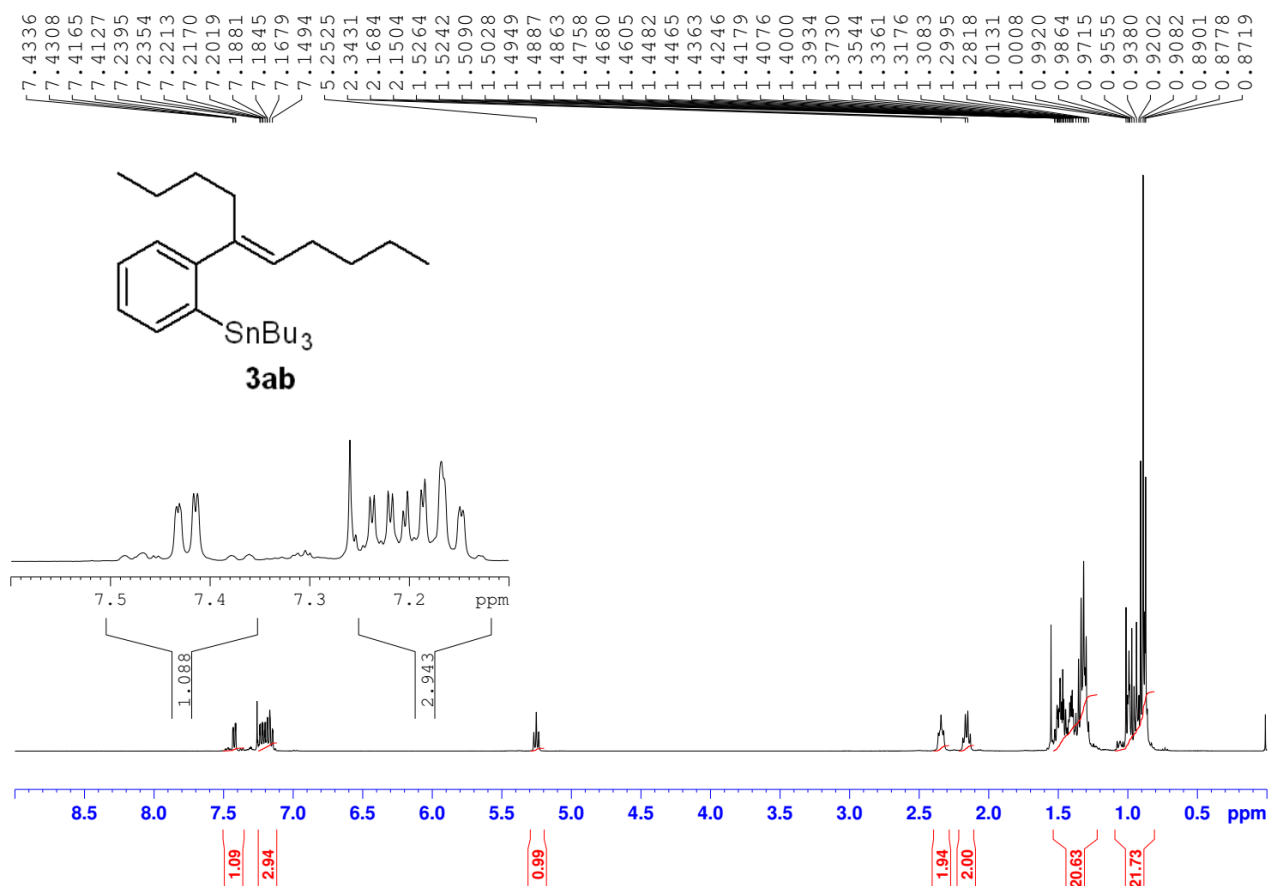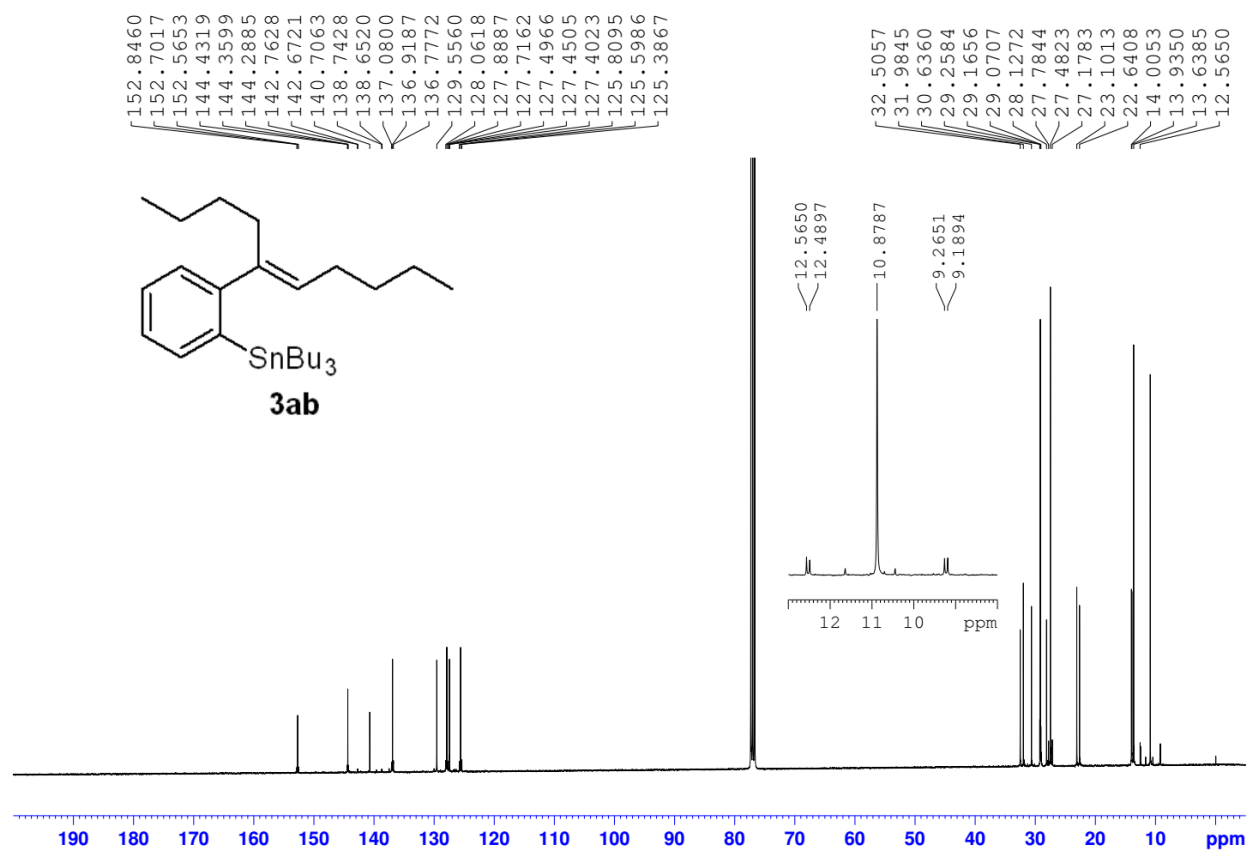

# Electronic Supplementary Information (ESI)

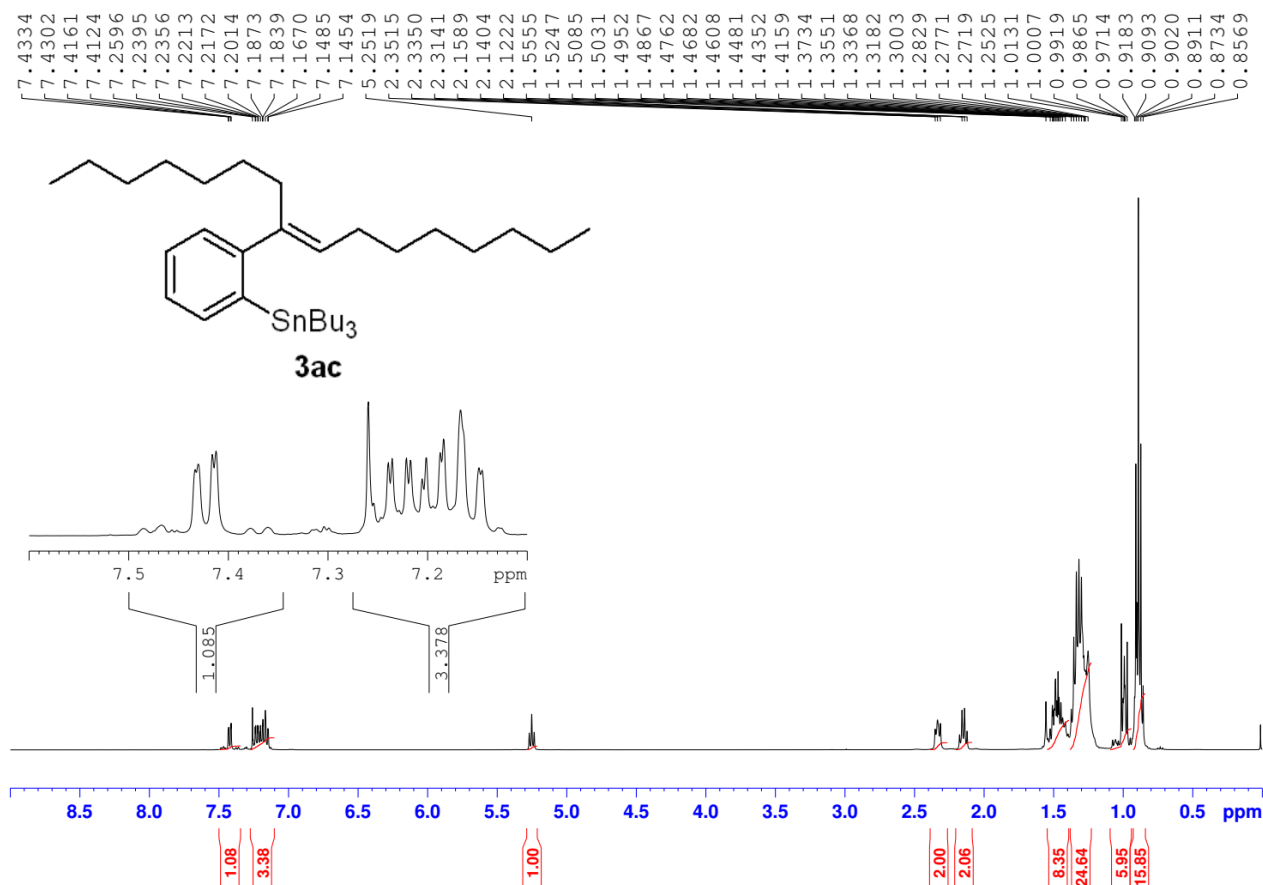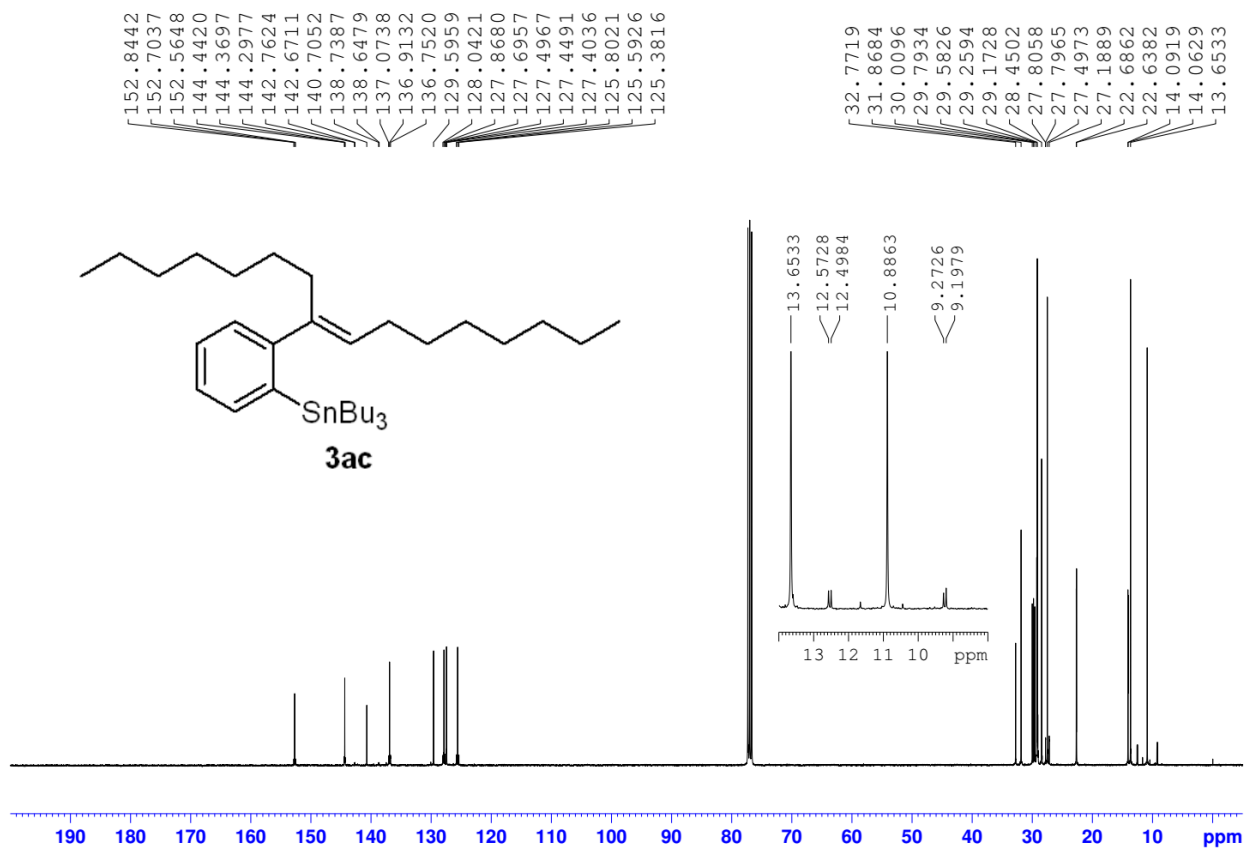

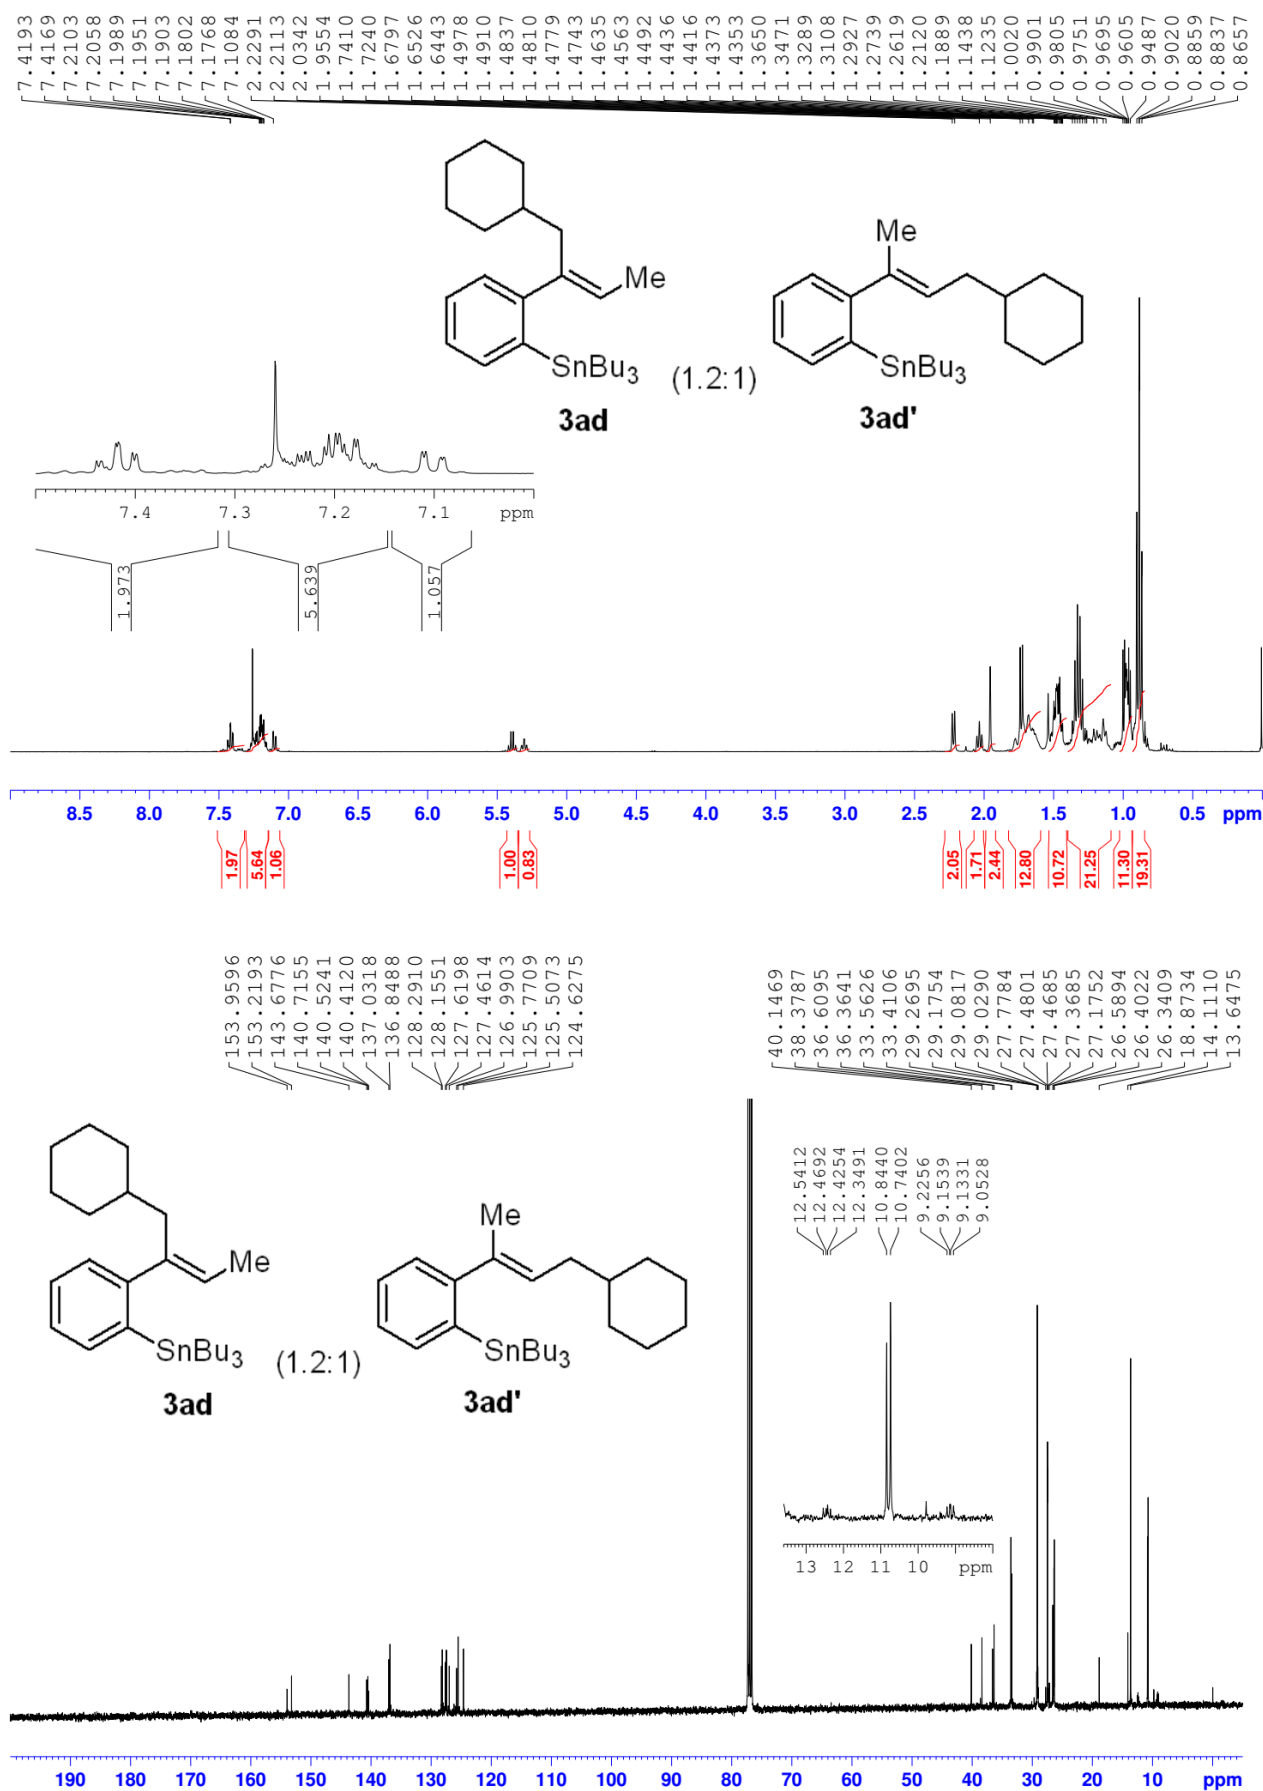

# Electronic Supplementary Information (ESI)

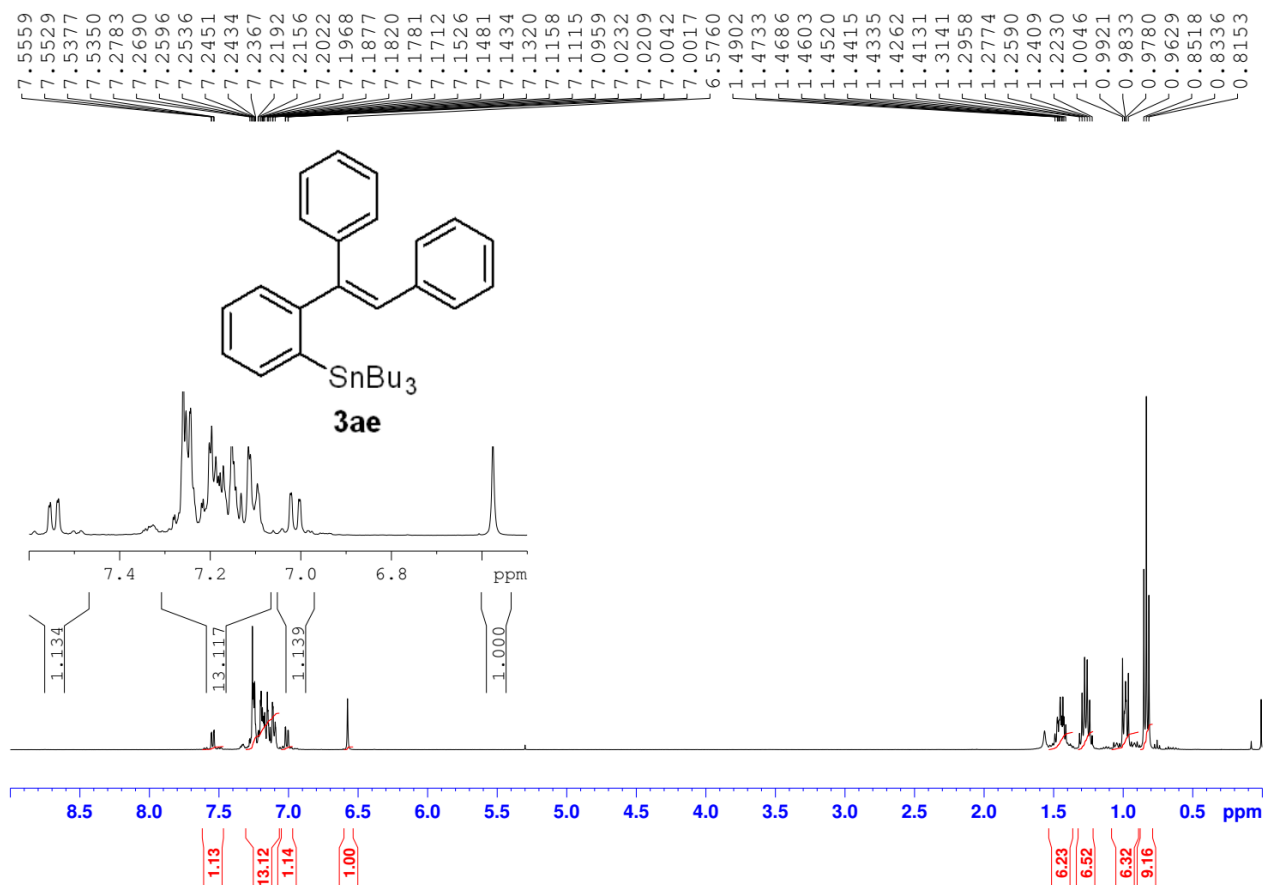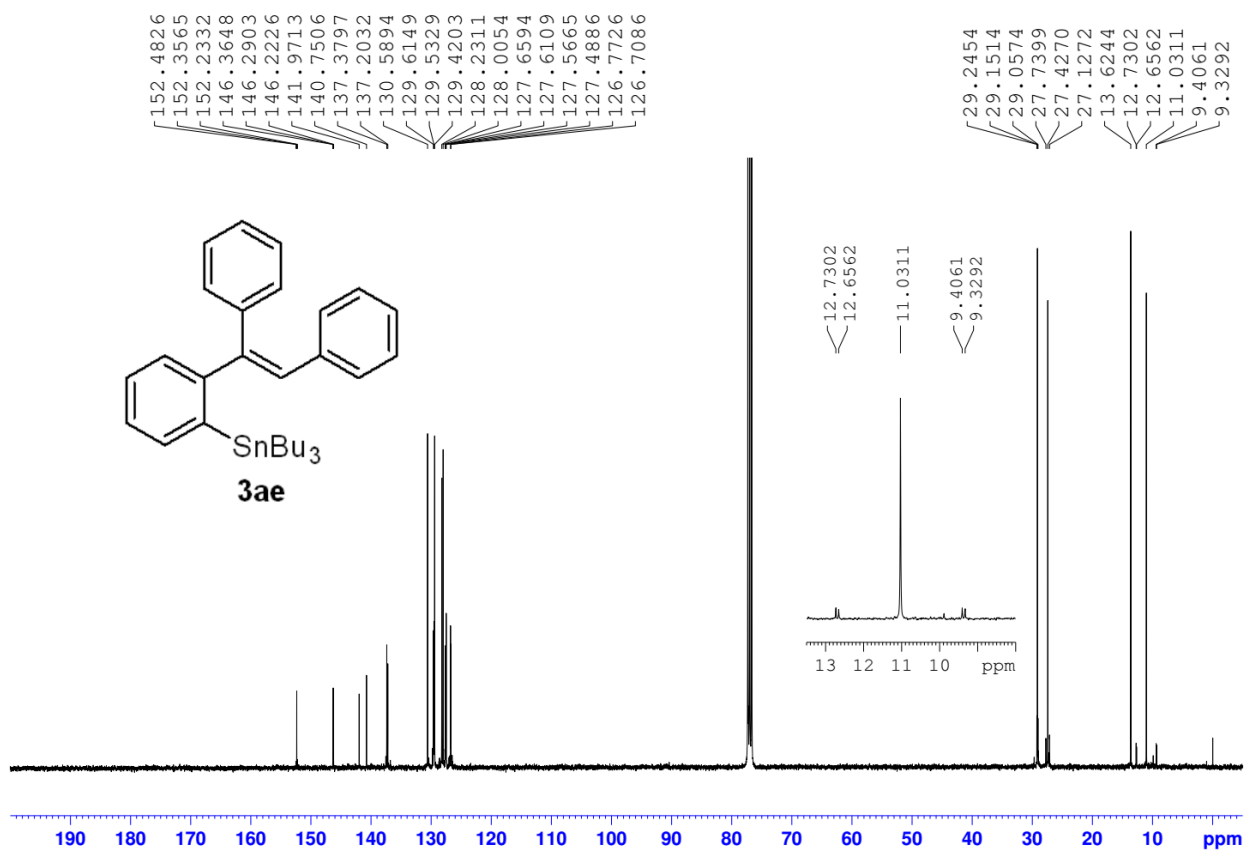

# Electronic Supplementary Information (ESI)

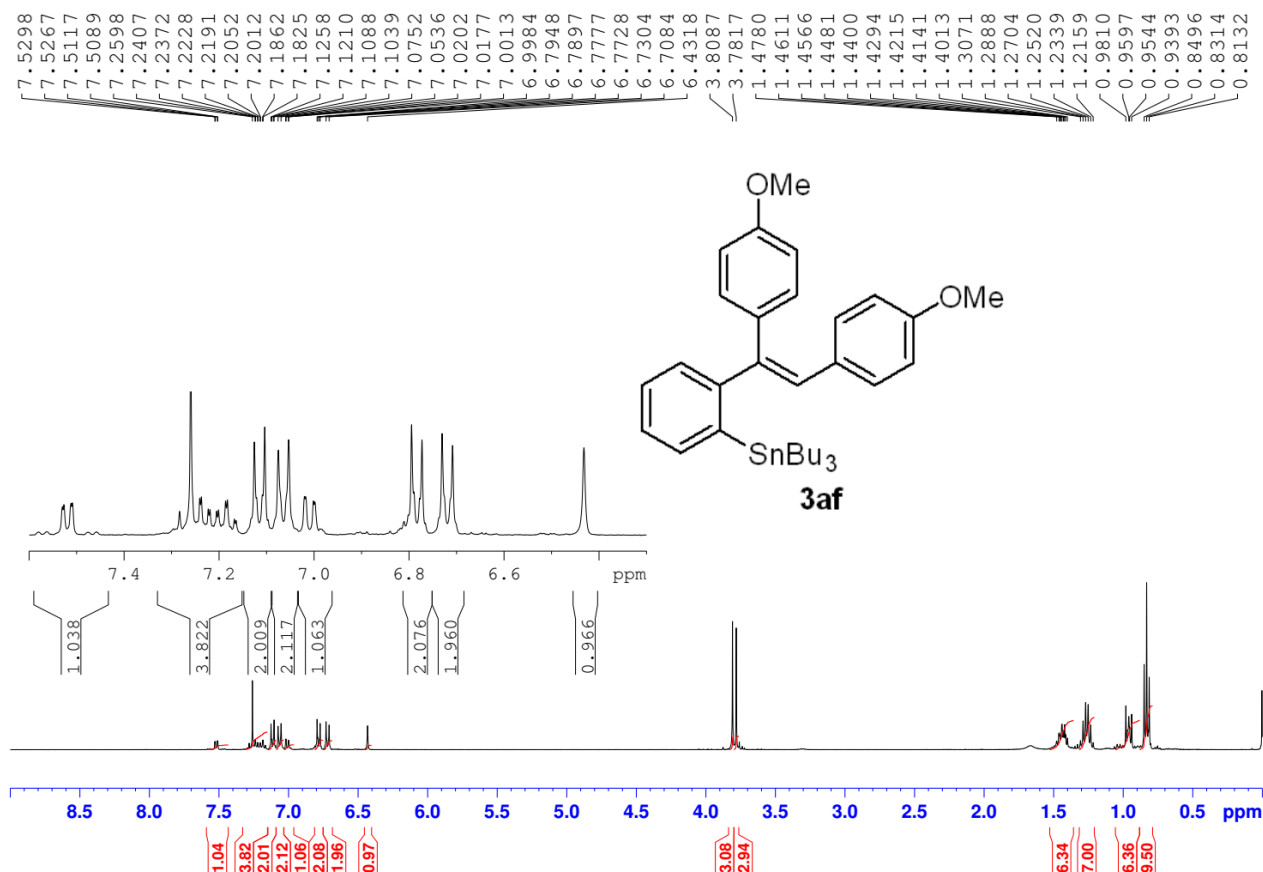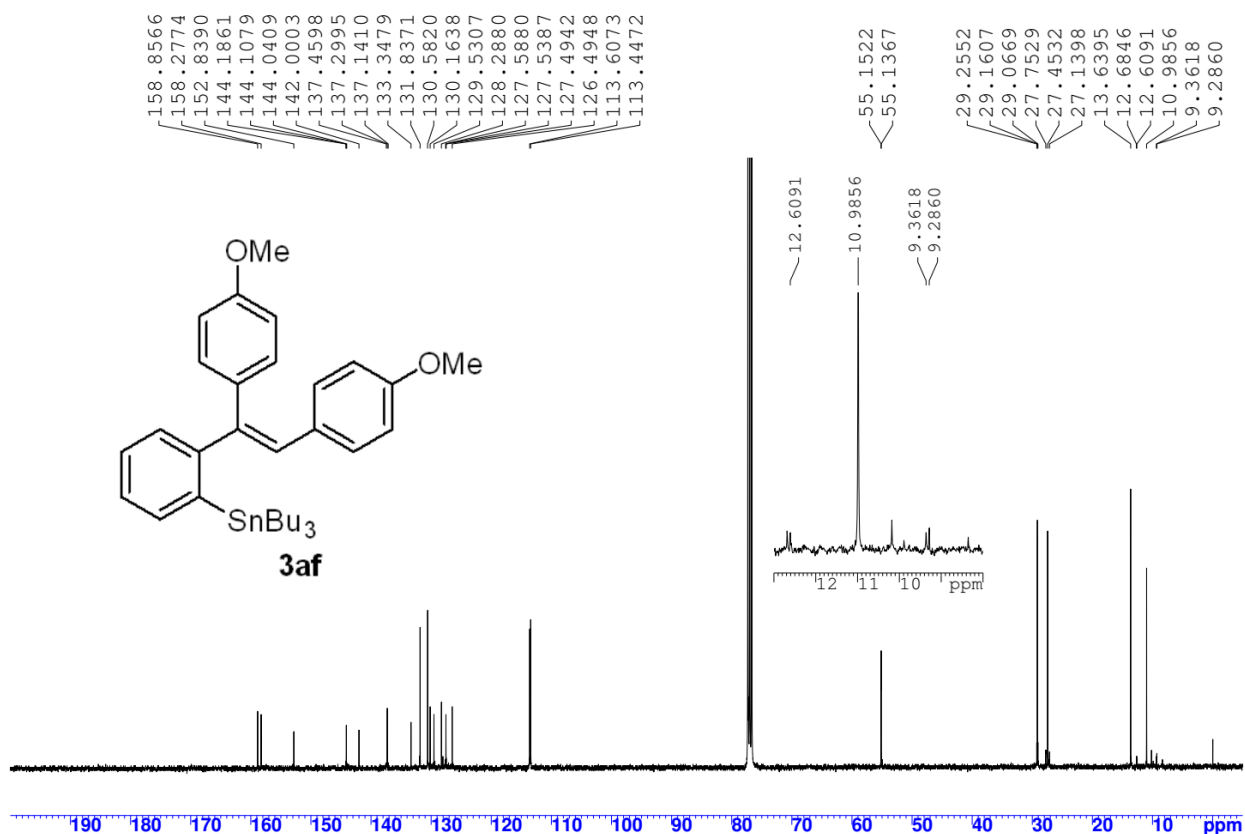

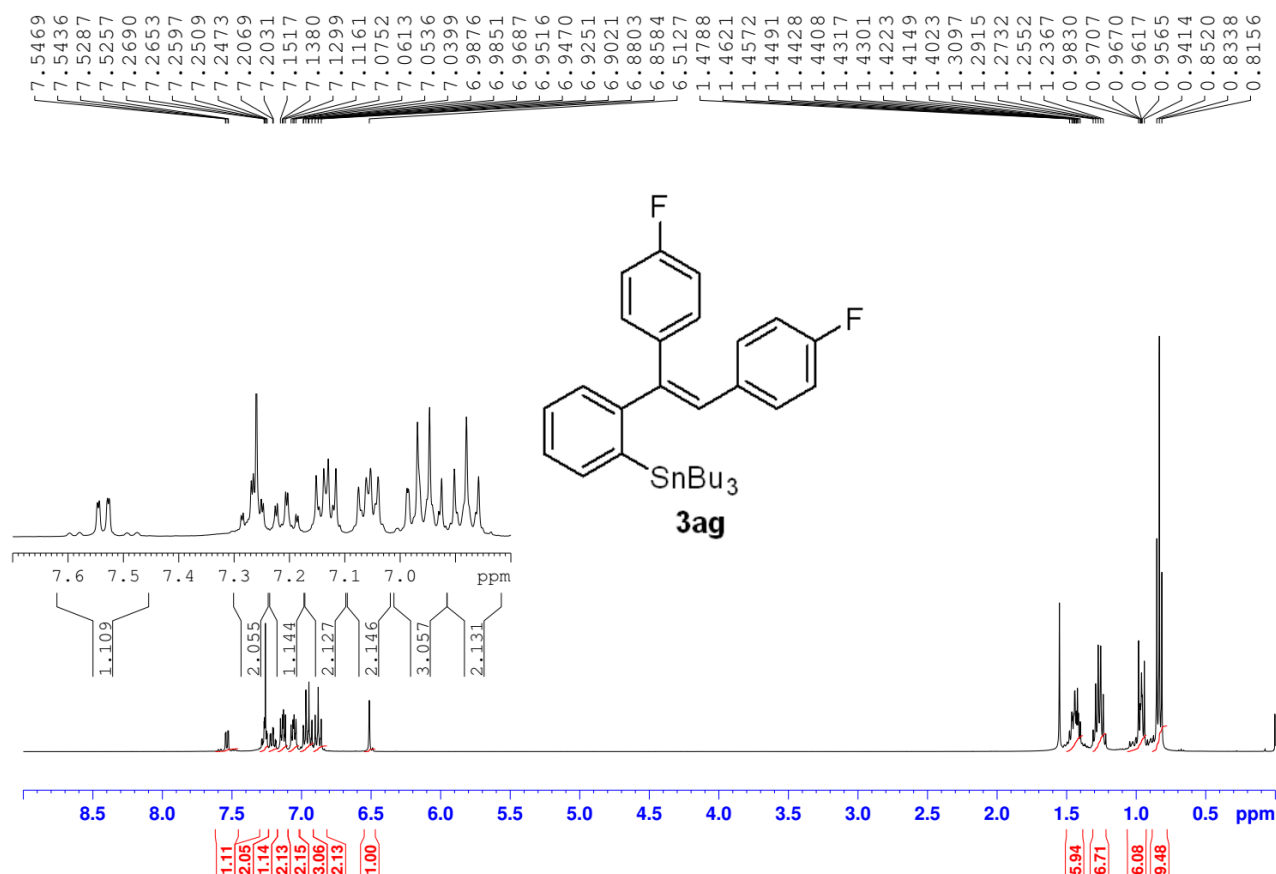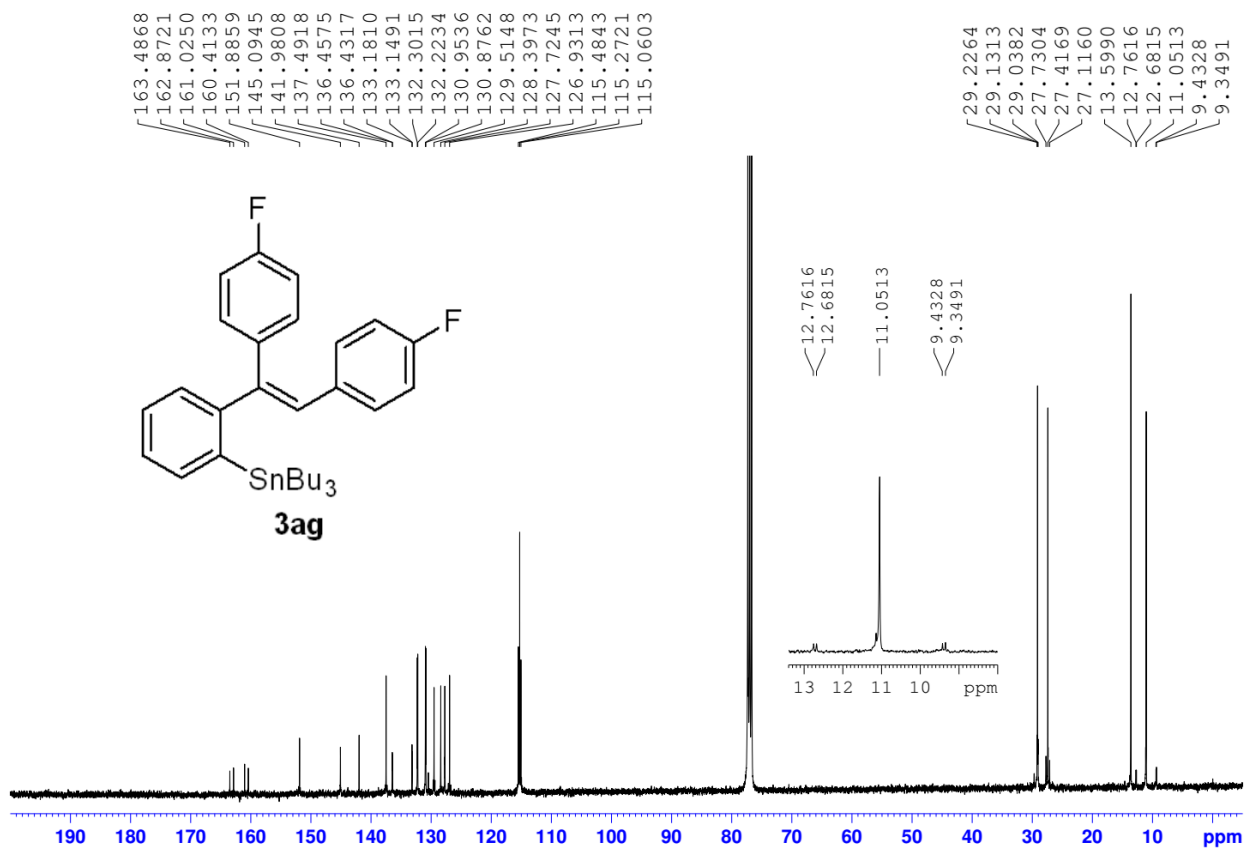



# Electronic Supplementary Information (ESI)

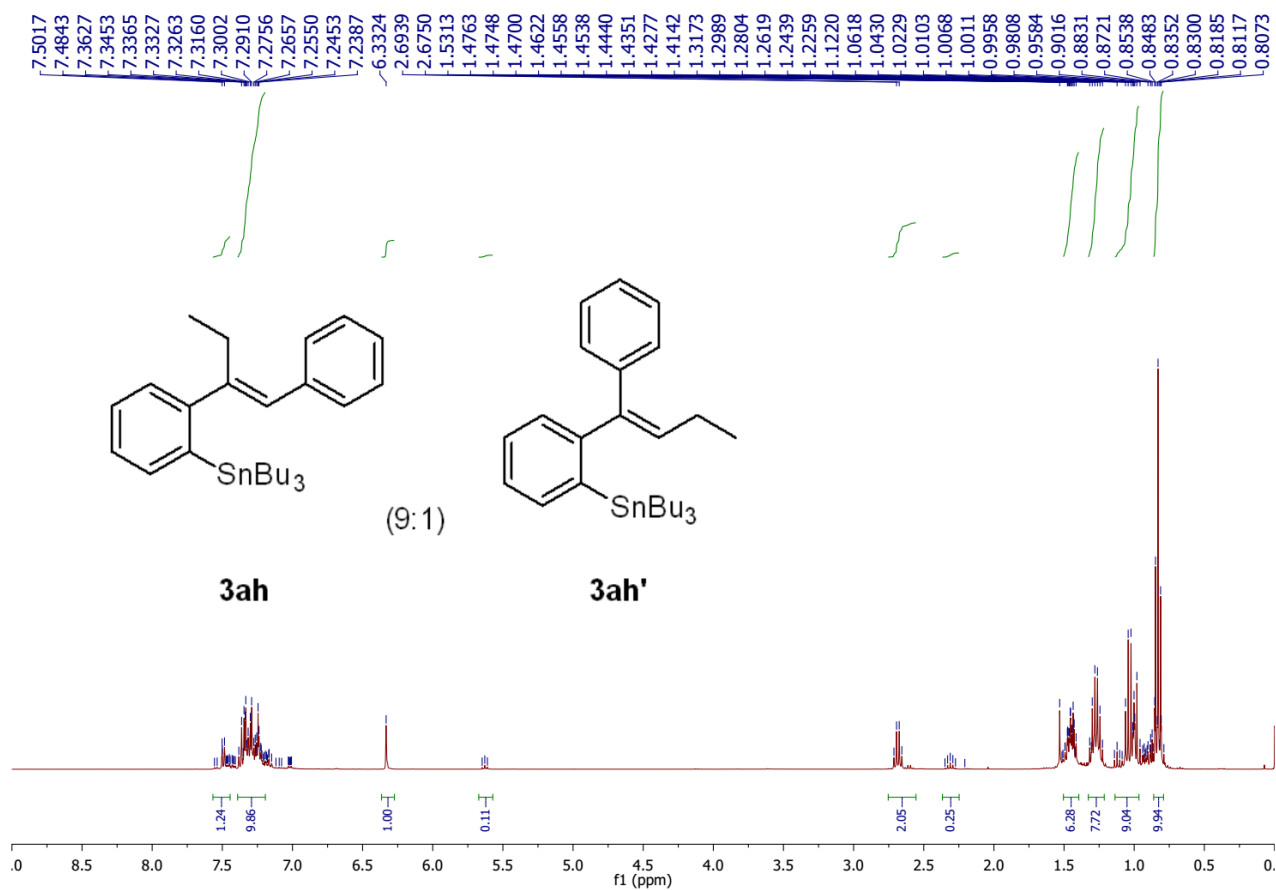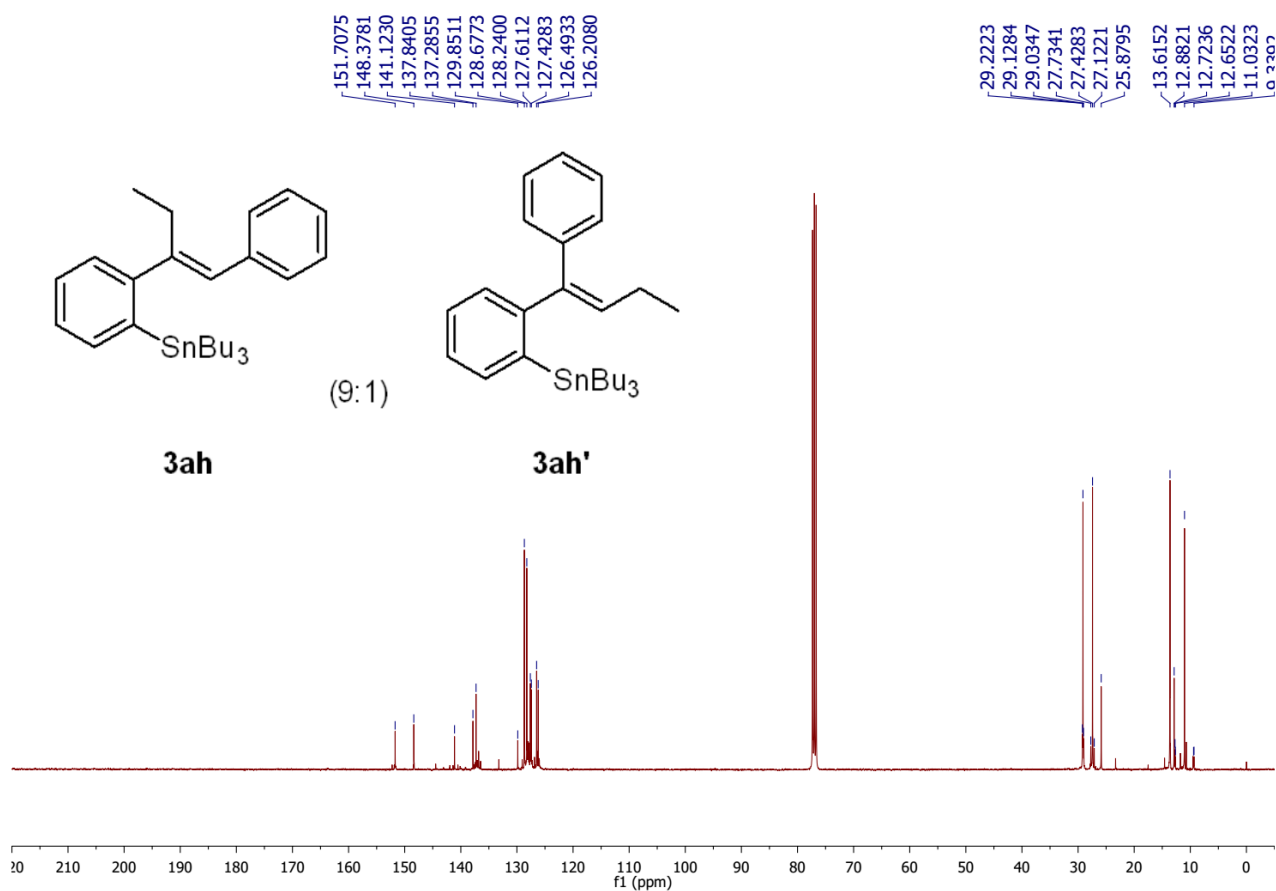

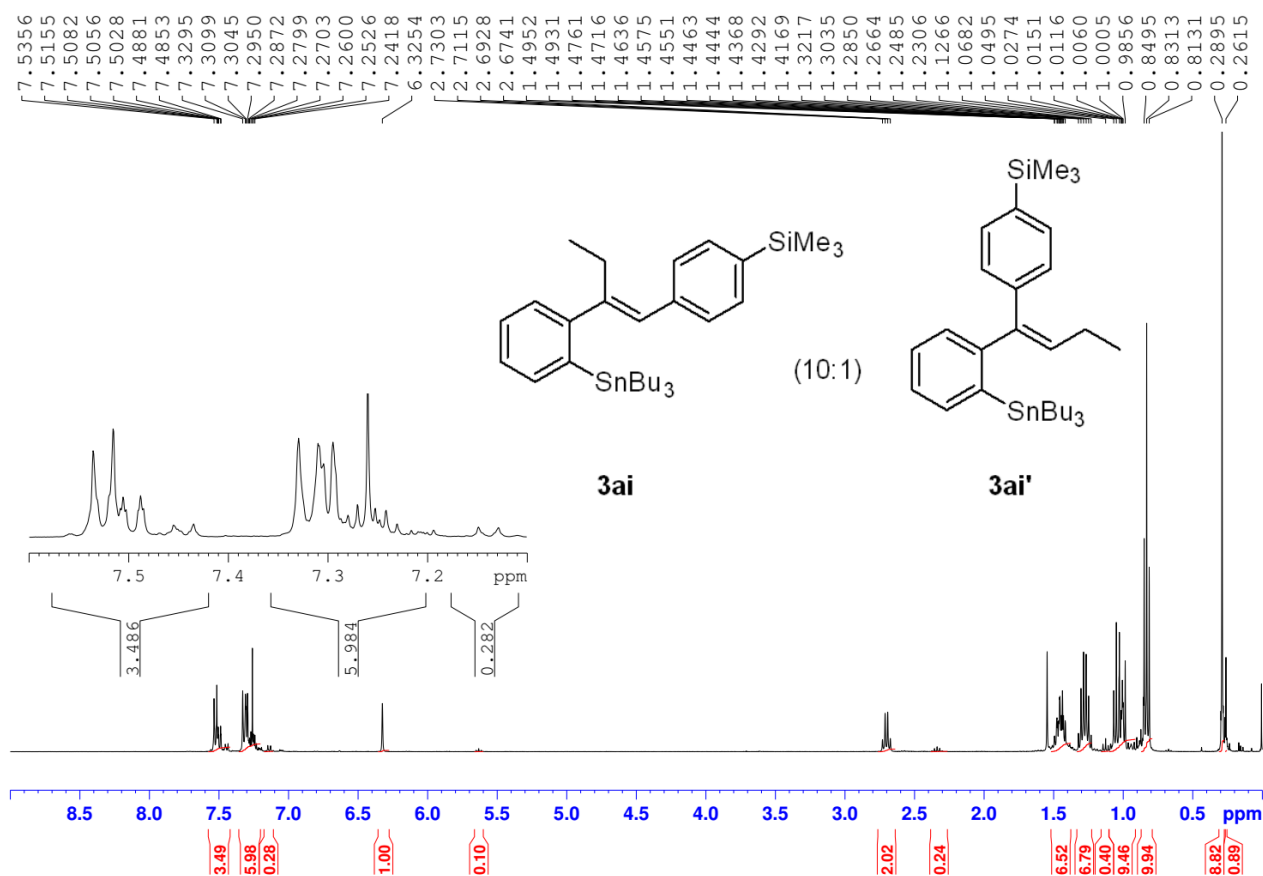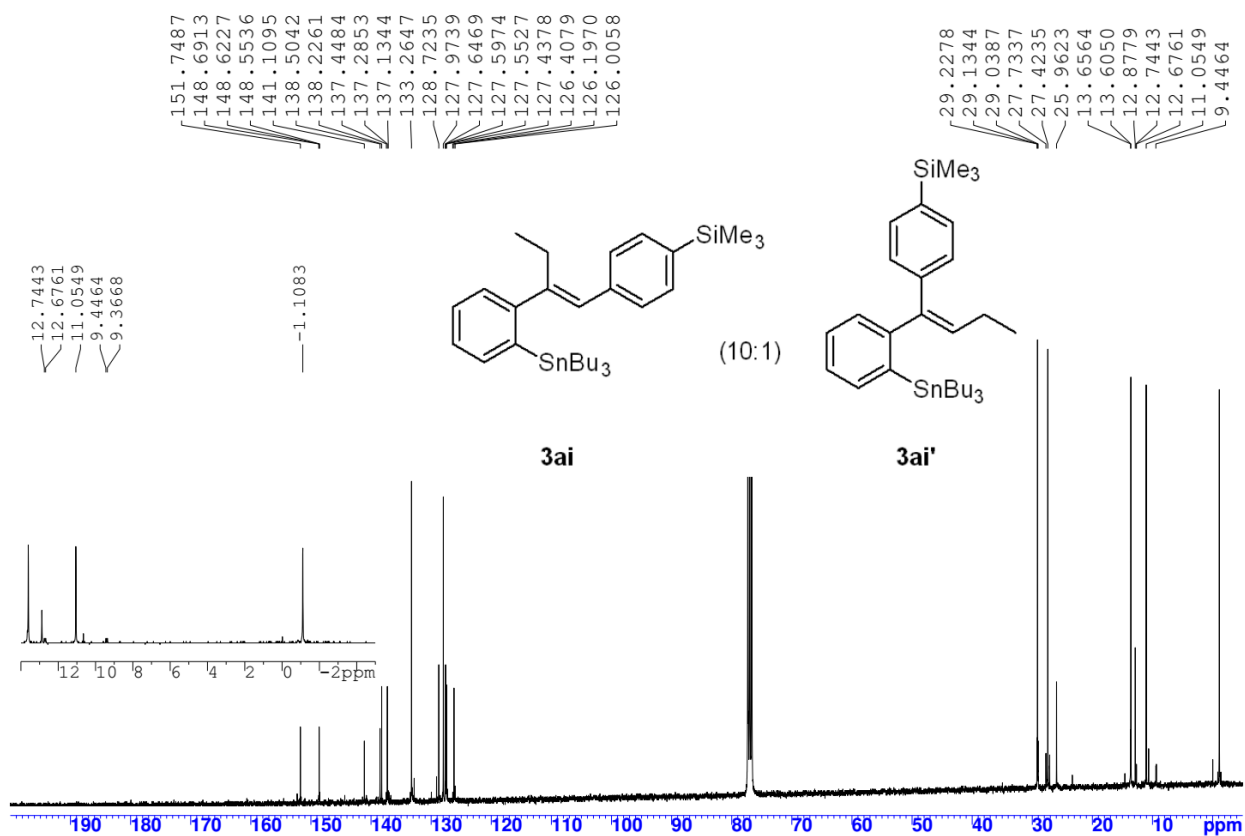

# Electronic Supplementary Information (ESI)

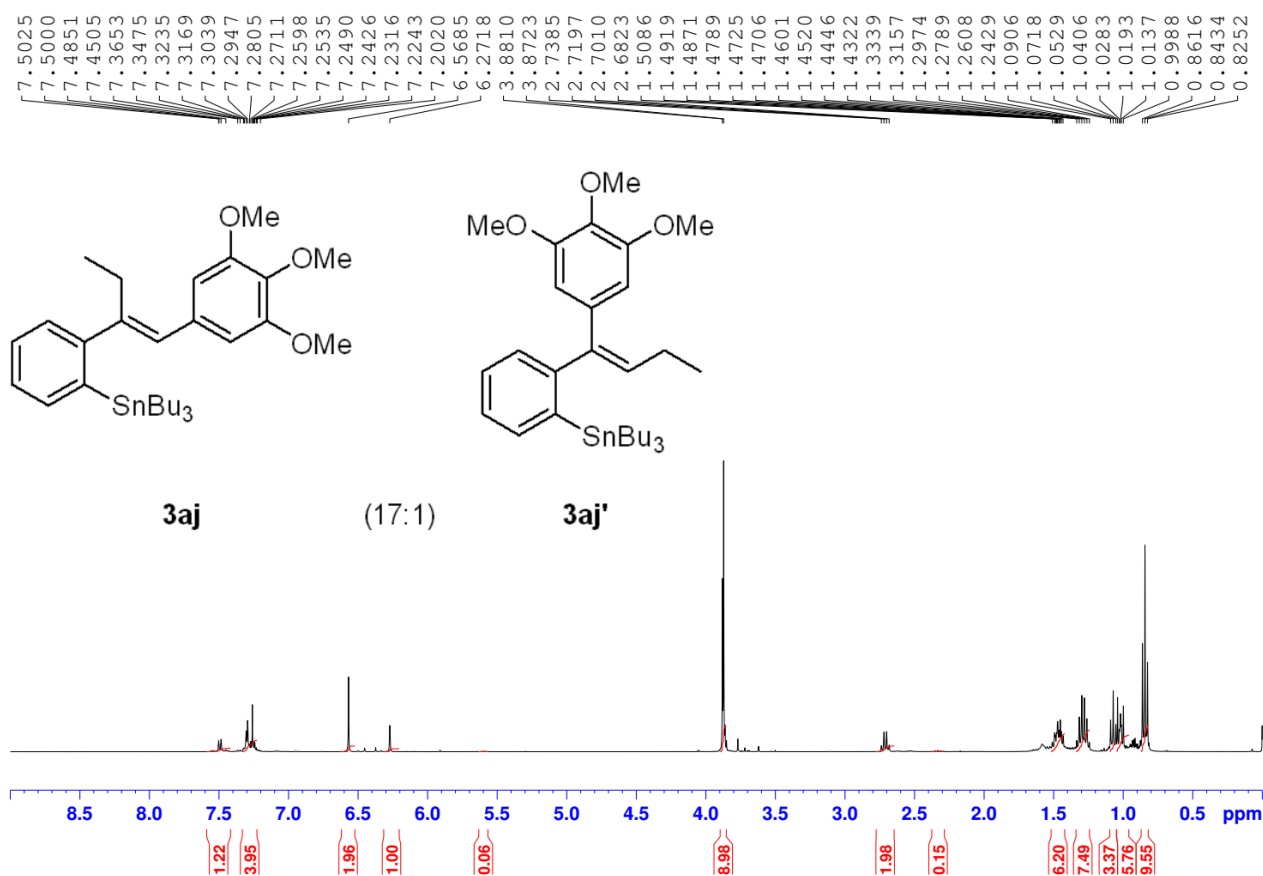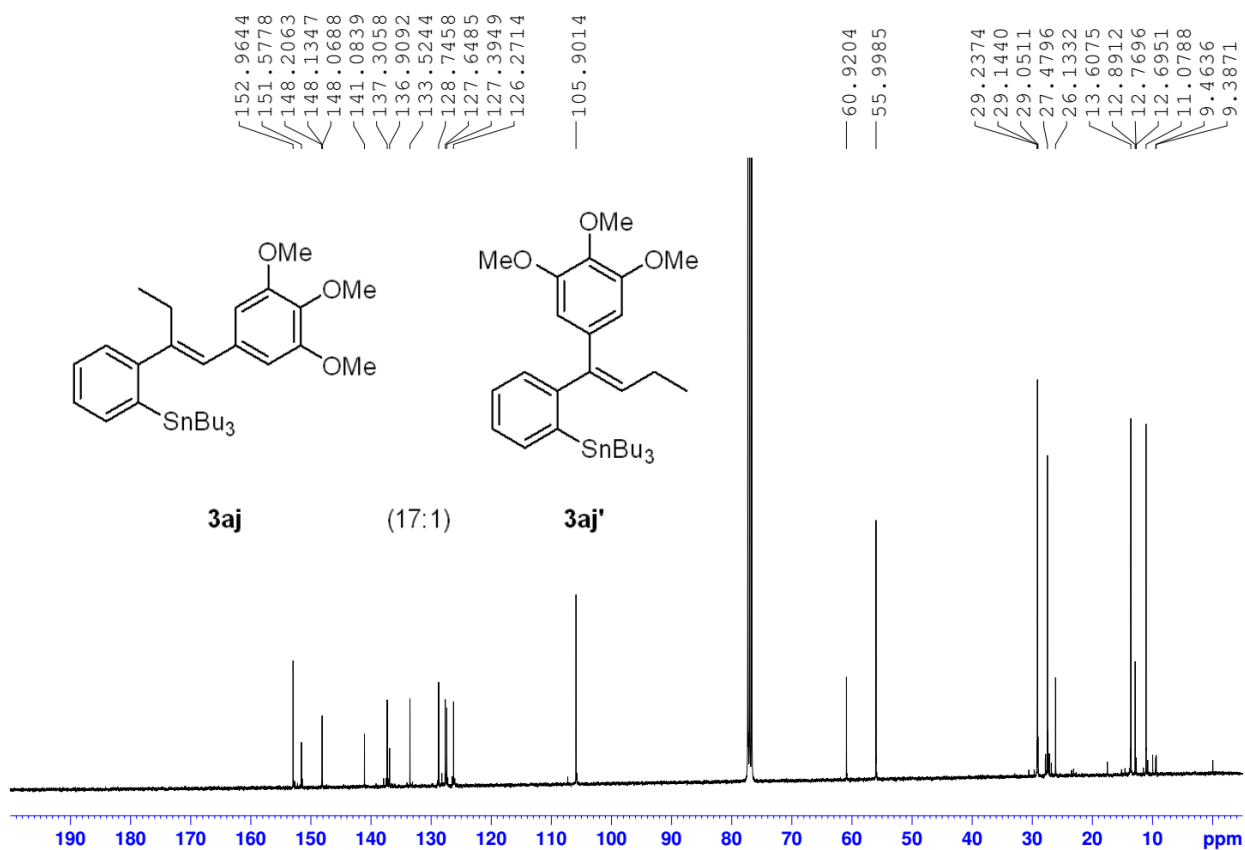

# Electronic Supplementary Information (ESI)

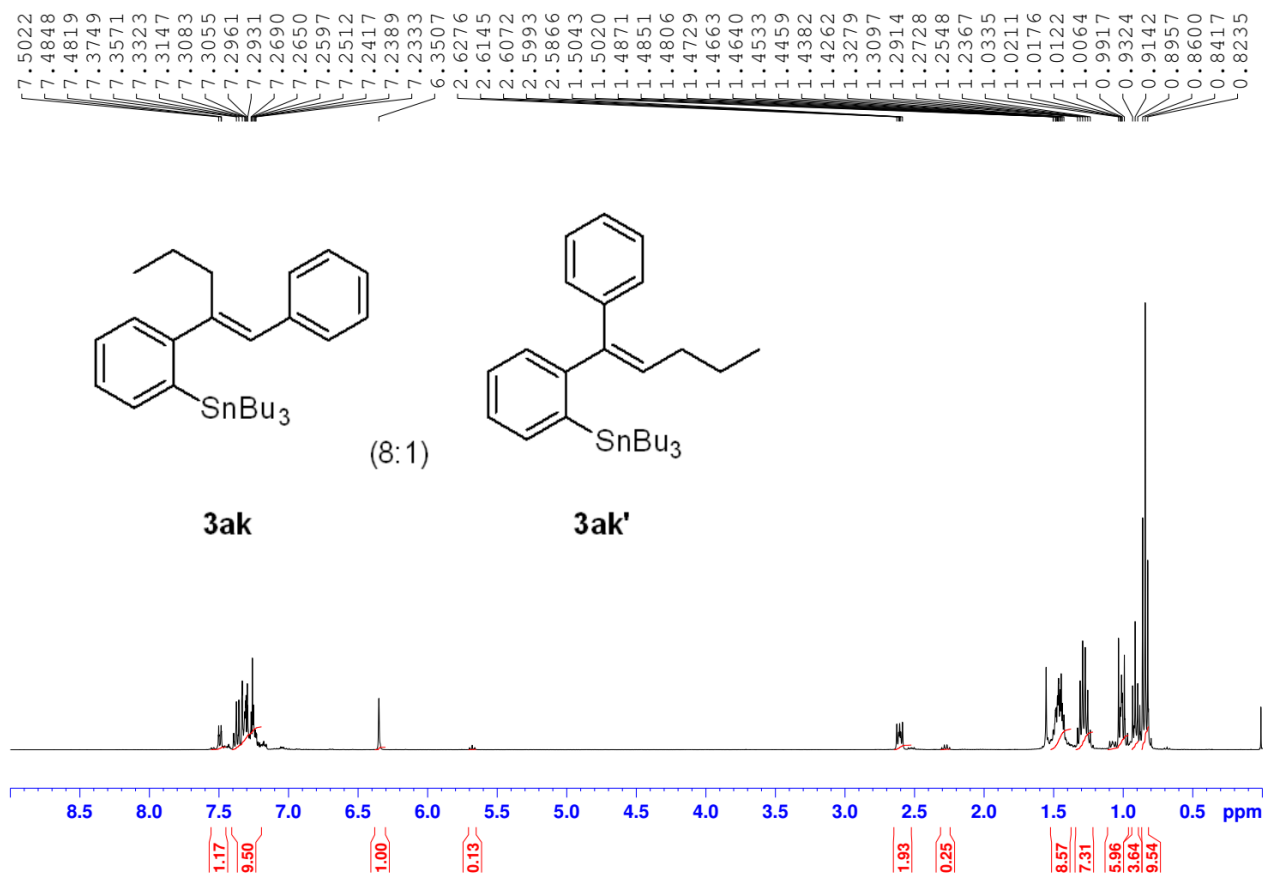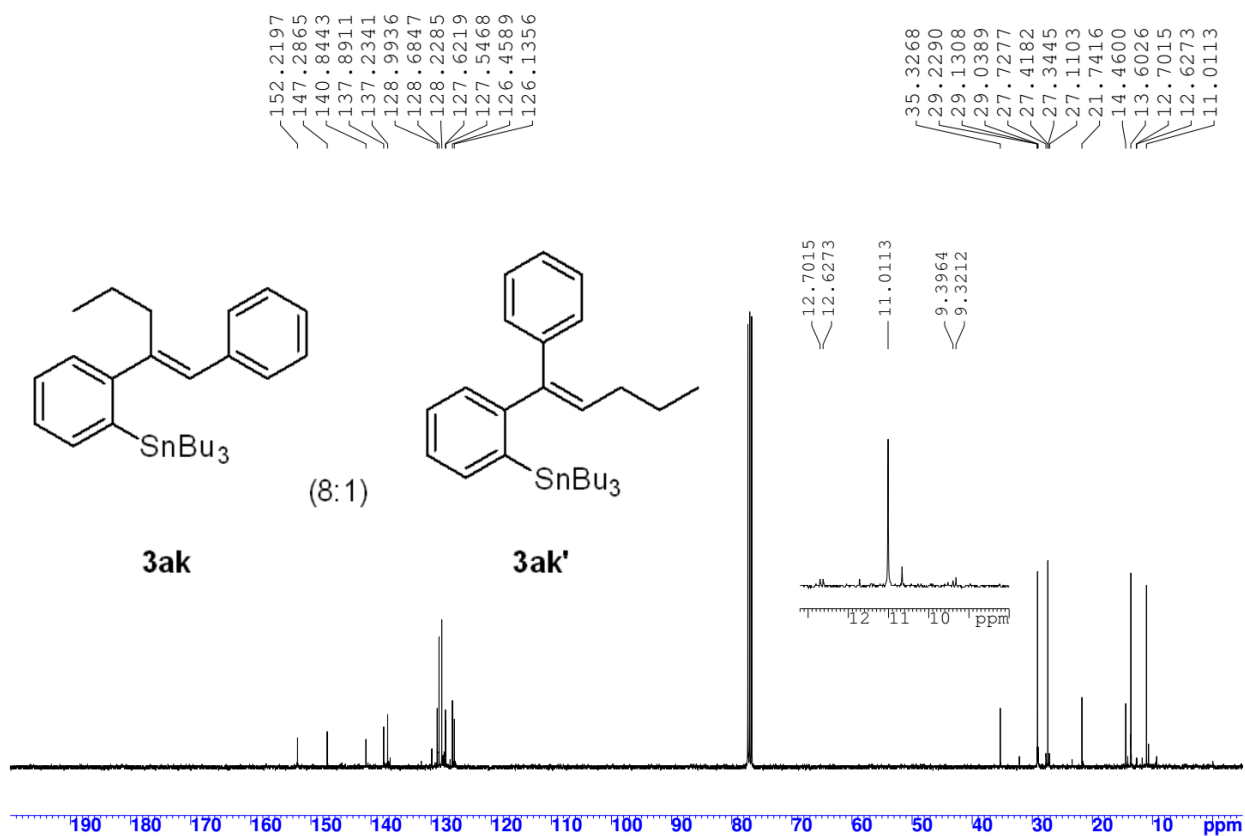

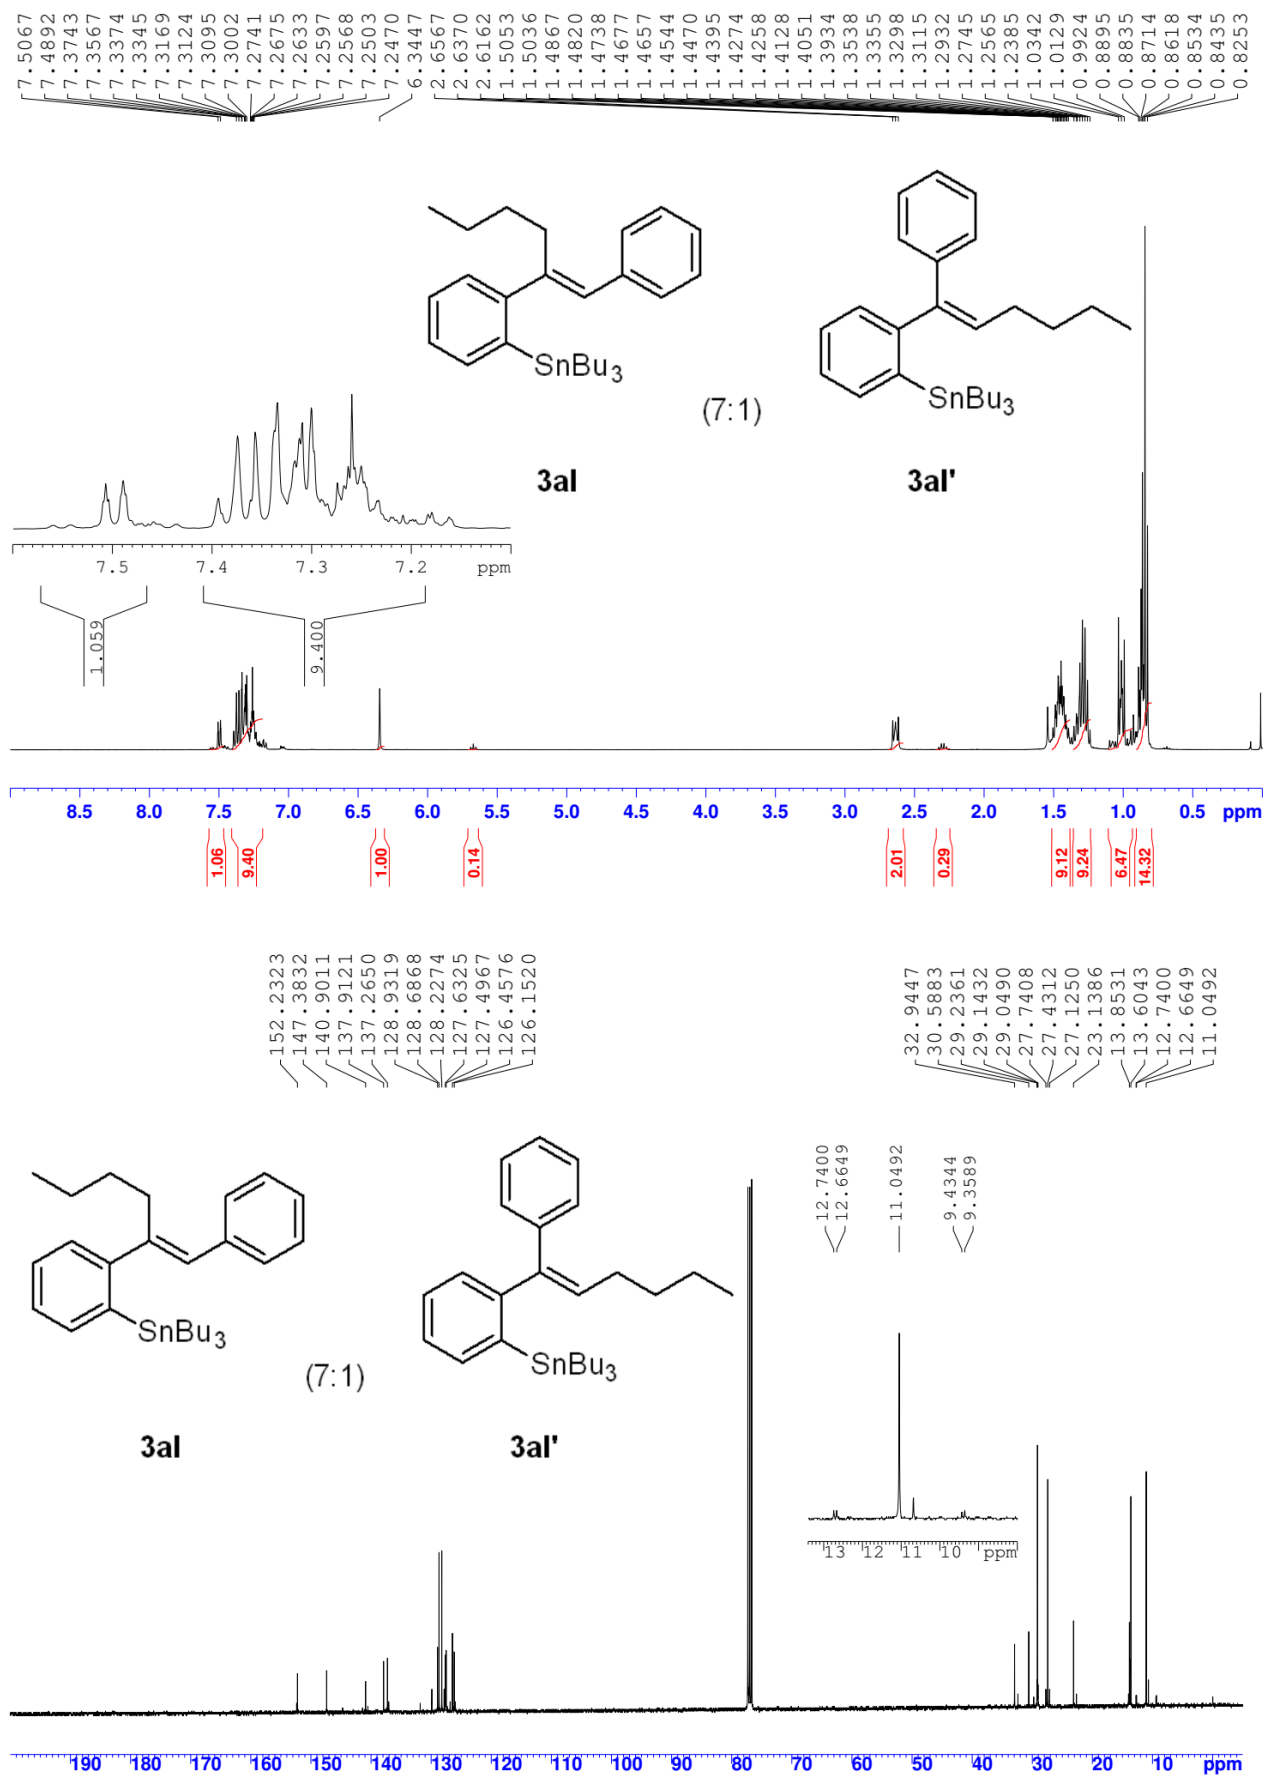

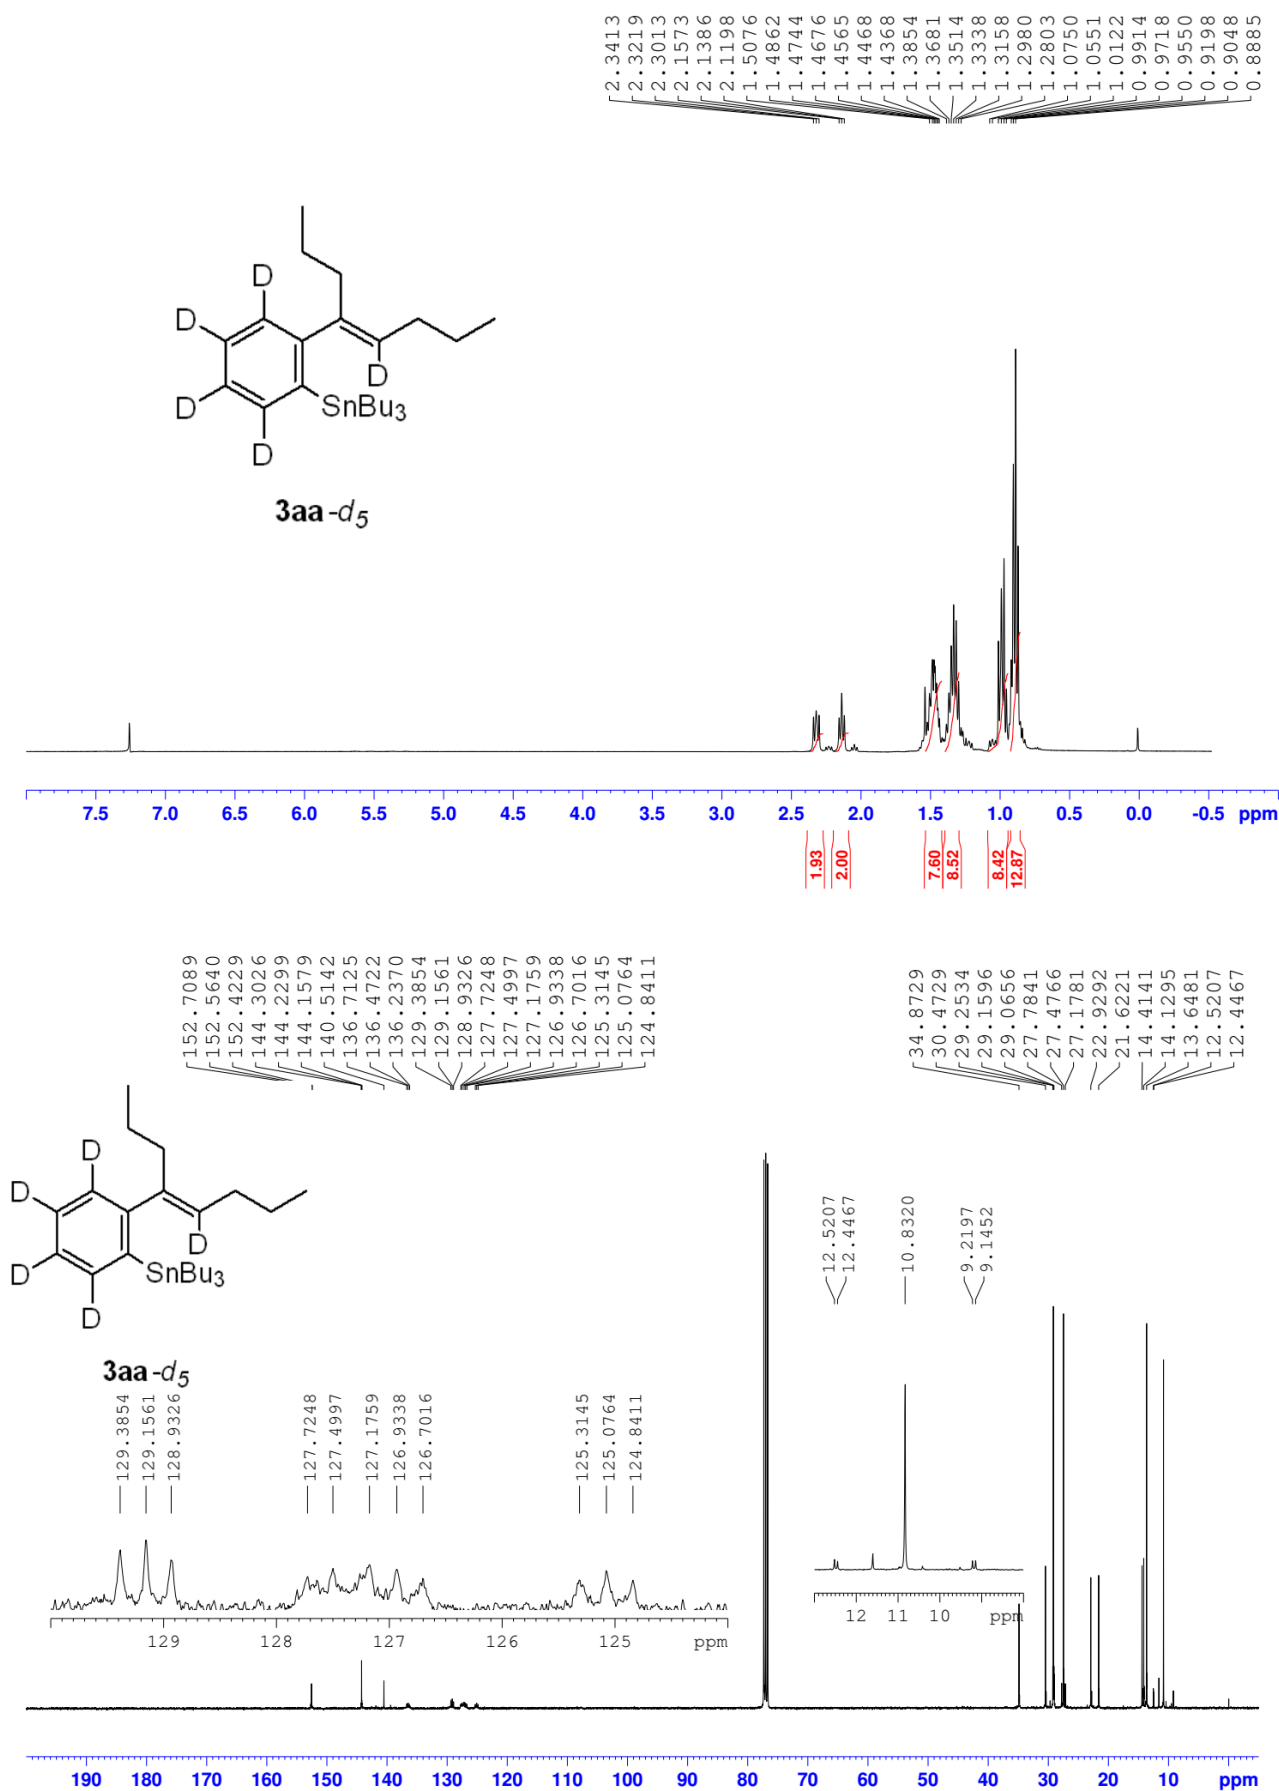

## Electronic Supplementary Information (ESI)

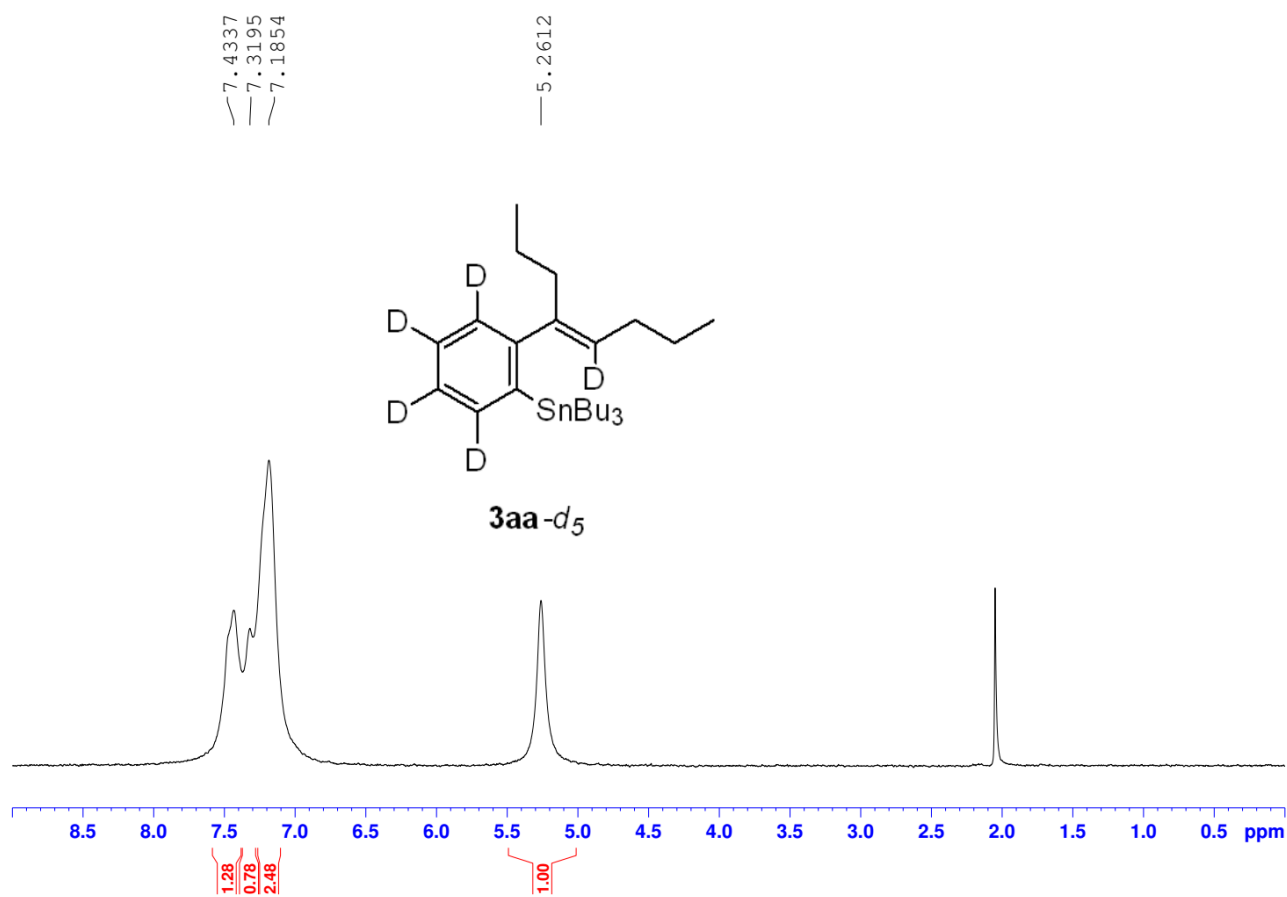

# Electronic Supplementary Information (ESI)

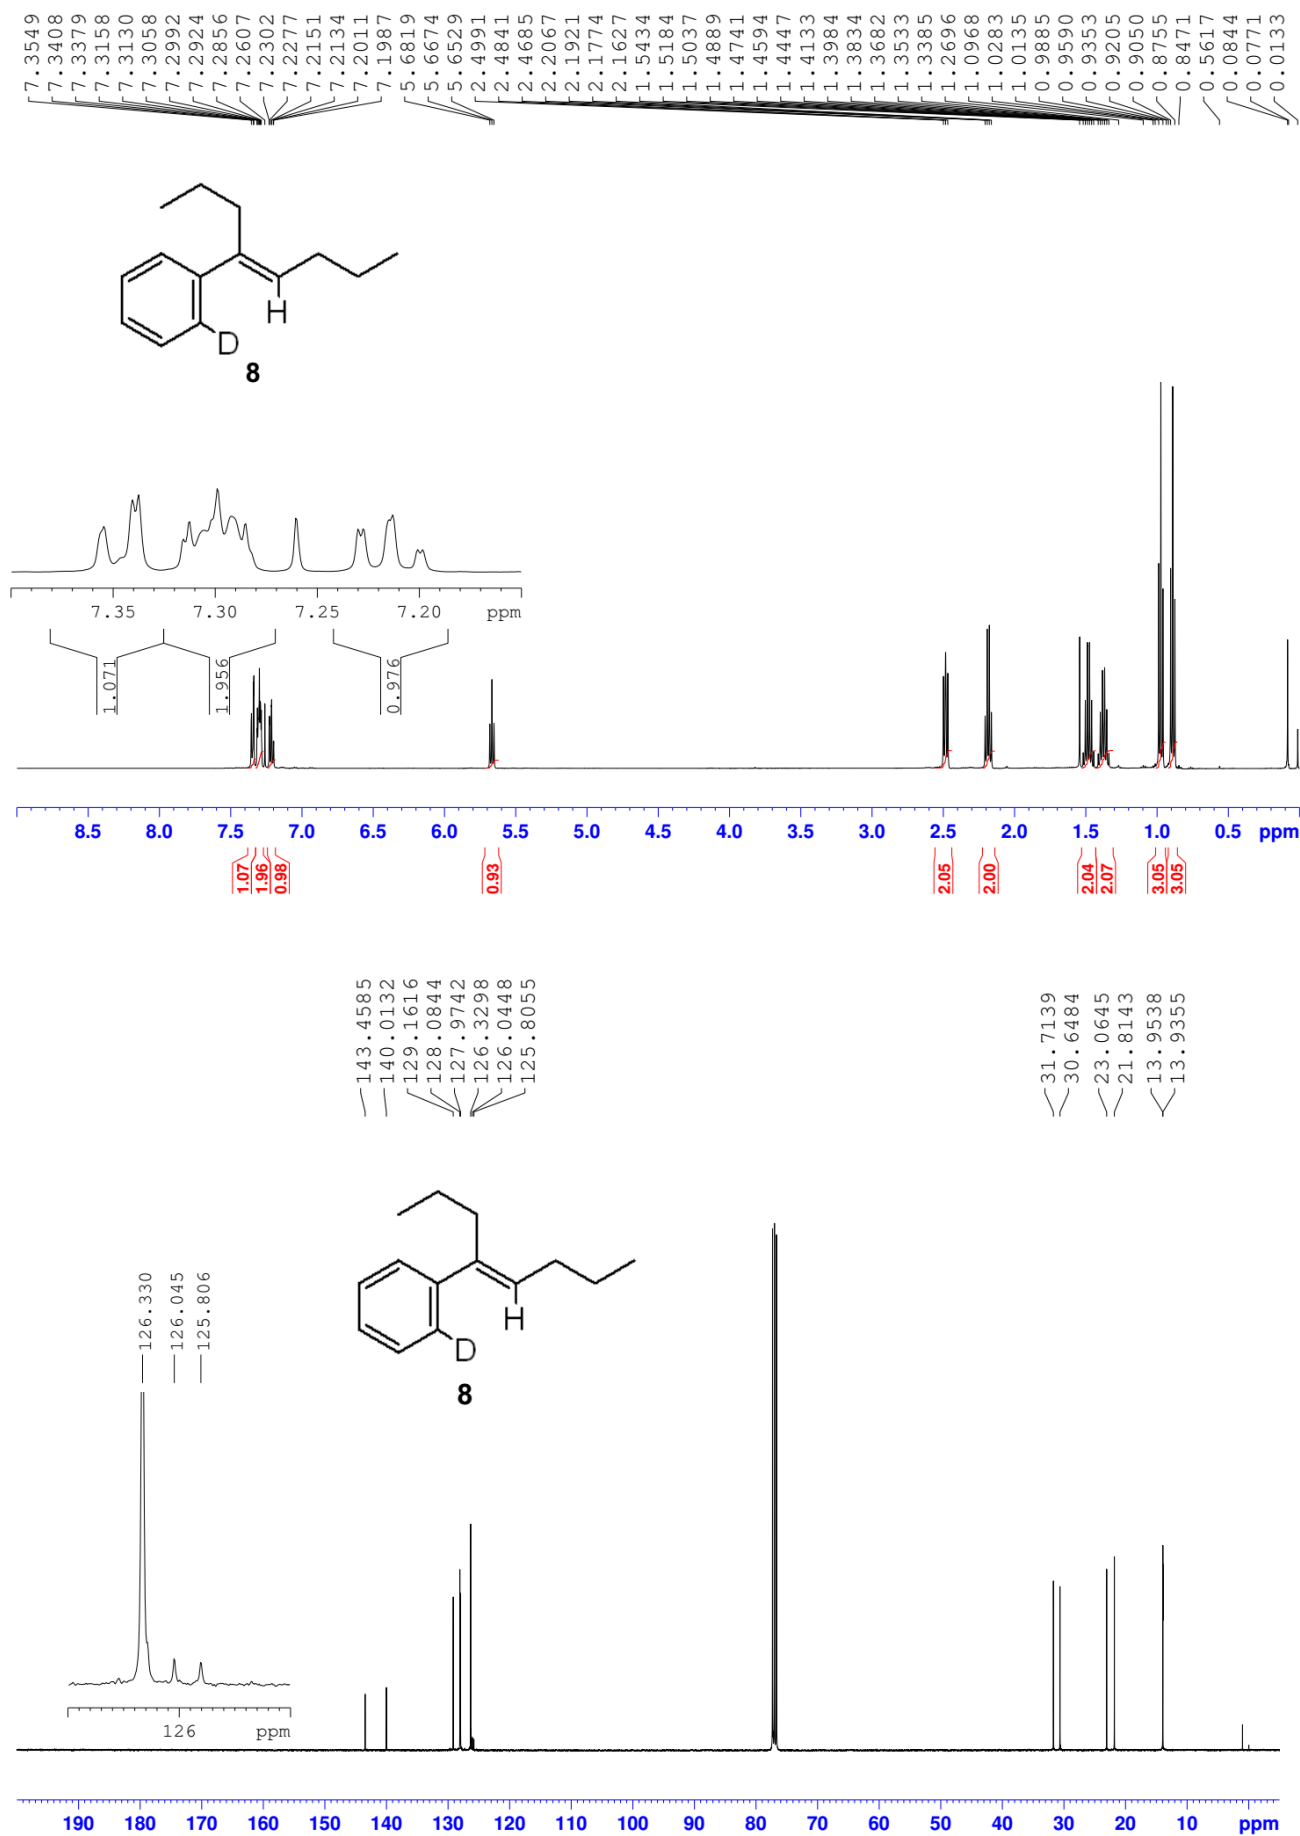



# Electronic Supplementary Information (ESI)

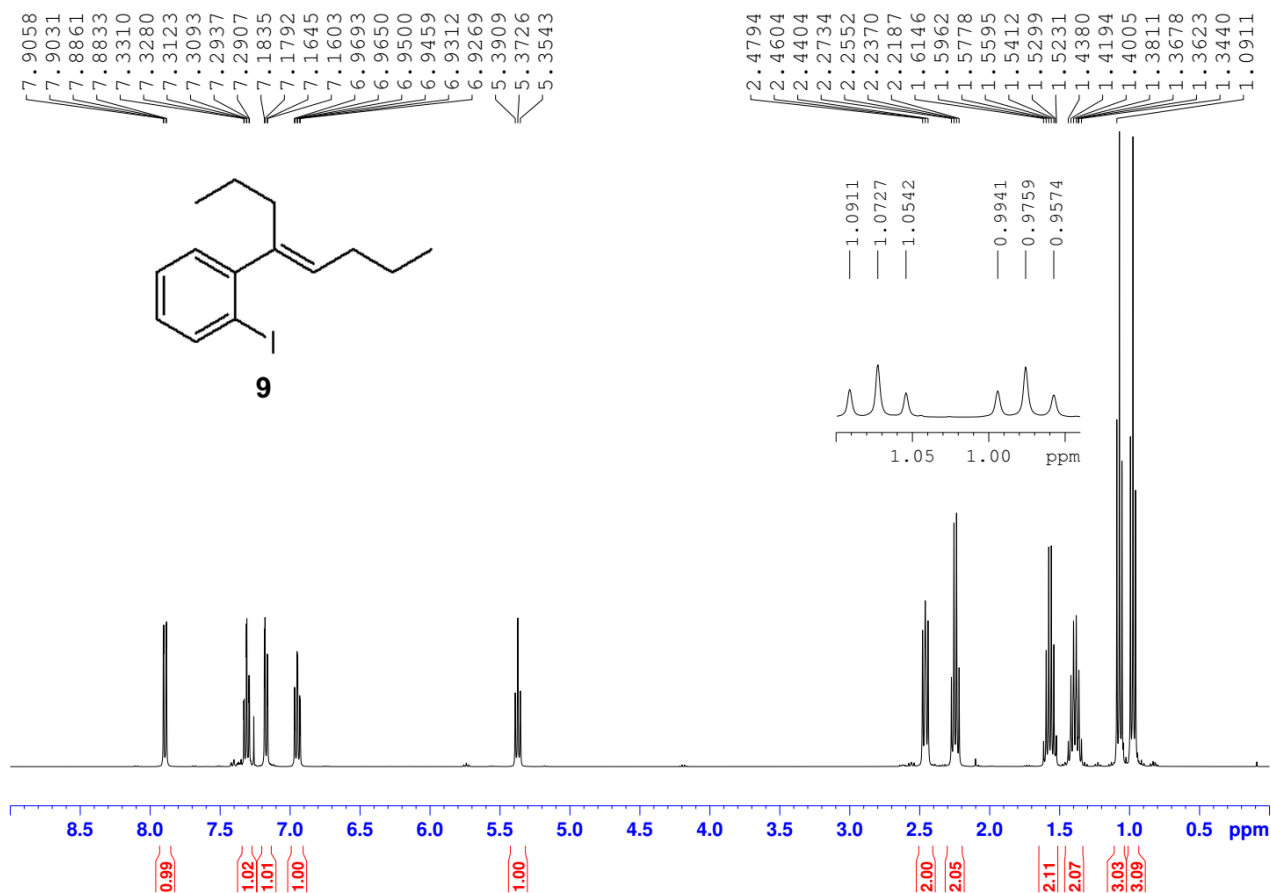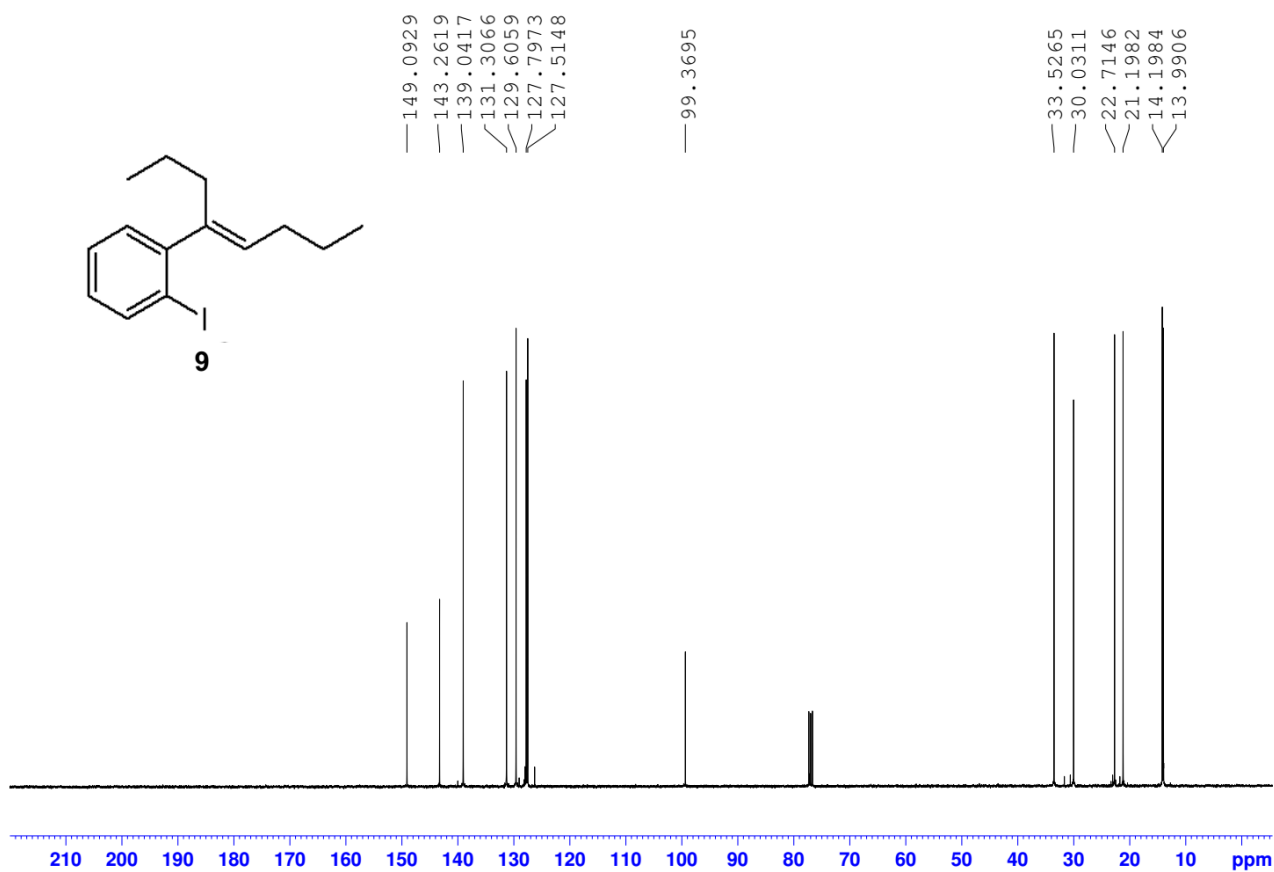

# Electronic Supplementary Information (ESI)

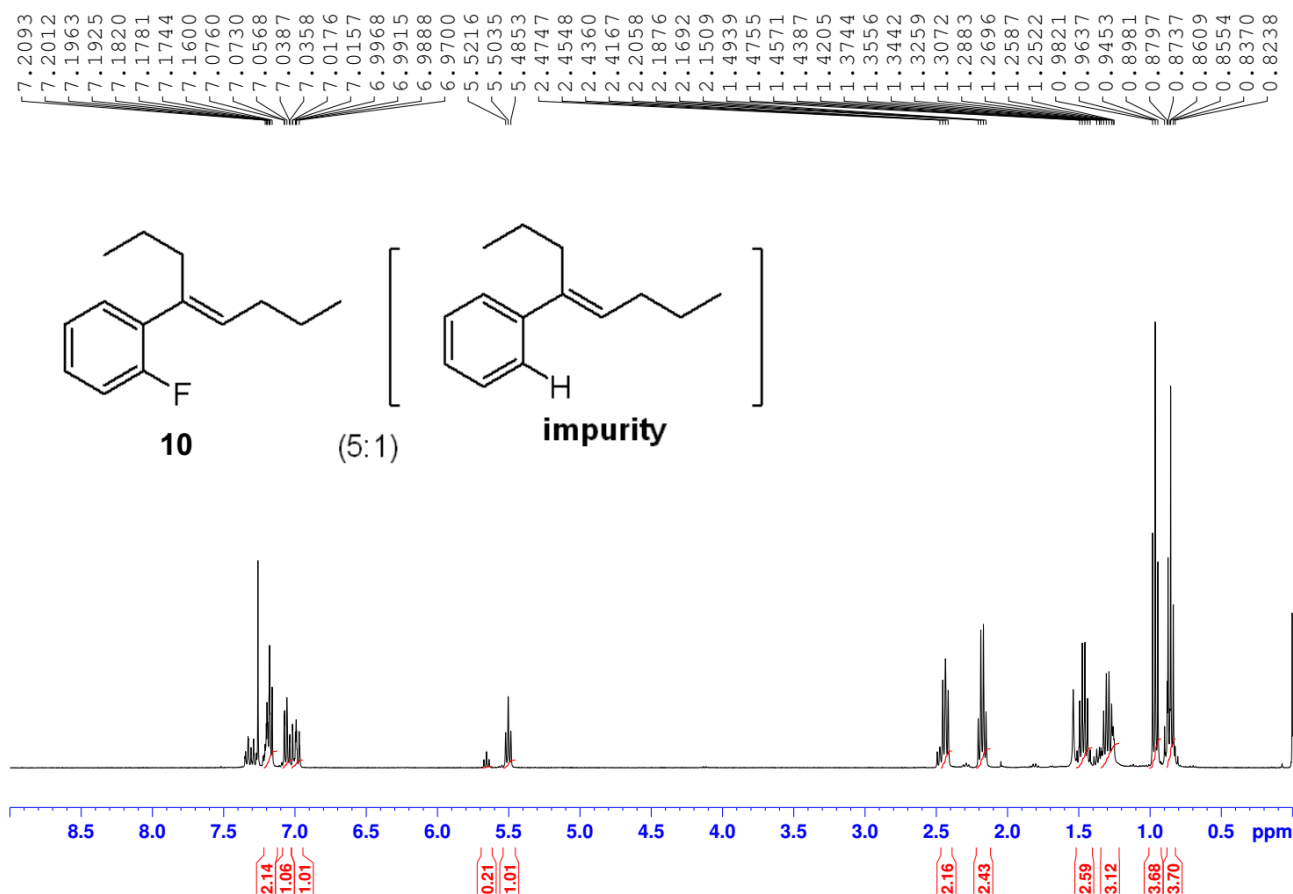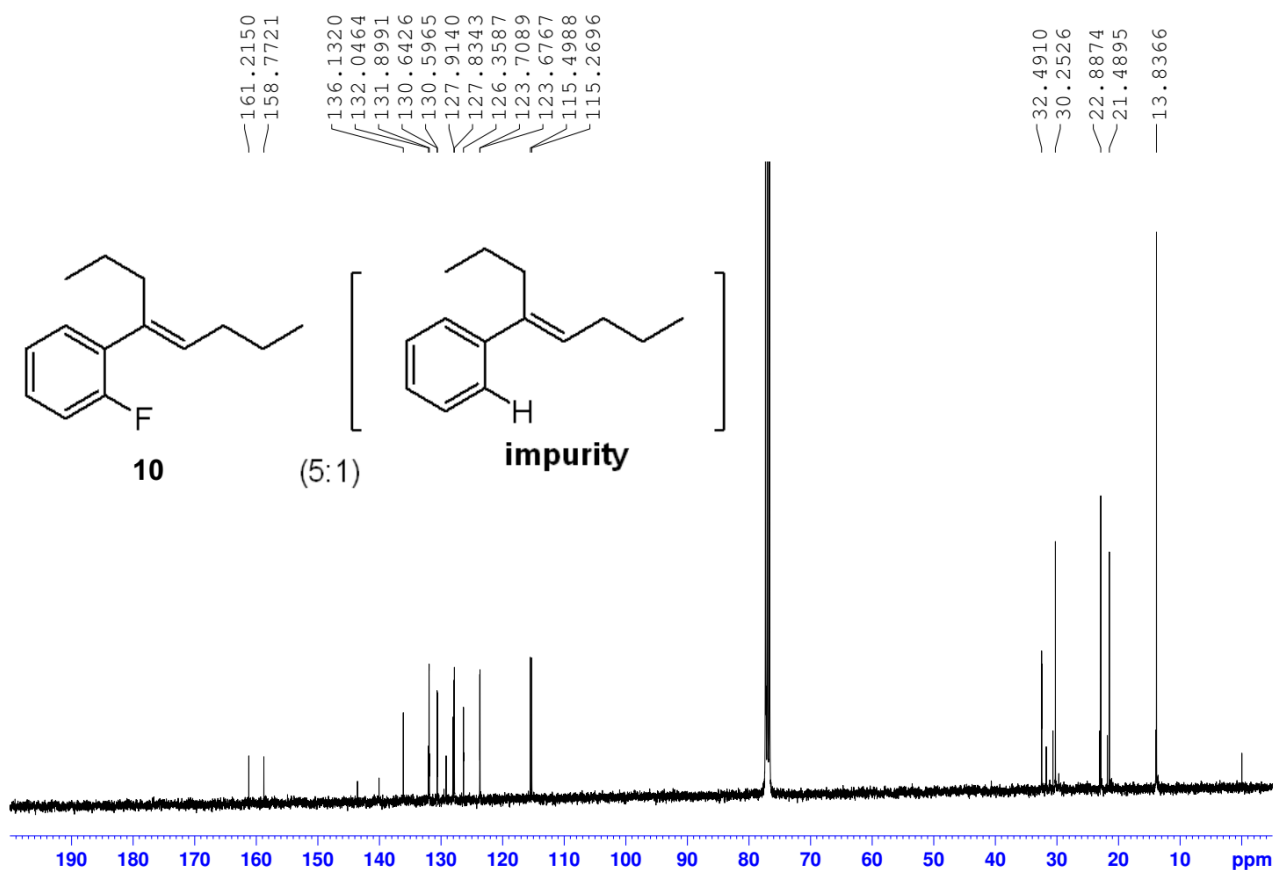

# Electronic Supplementary Information (ESI)

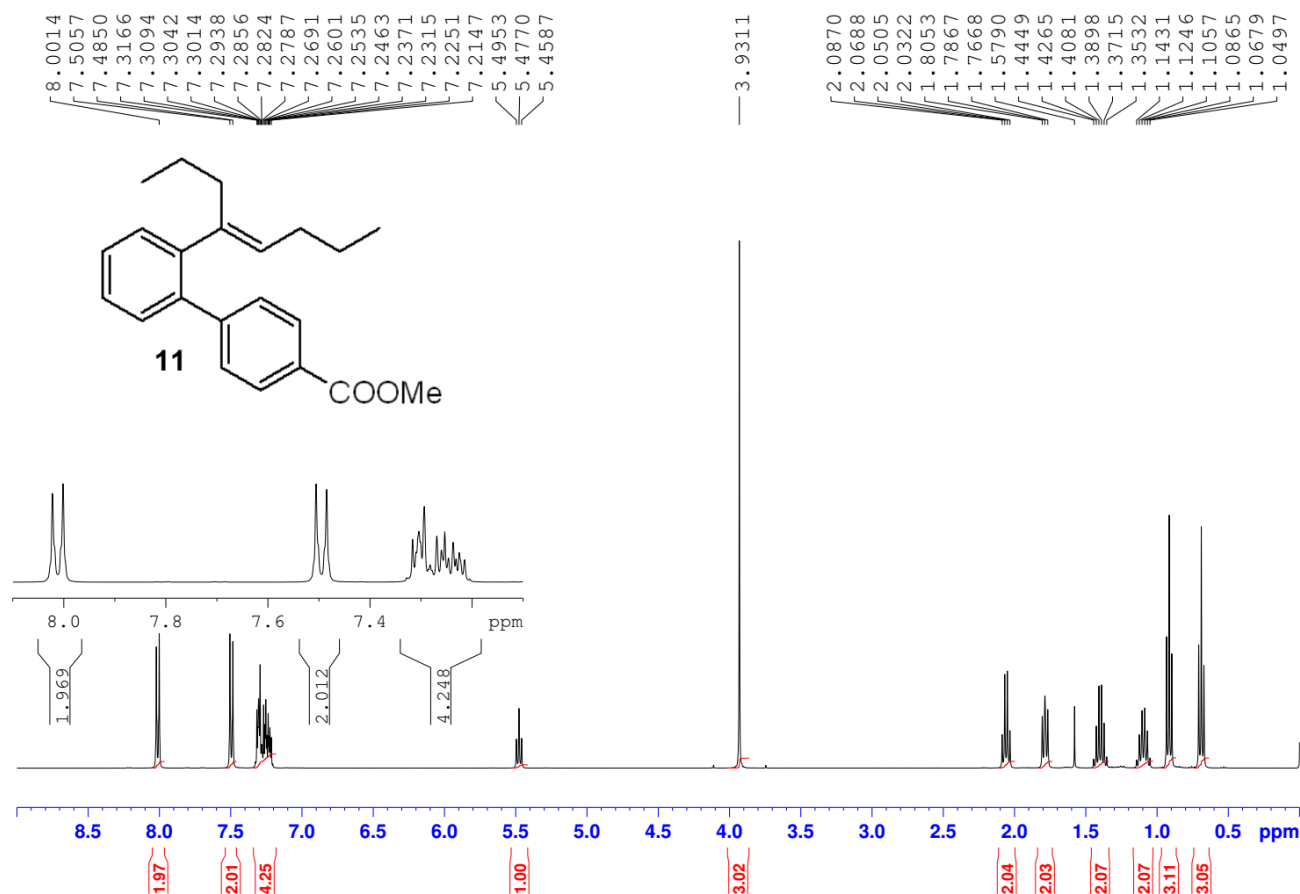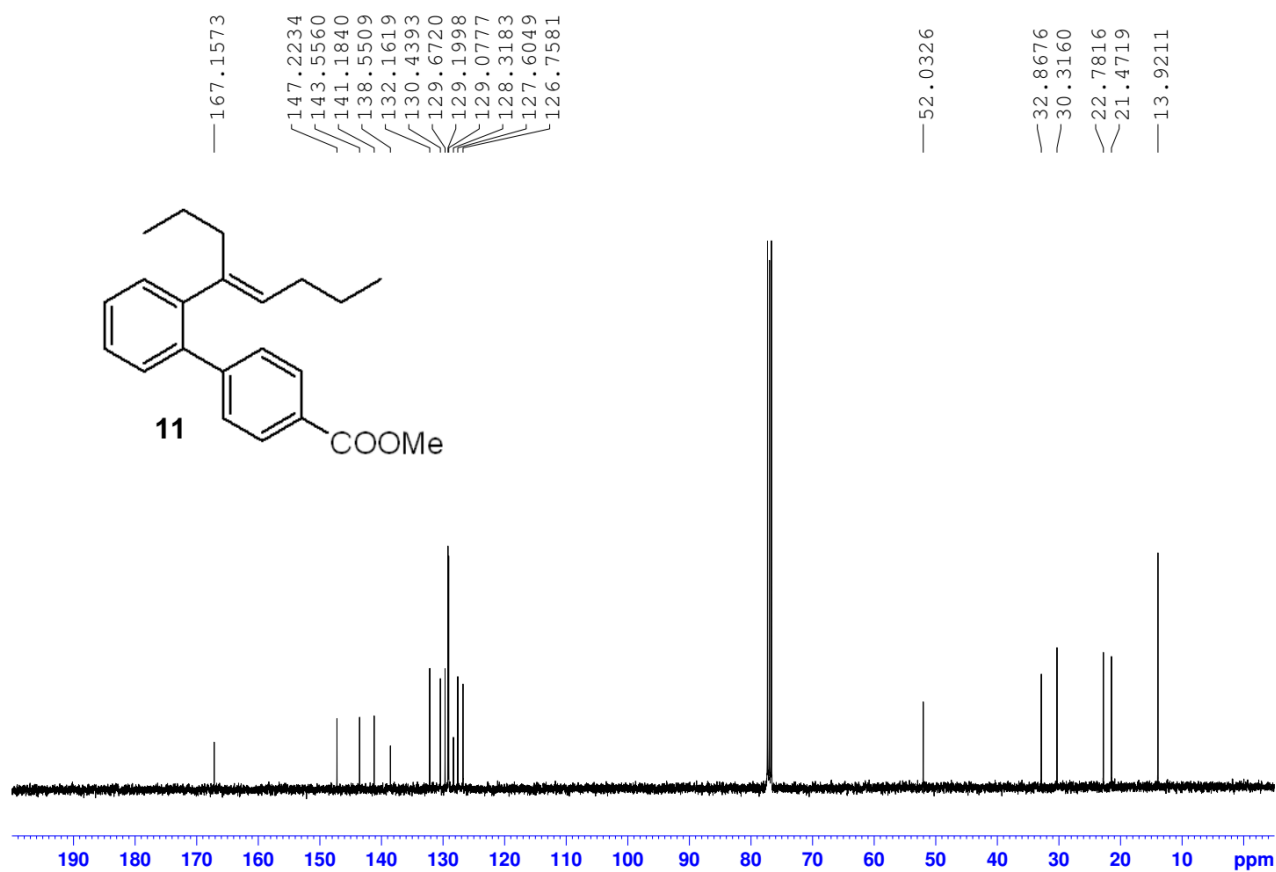

# Electronic Supplementary Information (ESI)

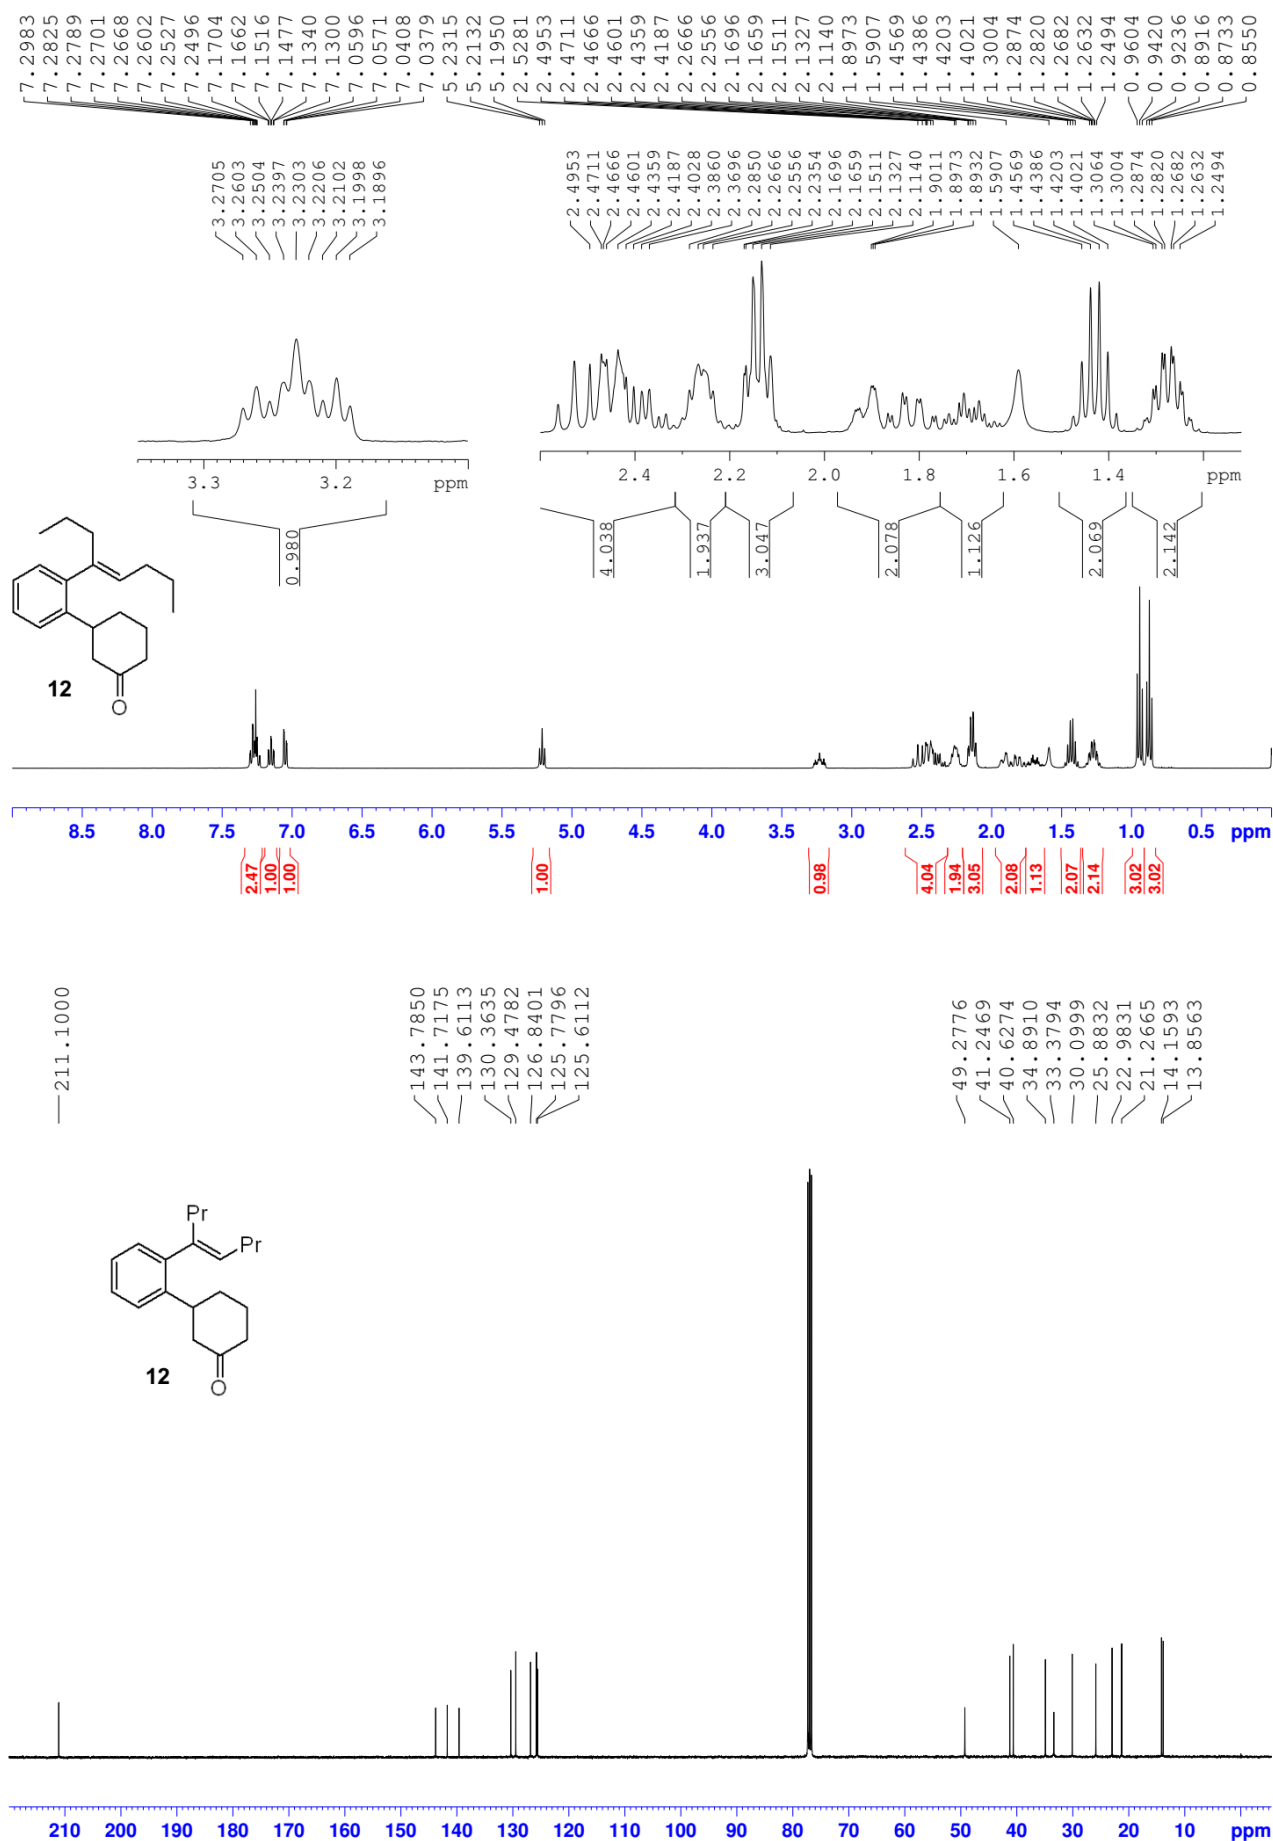

Supplement: c8sc02459f1.pdf [file c8sc02459f1.pdf]
